# Supplementary material
Source: PubMed Central journal article supplement (PMC7294730)

**Development of selective steroid inhibitors for the glucose-6-phosphate dehydrogenase from  
*Trypanosoma cruzi***

Fabício Fredo Naciuk, Jéssica do Nascimento Faria, Amanda Gonçalves Eufrazio, Artur Torres Cordeiro\* and Marjorie Bruder\*

Brazilian Biosciences National Laboratory, Brazilian Center for Research in Energy and Materials, Campinas-SP, Brazil

**SUPPORTING INFORMATION - ANNEX**

NMR spectra for compounds 3-42 and 45-50

BrEA (3) – <sup>1</sup>H – CDCl<sub>3</sub> – 250 MHz

— 7.26

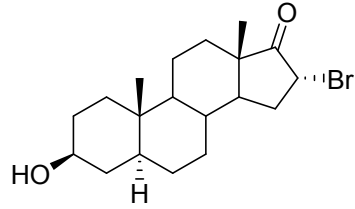

4.53  
4.51

3.68  
3.60  
3.52  
3.47

2.26  
2.23  
2.20  
2.18  
2.16  
2.13  
2.10  
2.07  
1.90

0.89  
0.82  
0.74

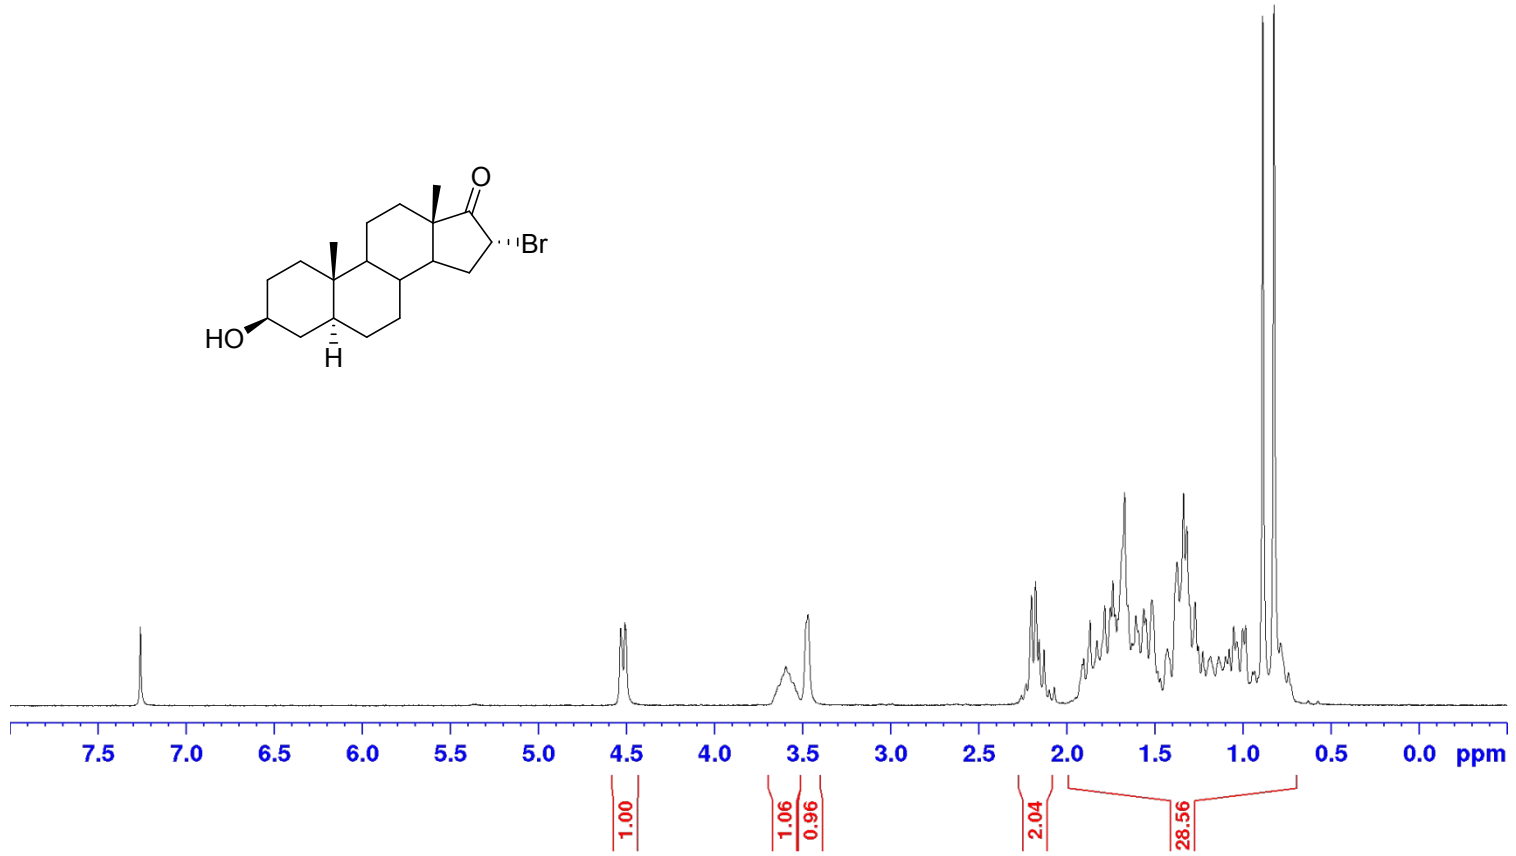

— 213.5

BrEA (3) —  $^{13}\text{C}$  —  $\text{CDCl}_3$  — 62.5 MHz

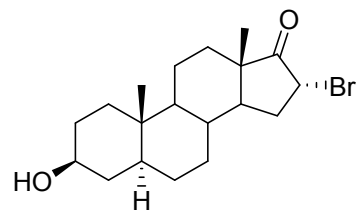

77.5  
77.0  
76.5  
71.0  
54.2  
47.9  
47.8  
46.3  
44.7  
37.9  
36.8  
35.6  
34.3  
34.0  
32.3  
31.3  
30.7  
28.2  
20.3  
14.2  
12.2

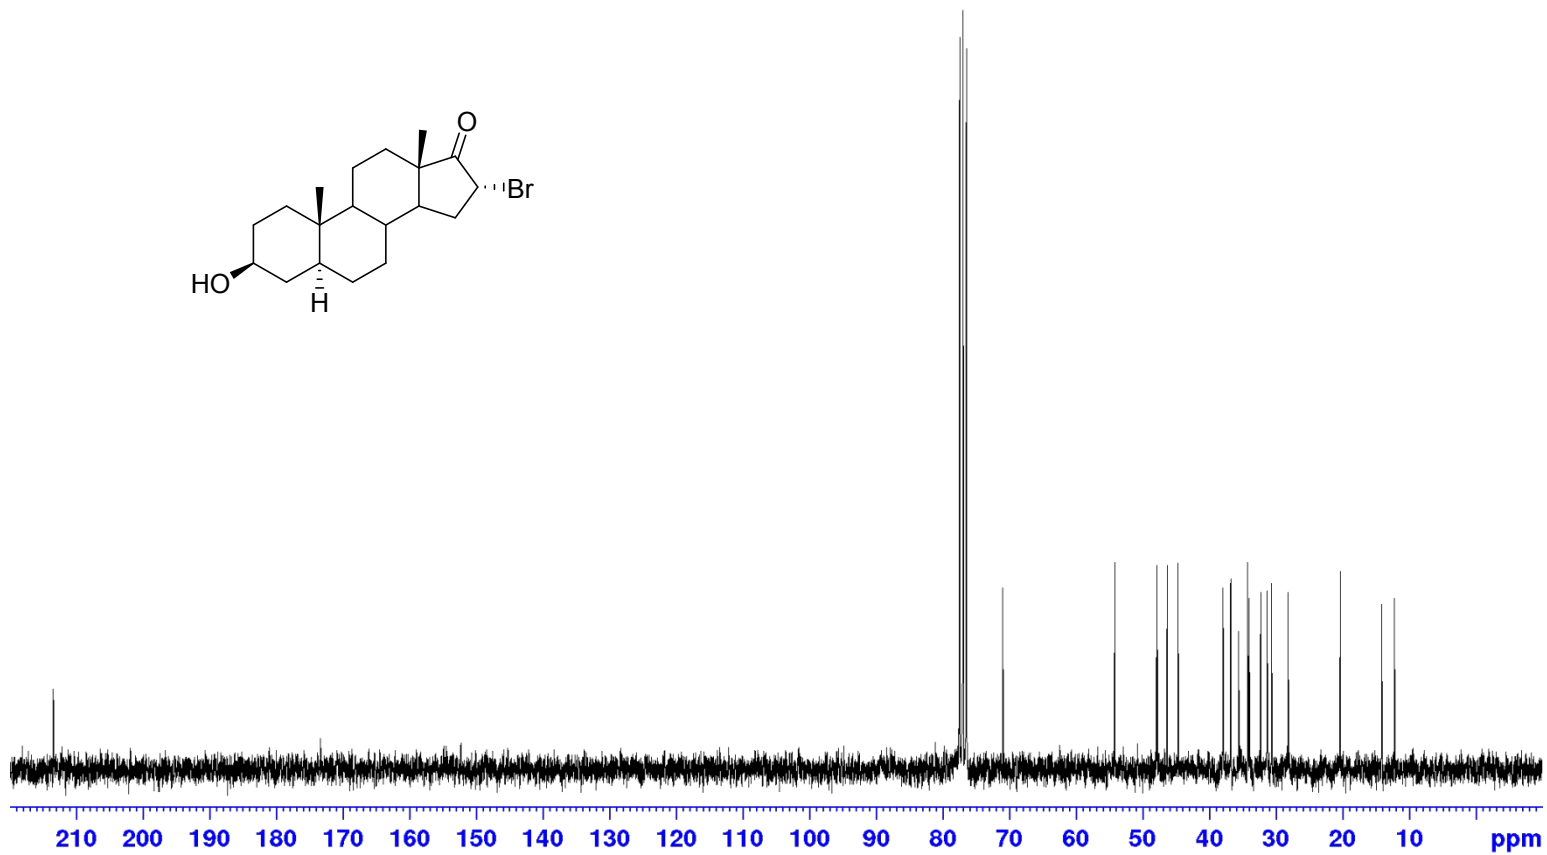

FEA (4) – <sup>1</sup>H – CDCl<sub>3</sub> – 250 MHz

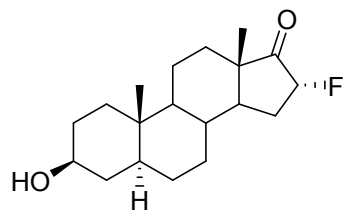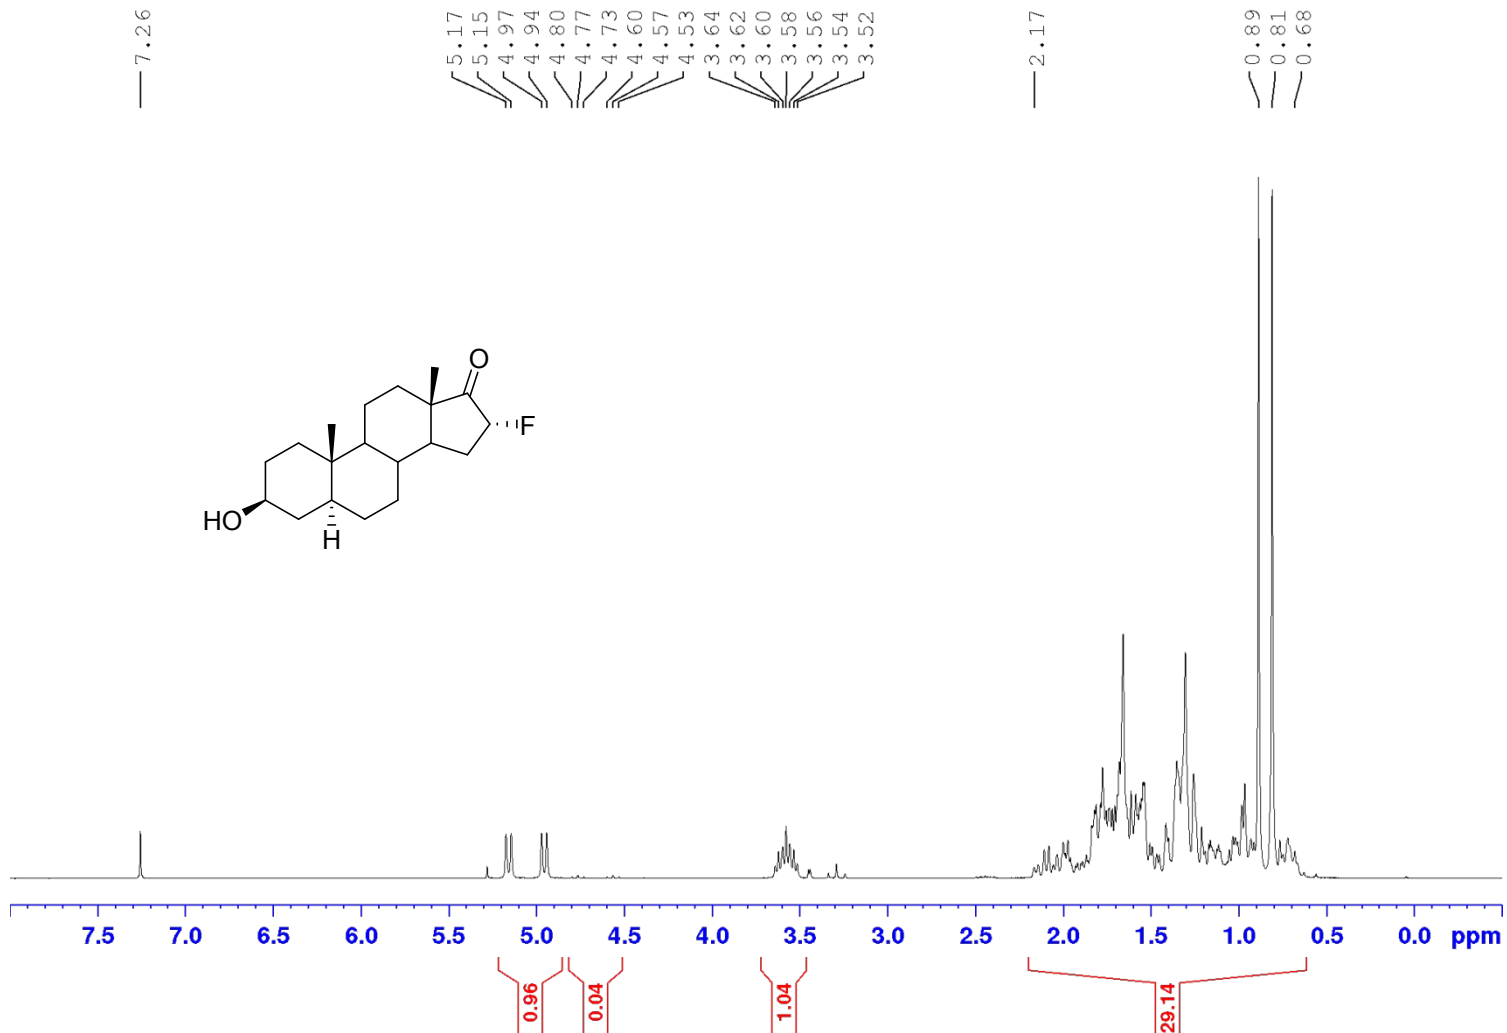

FEA (4) –  $^{13}\text{C}$  –  $\text{CDCl}_3$  – 62.5 MHz

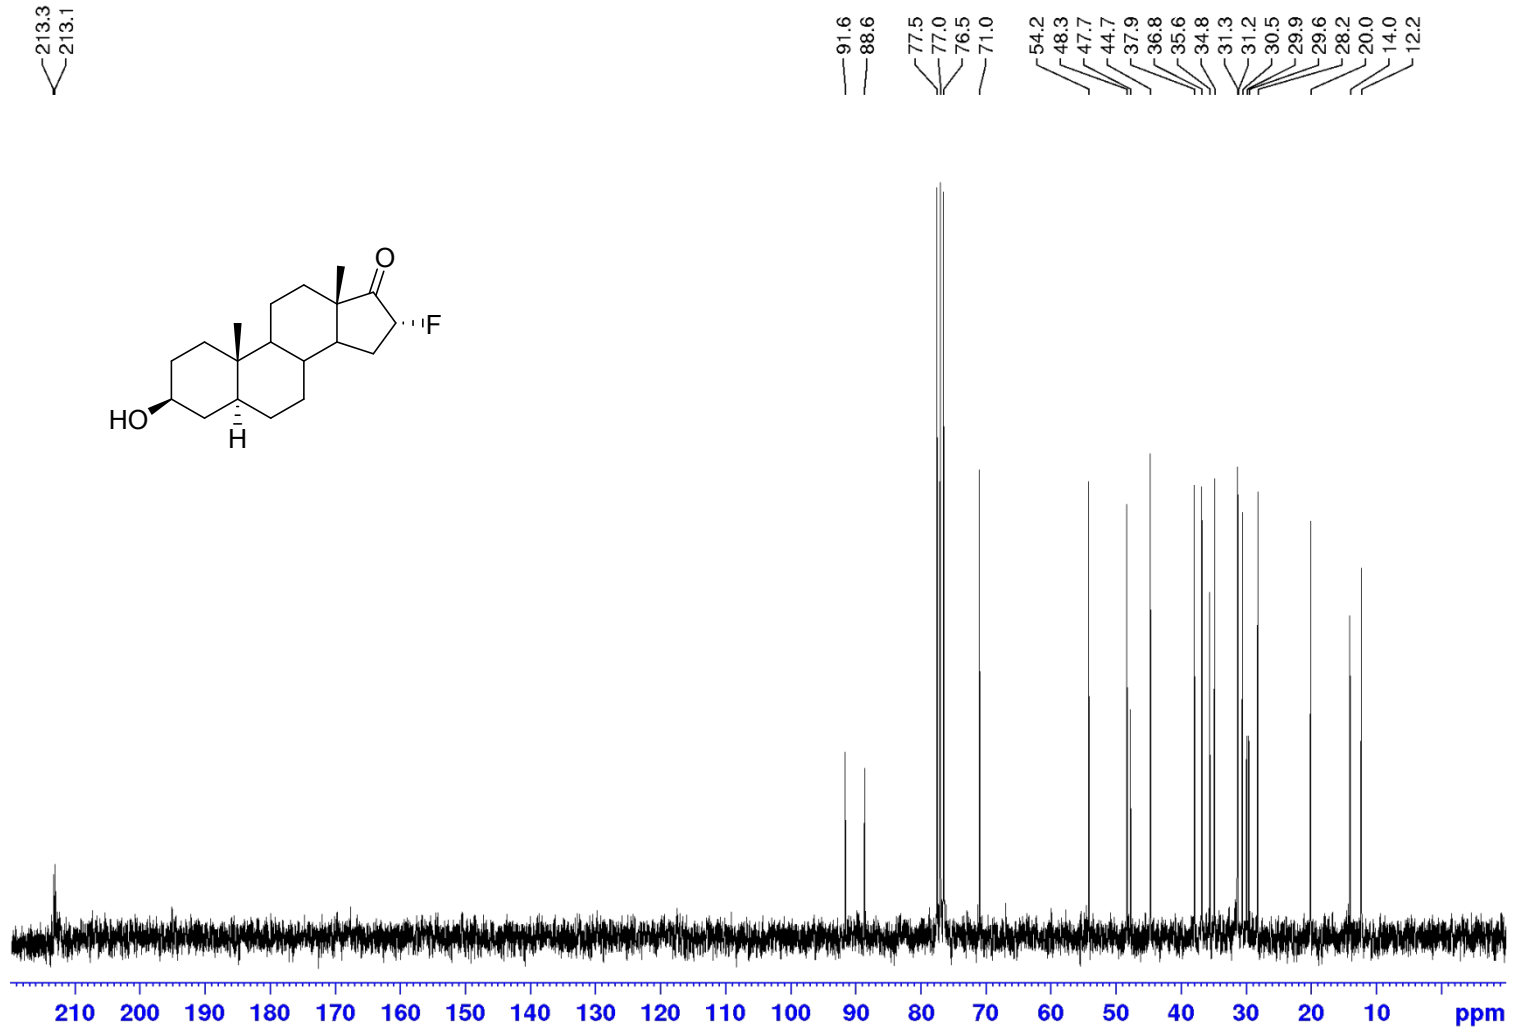

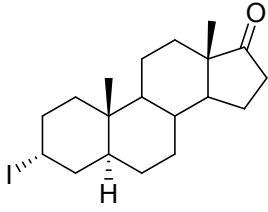

3-IEA - <sup>1</sup>H - CDCl<sub>3</sub> - 250 MHz

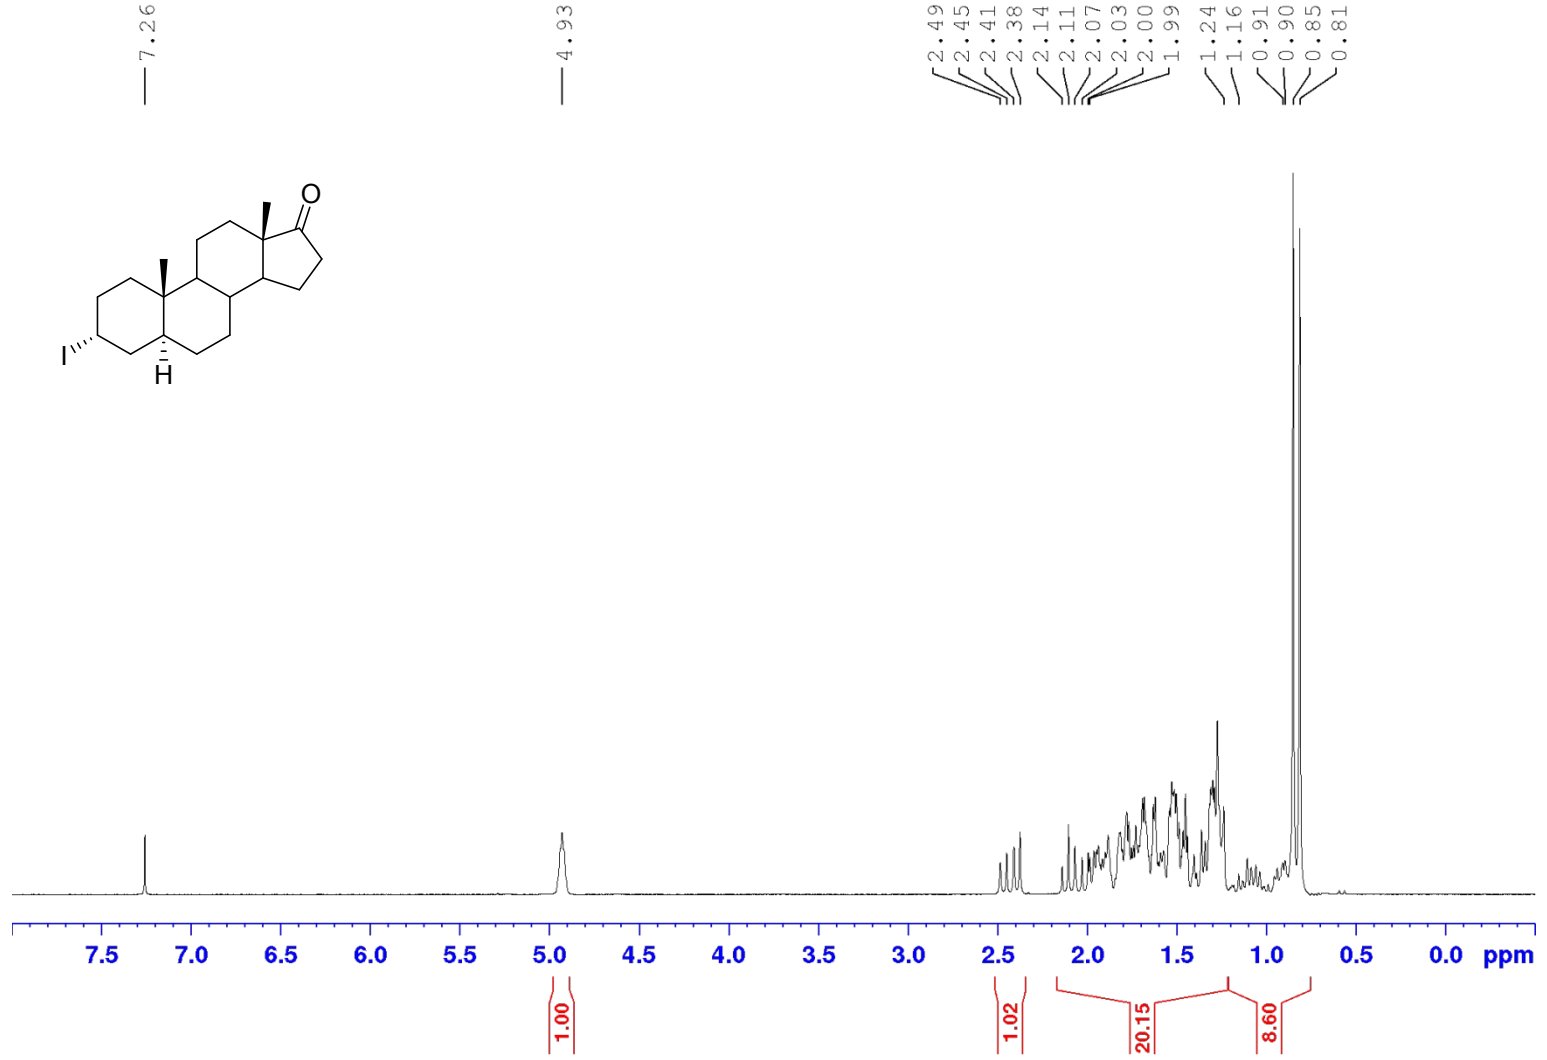

3-IEA - <sup>13</sup>C - CDCl<sub>3</sub> - 62.5 MHz

—221.1

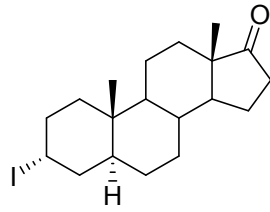

77.5  
77.0  
76.5  
53.9  
51.4  
47.7  
42.0  
38.6  
37.6  
36.6  
35.8  
34.9  
34.3  
32.6  
31.5  
30.6  
27.4  
21.7  
20.0  
13.8  
13.3

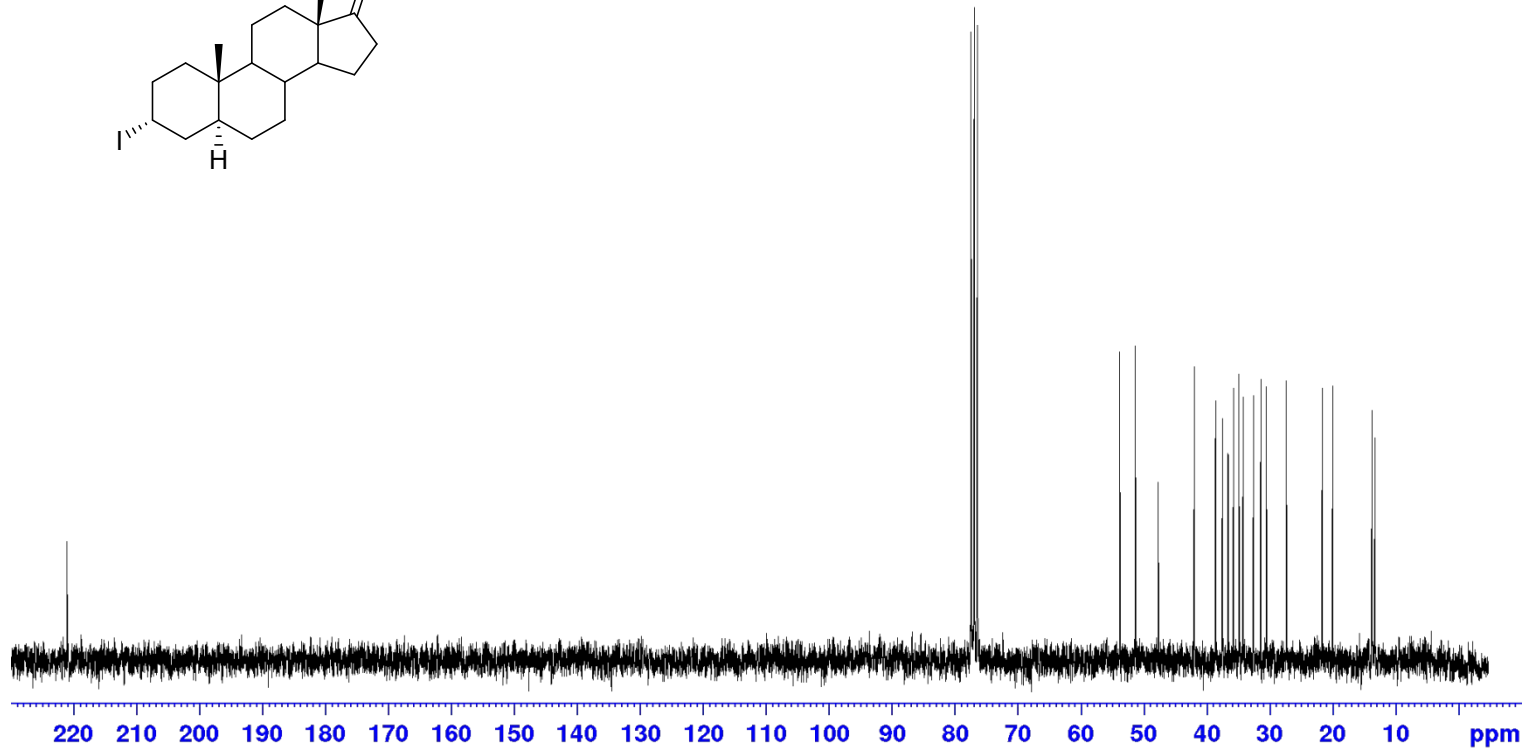

dEA (5) – <sup>1</sup>H – CDCl<sub>3</sub> – 250 MHz

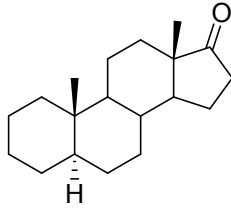

— 7.26

2.47  
2.36  
2.11  
1.96  
1.86  
1.79  
1.14  
1.10  
0.84  
0.79  
0.66

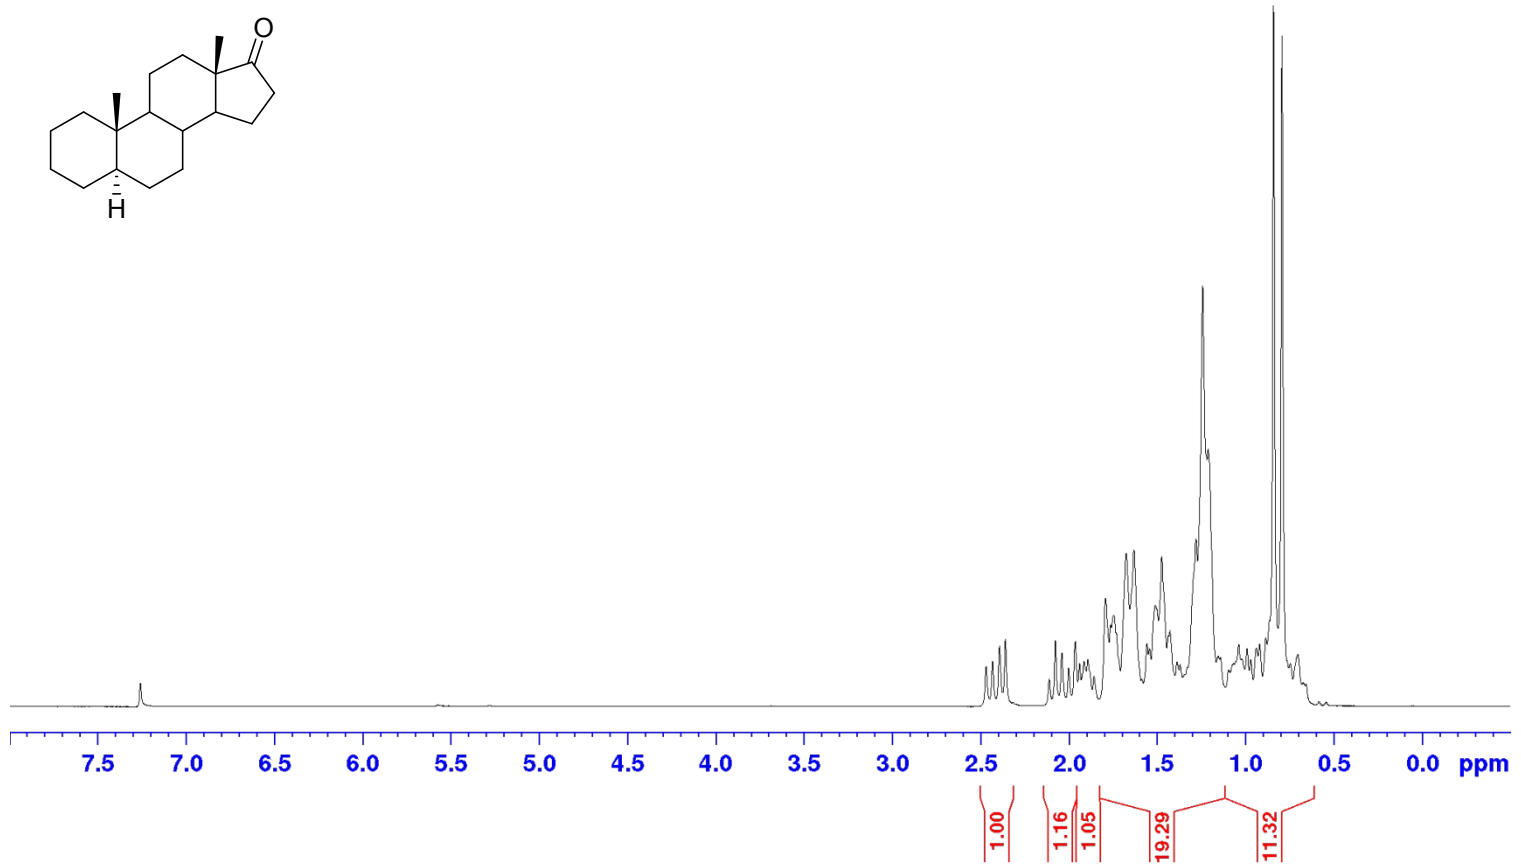



dEA (5) –  $^{13}\text{C}$  –  $\text{CDCl}_3$  – 62.5 MHz

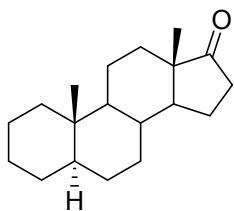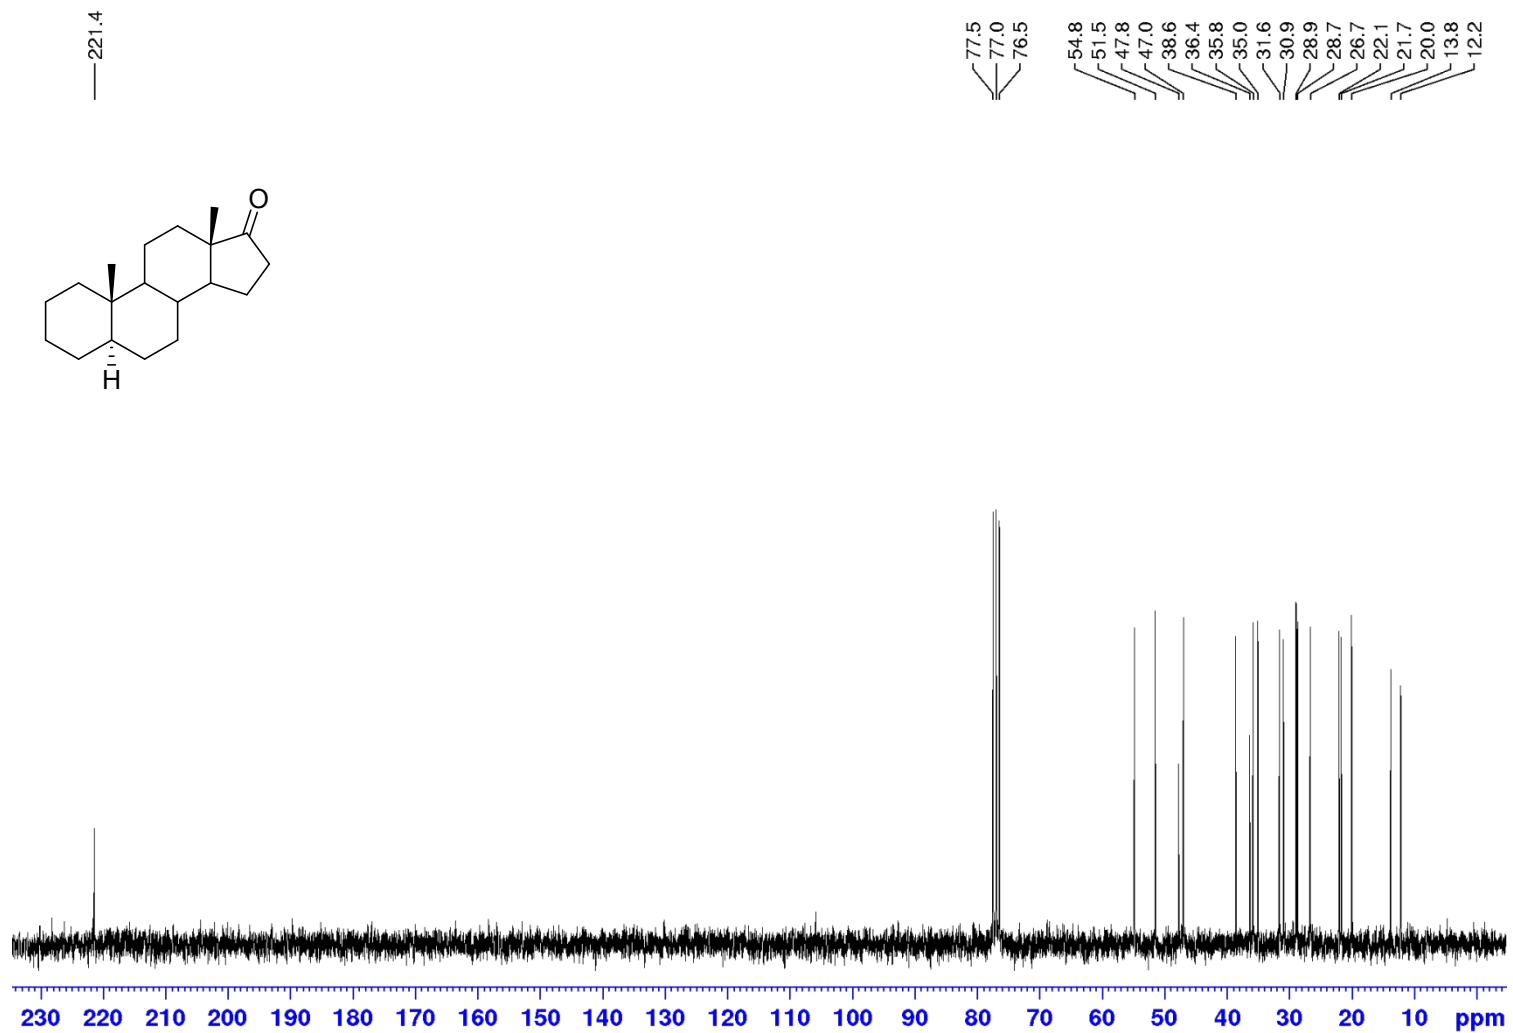

dBrEA (6) – <sup>1</sup>H – CDCl<sub>3</sub> – 250 MHz

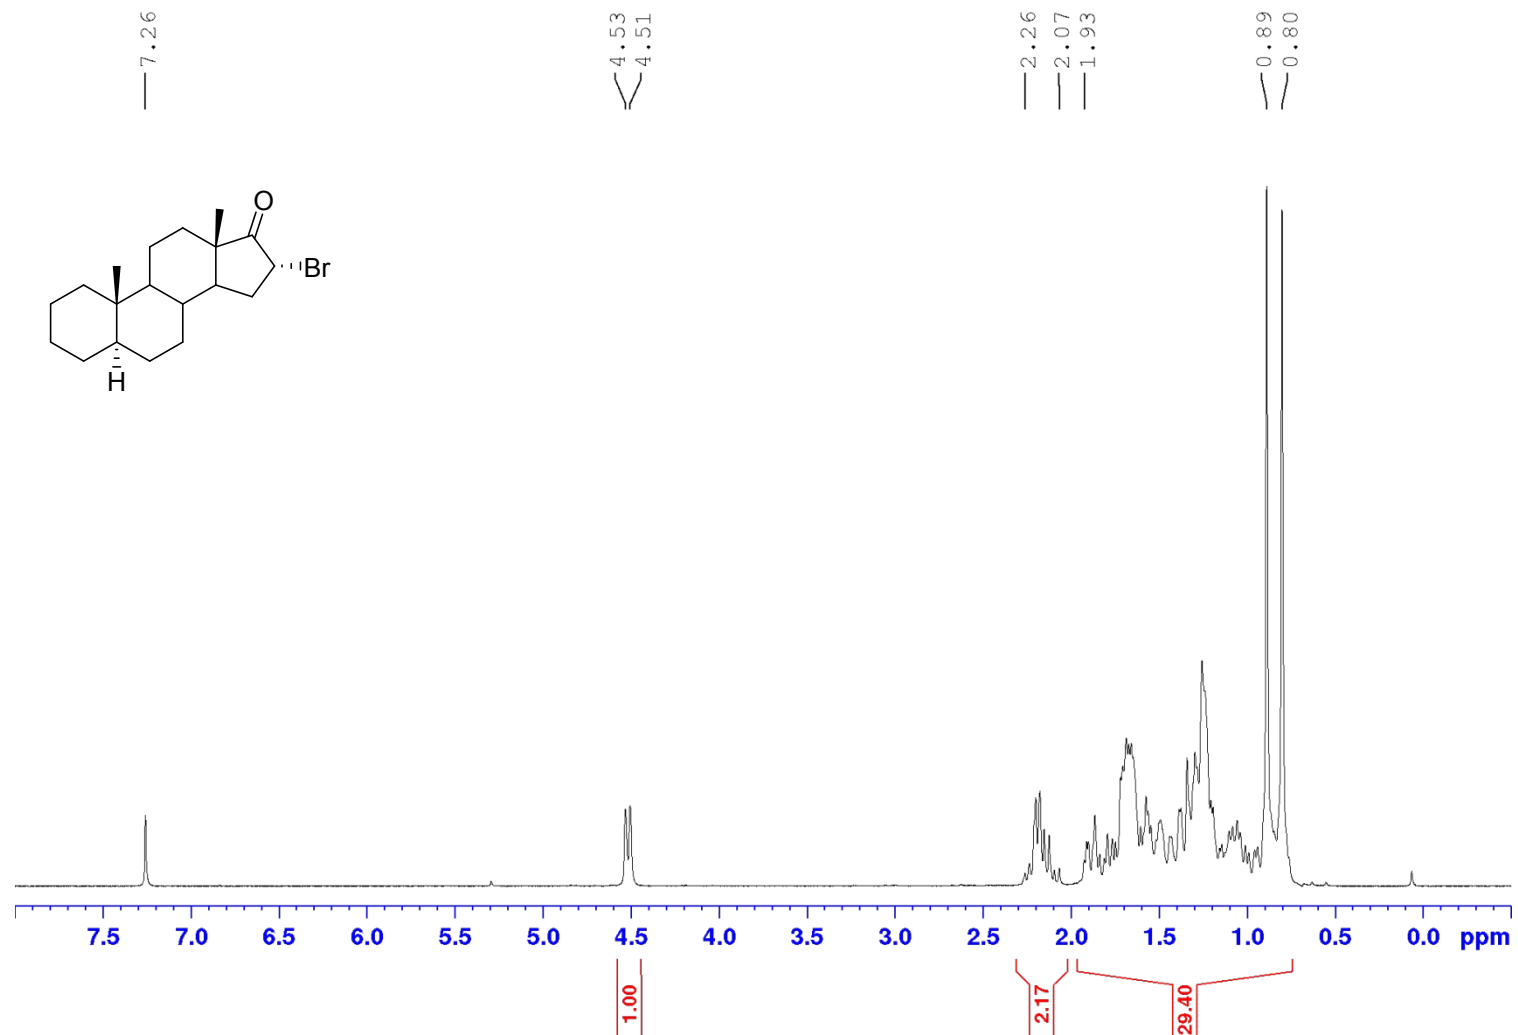

dBrEA (6) –  $^{13}\text{C}$  –  $\text{CDCl}_3$  – 62.5 MHz

— 213.6

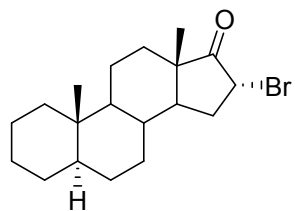

77.5  
77.0  
76.5  
54.6  
48.0  
47.8  
46.9  
46.5  
38.5  
36.4  
34.3  
34.1  
32.4  
30.8  
28.9  
28.6  
26.7  
22.1  
19.9  
14.2  
12.1

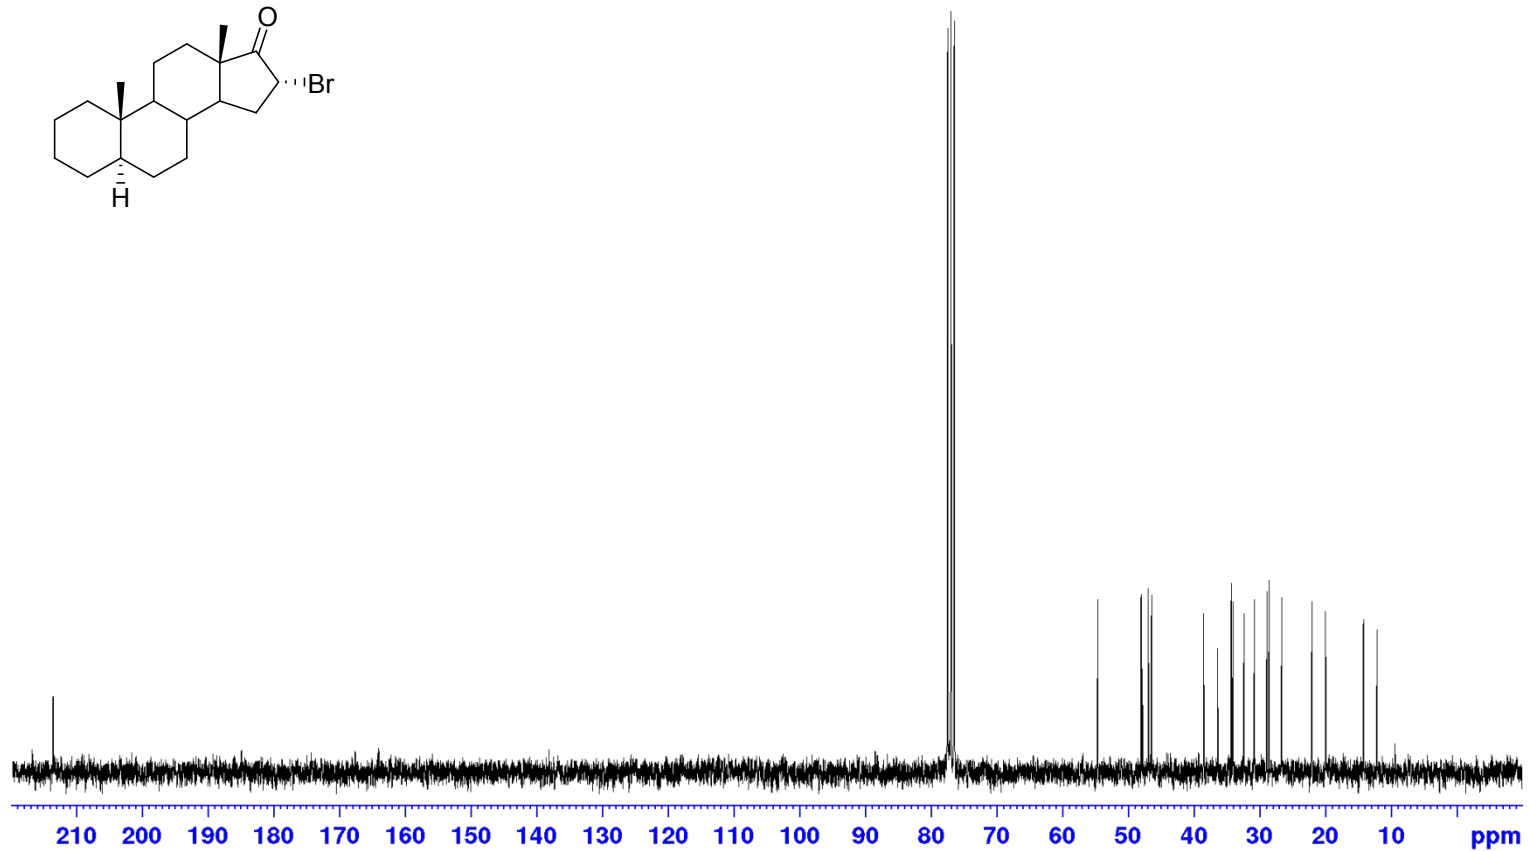

dFEA (7) - <sup>1</sup>H - CDCl<sub>3</sub> - 250 MHz

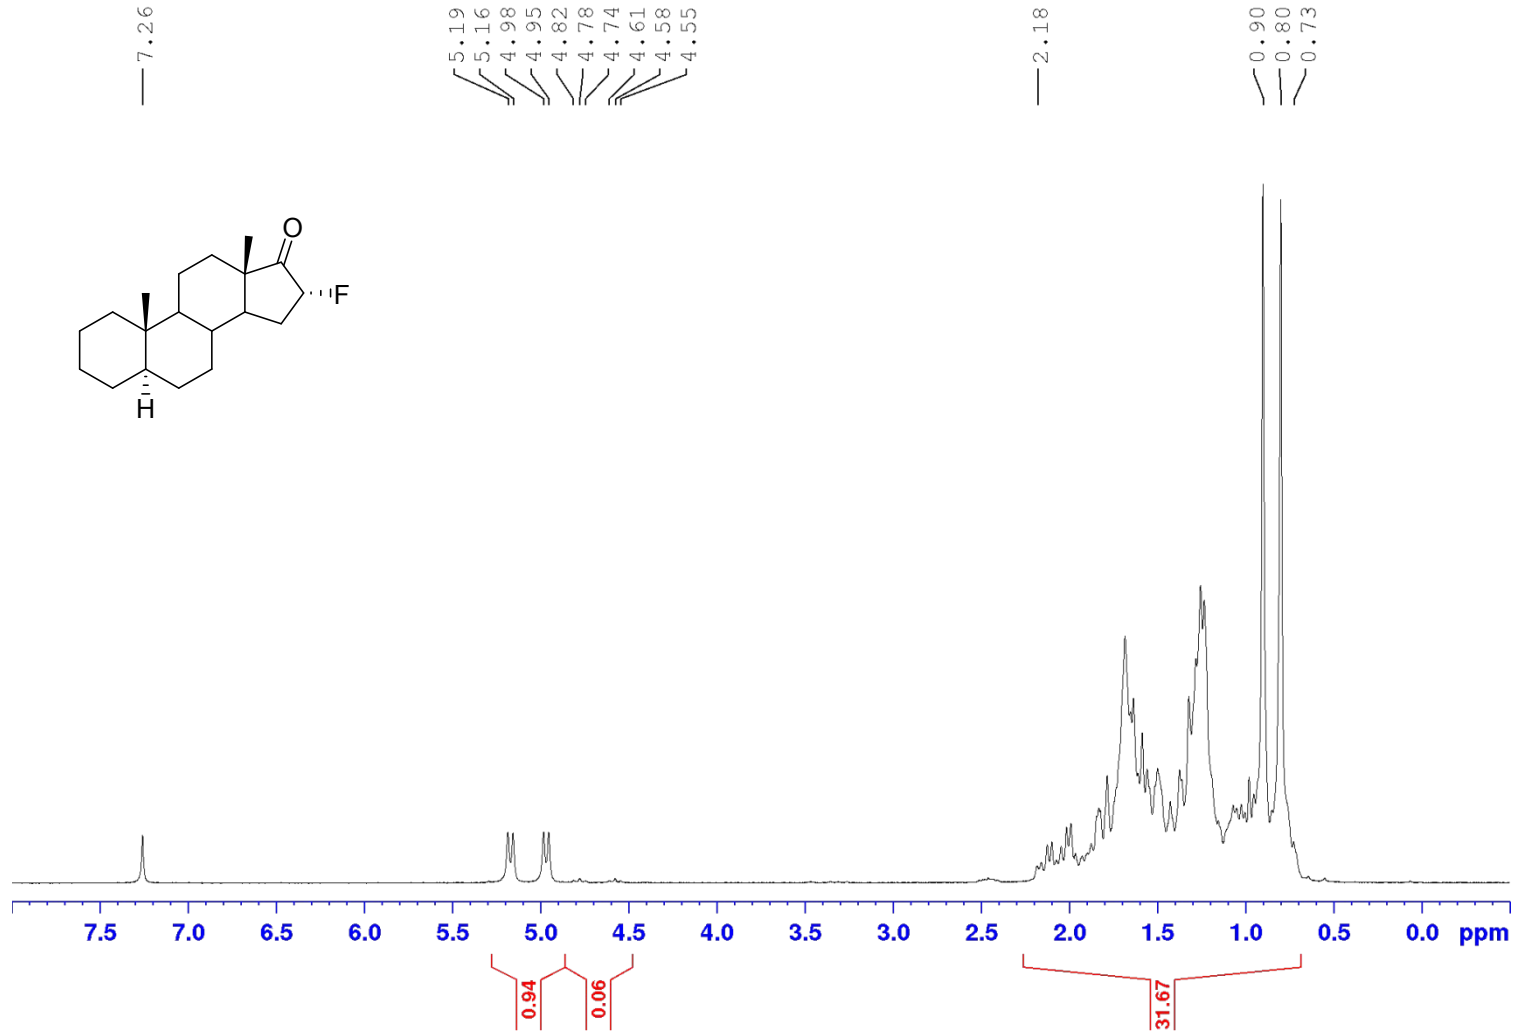

dFEA (7) – <sup>13</sup>C – CDCl<sub>3</sub> – 62.5 MHz

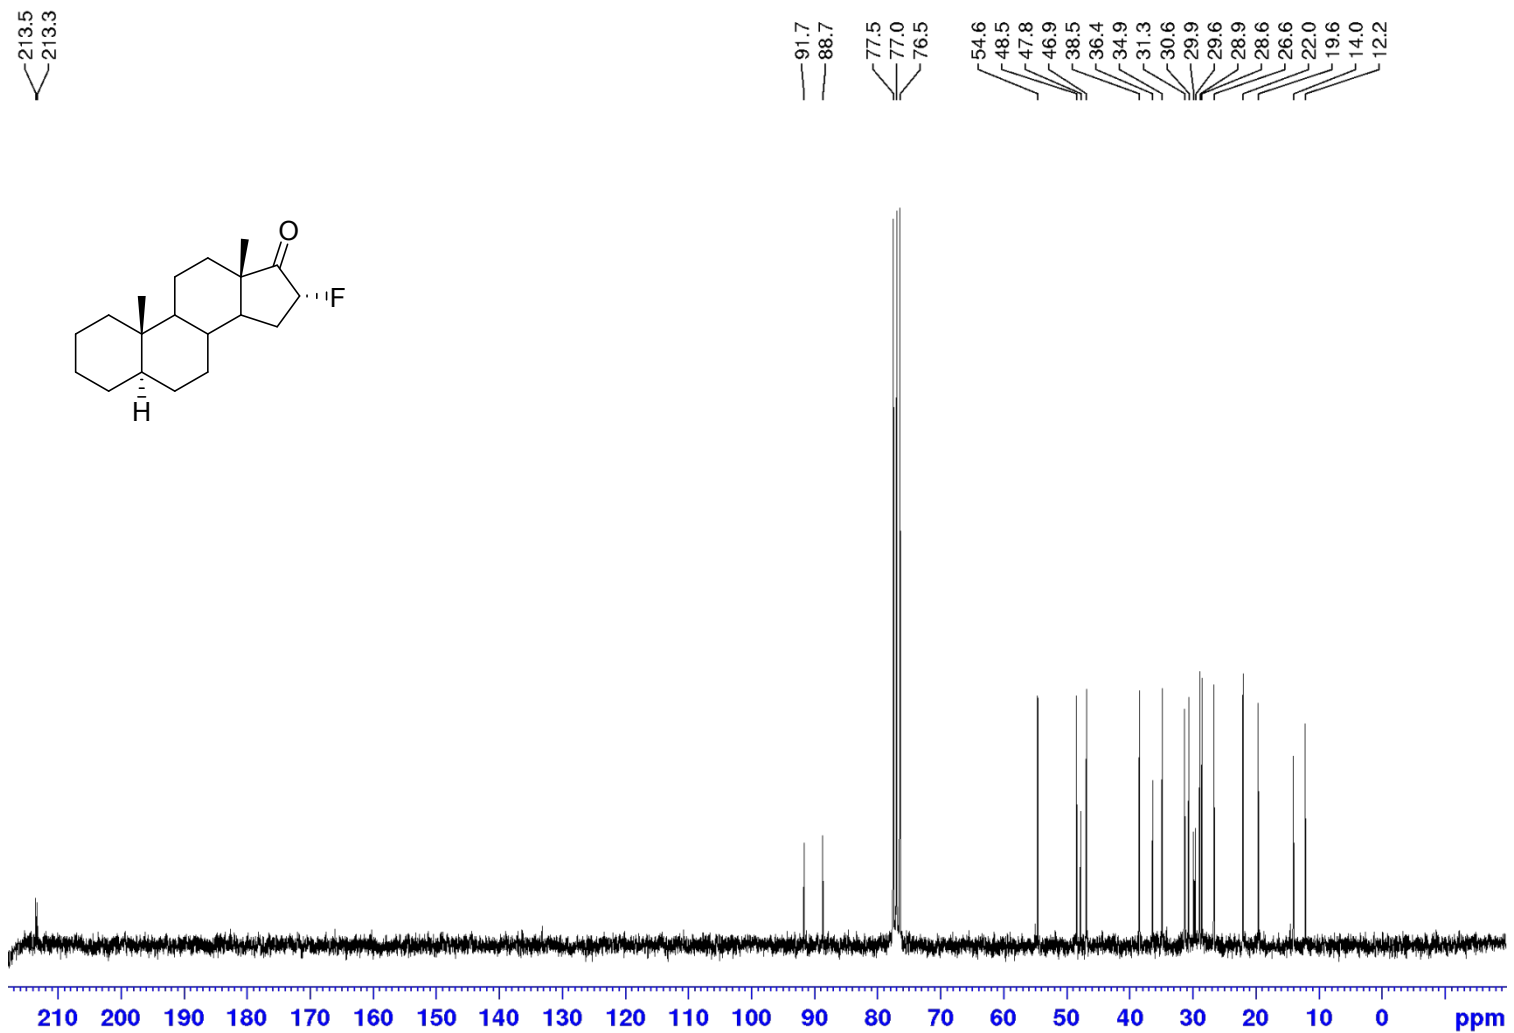

Epiandrosterone acetate (8) – <sup>1</sup>H – CDCl<sub>3</sub> – 250 MHz

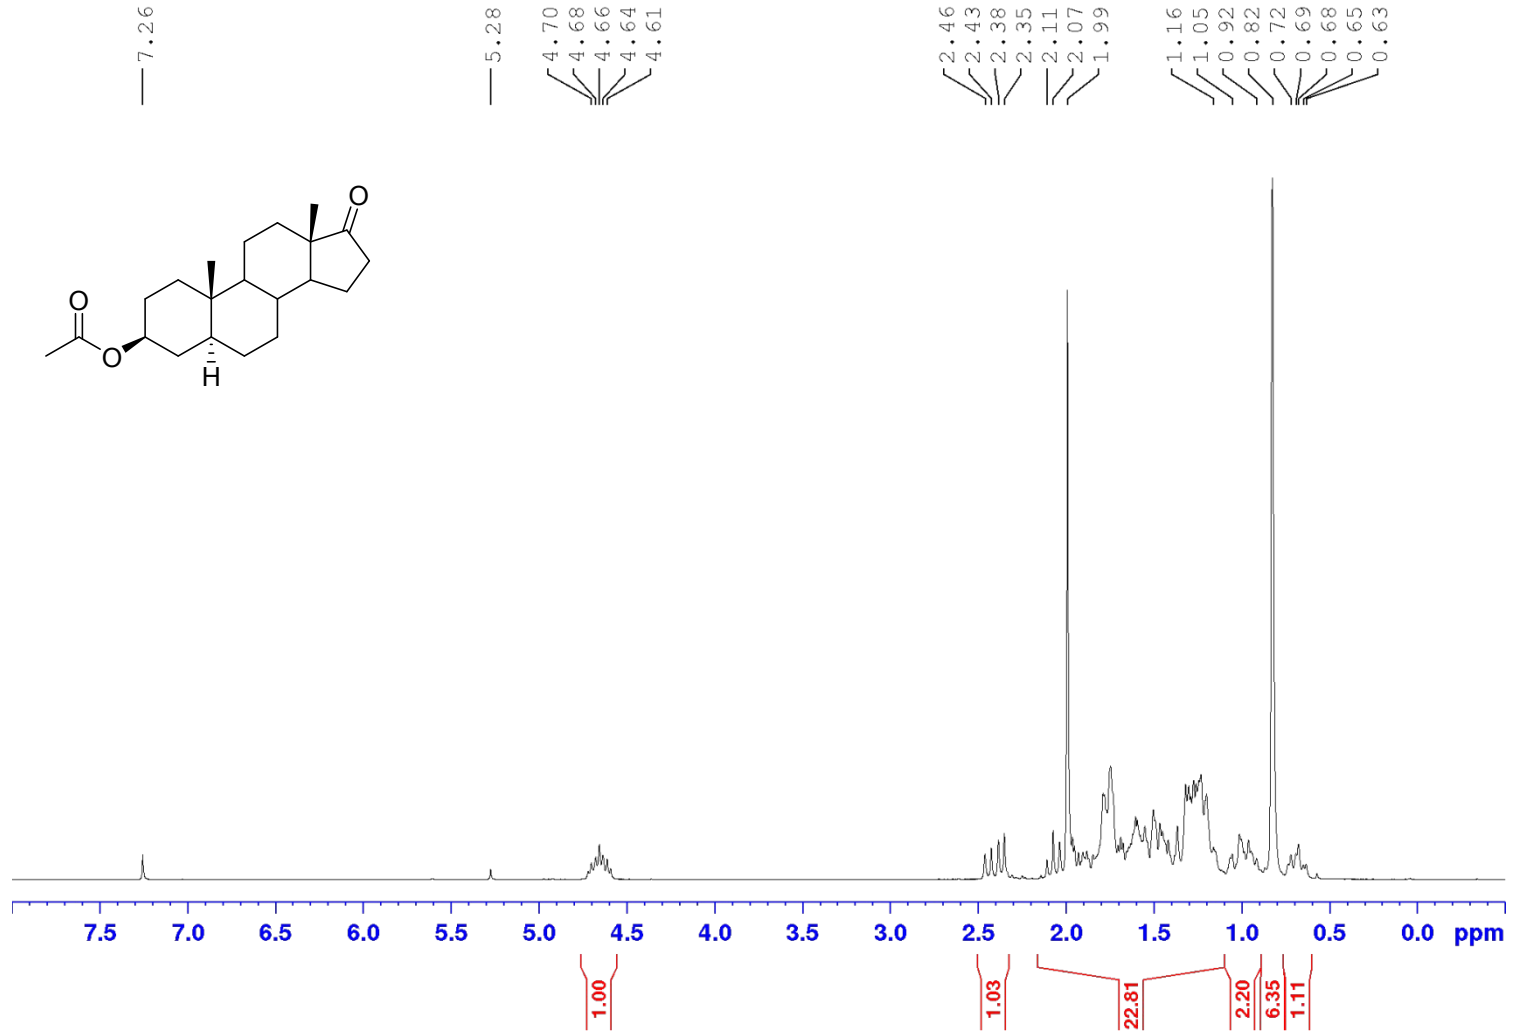

Epiandrosterone acetate (8) –  $^{13}\text{C}$  –  $\text{CDCl}_3$  – 62.5 MHz

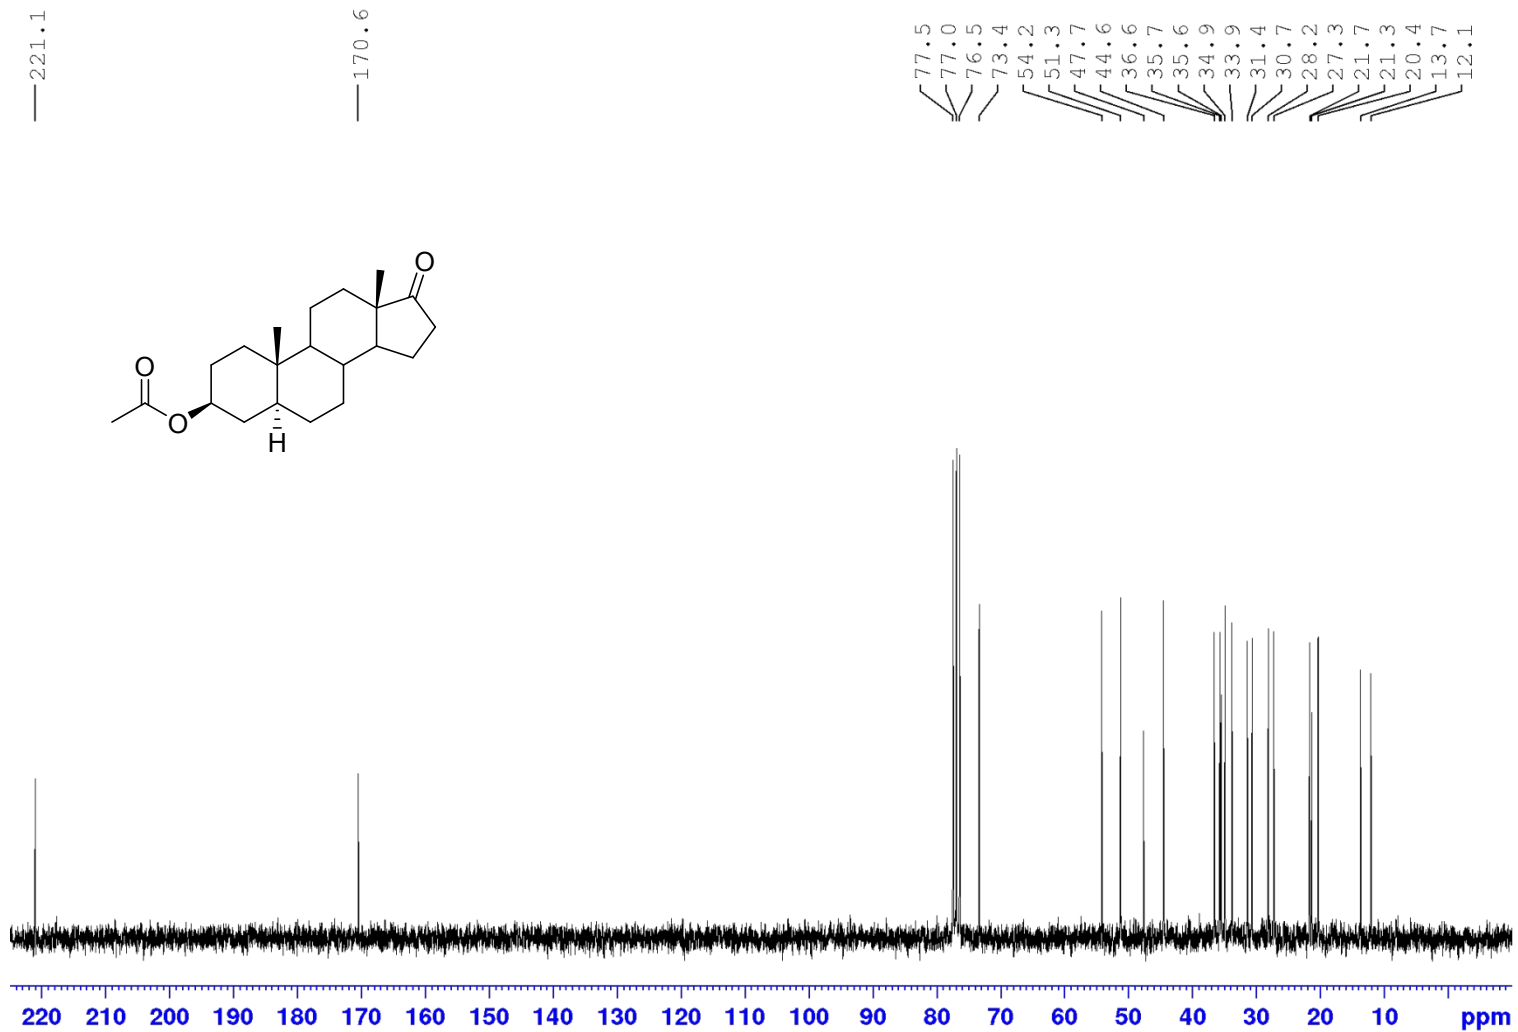

—221.1

—170.6

77.5  
77.0  
76.5  
73.4  
54.2  
51.3  
47.7  
44.6  
36.6  
35.7  
35.6  
34.9  
33.9  
31.4  
30.7  
28.2  
27.3  
21.7  
21.3  
20.4  
13.7  
12.1

Epiandrosterone but-3-enoate (9) – <sup>1</sup>H – CDCl<sub>3</sub> – 250 MHz

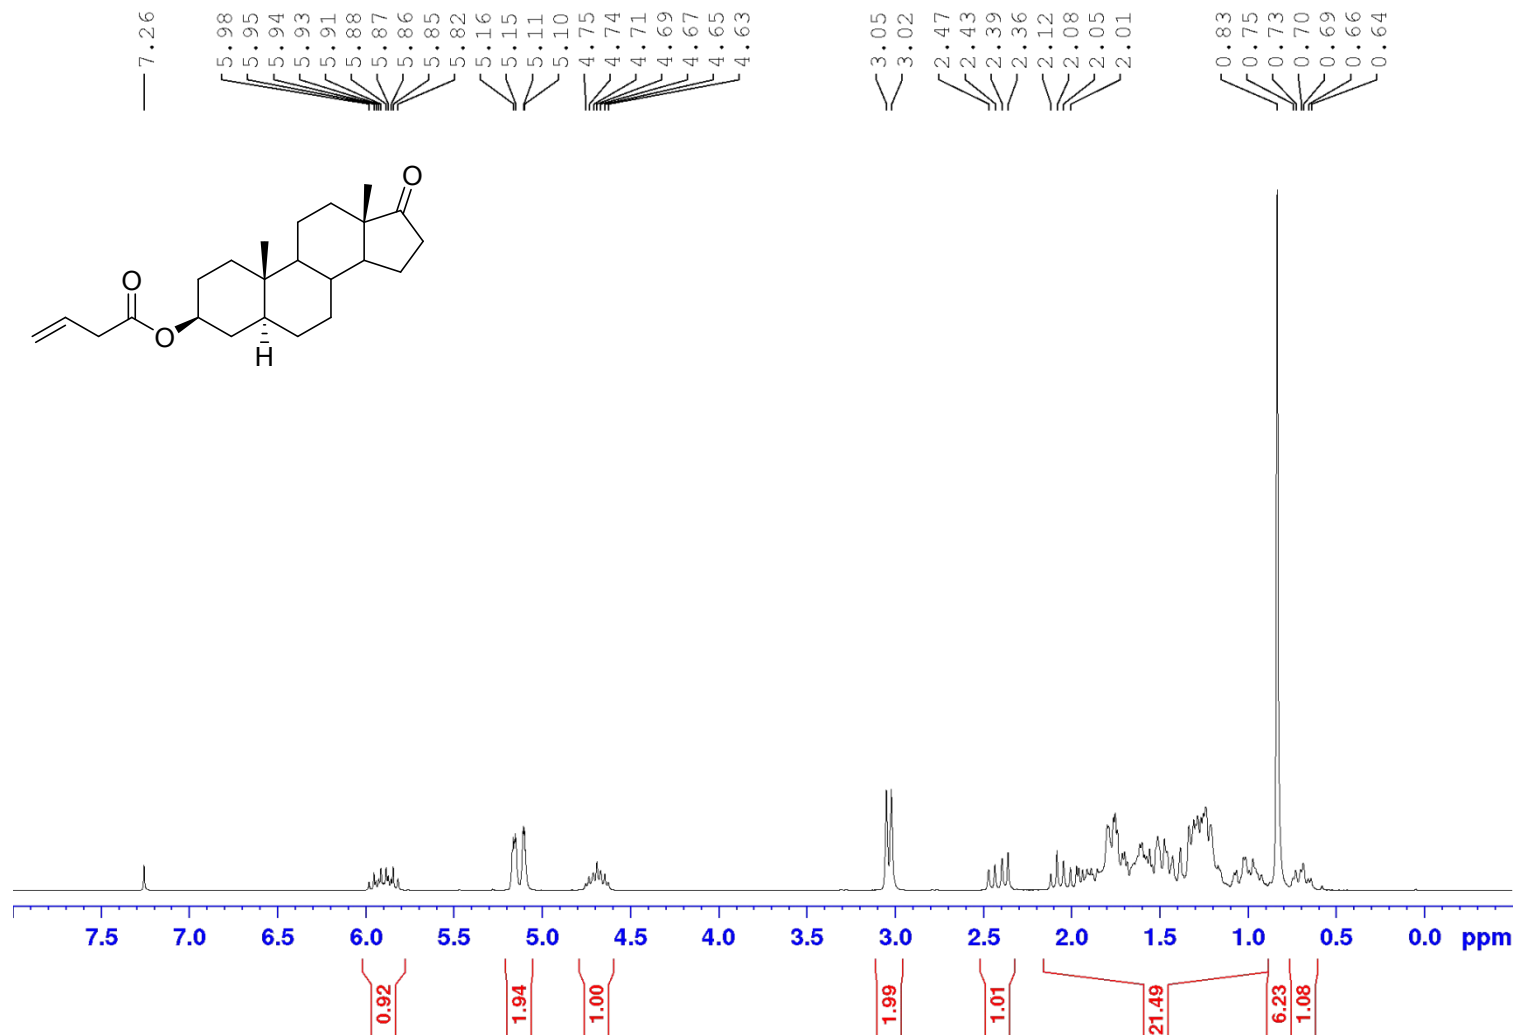



Epiandrosterone but-3-enoate (9) –  $^{13}\text{C}$  –  $\text{CDCl}_3$  – 62.5 MHz

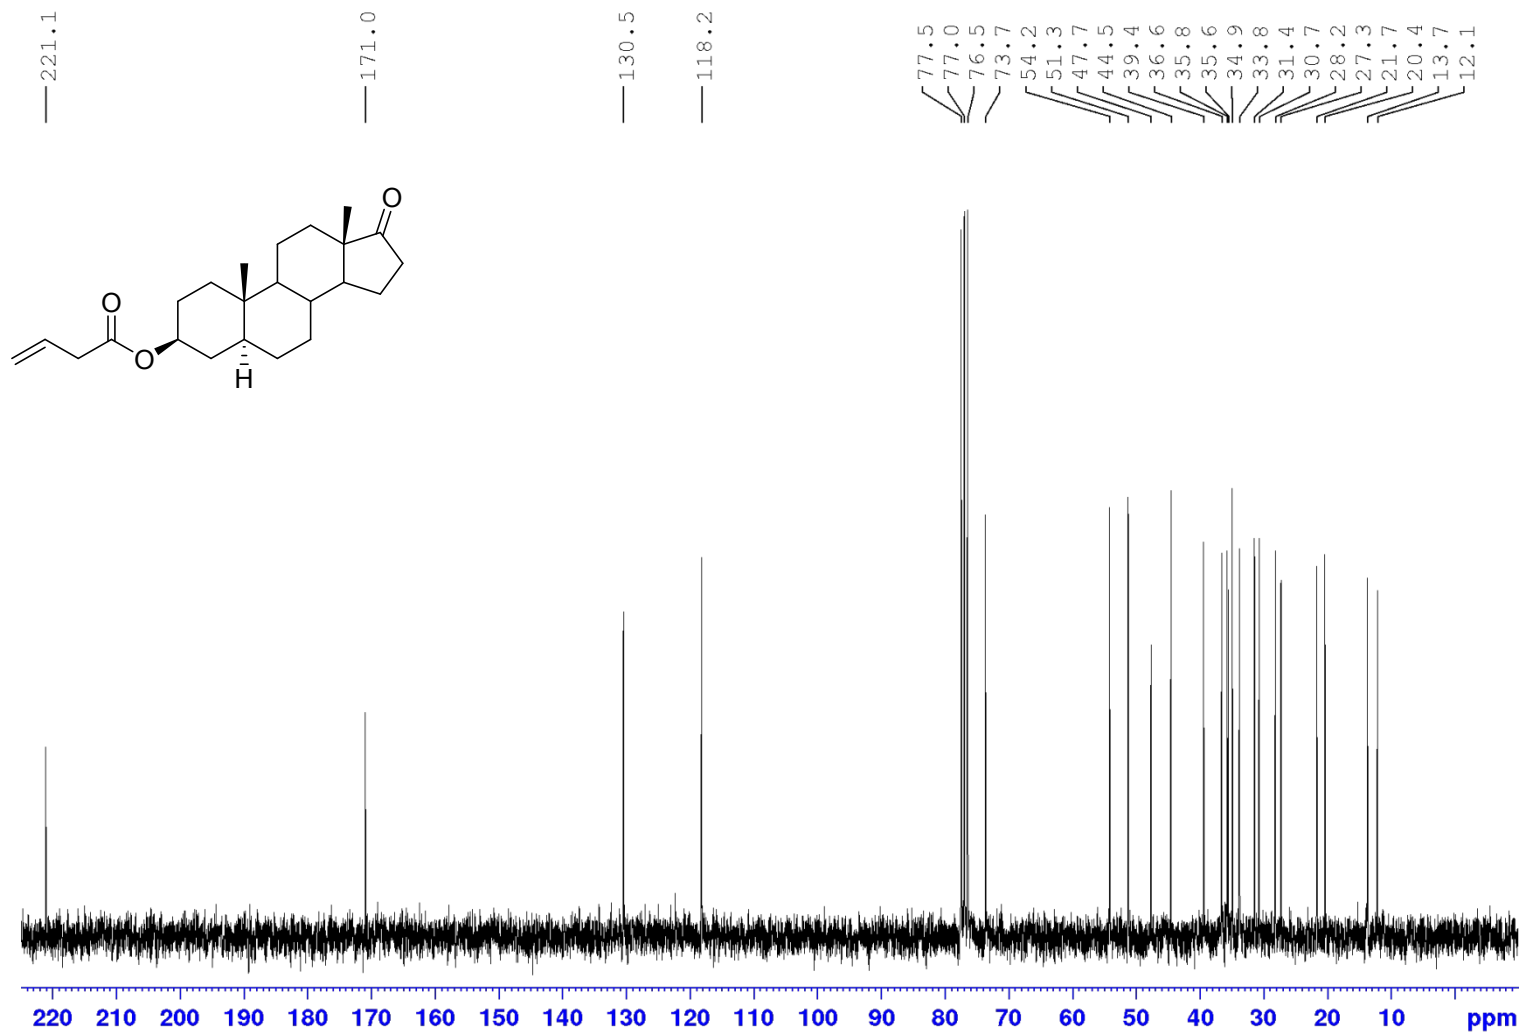

Epiandrosterone isobutyrate (10) –  $^1\text{H}$  –  $\text{CDCl}_3$  – 500 MHz

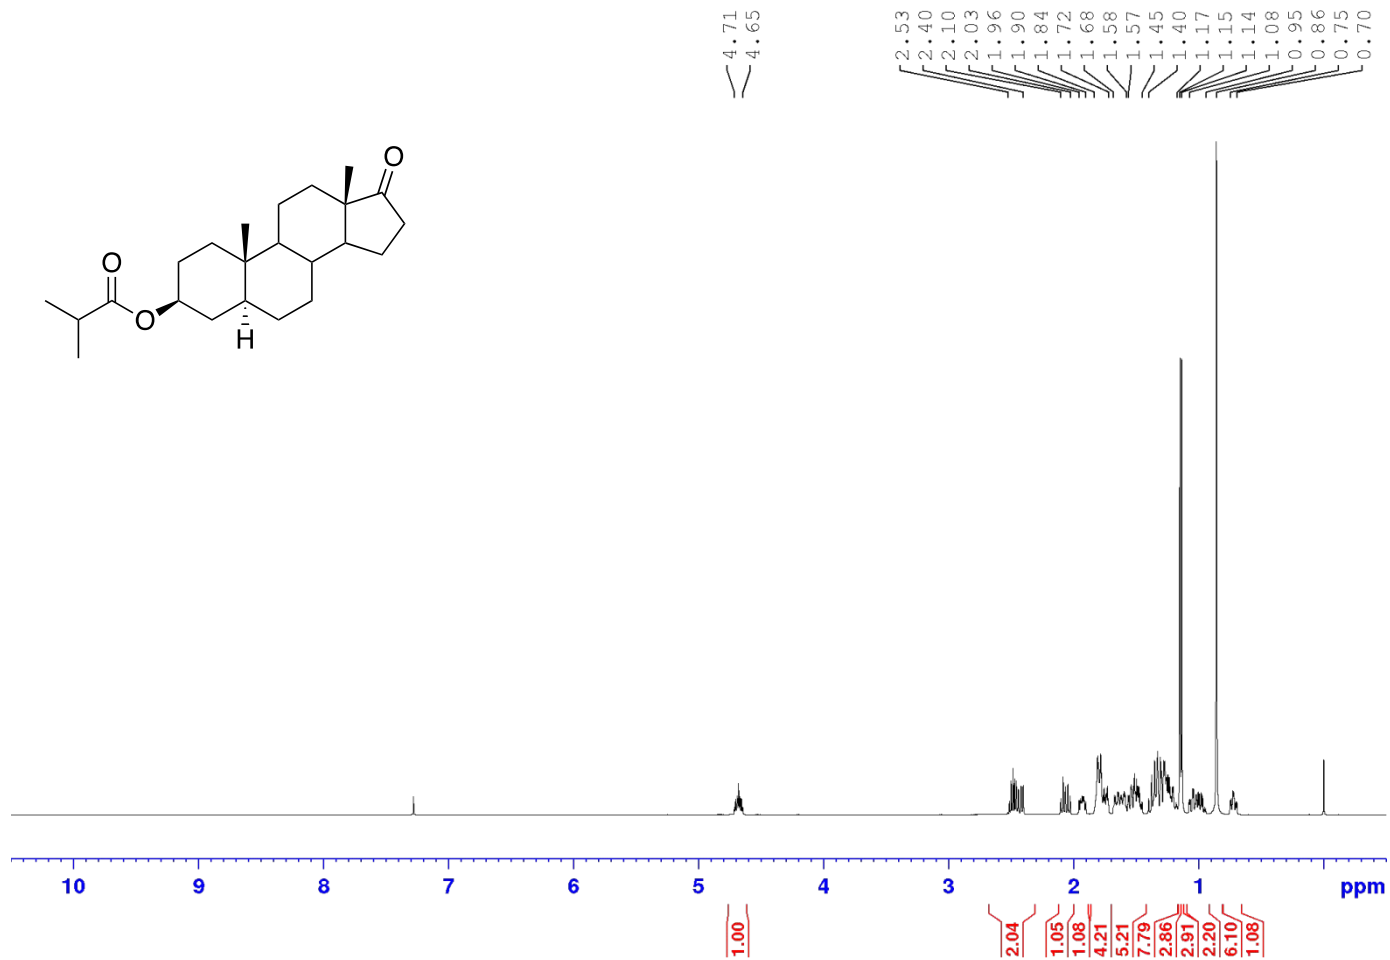

Epiandrosterone isobutyrate (10) –  $^{13}\text{C}$  –  $\text{CDCl}_3$  – 125 MHz

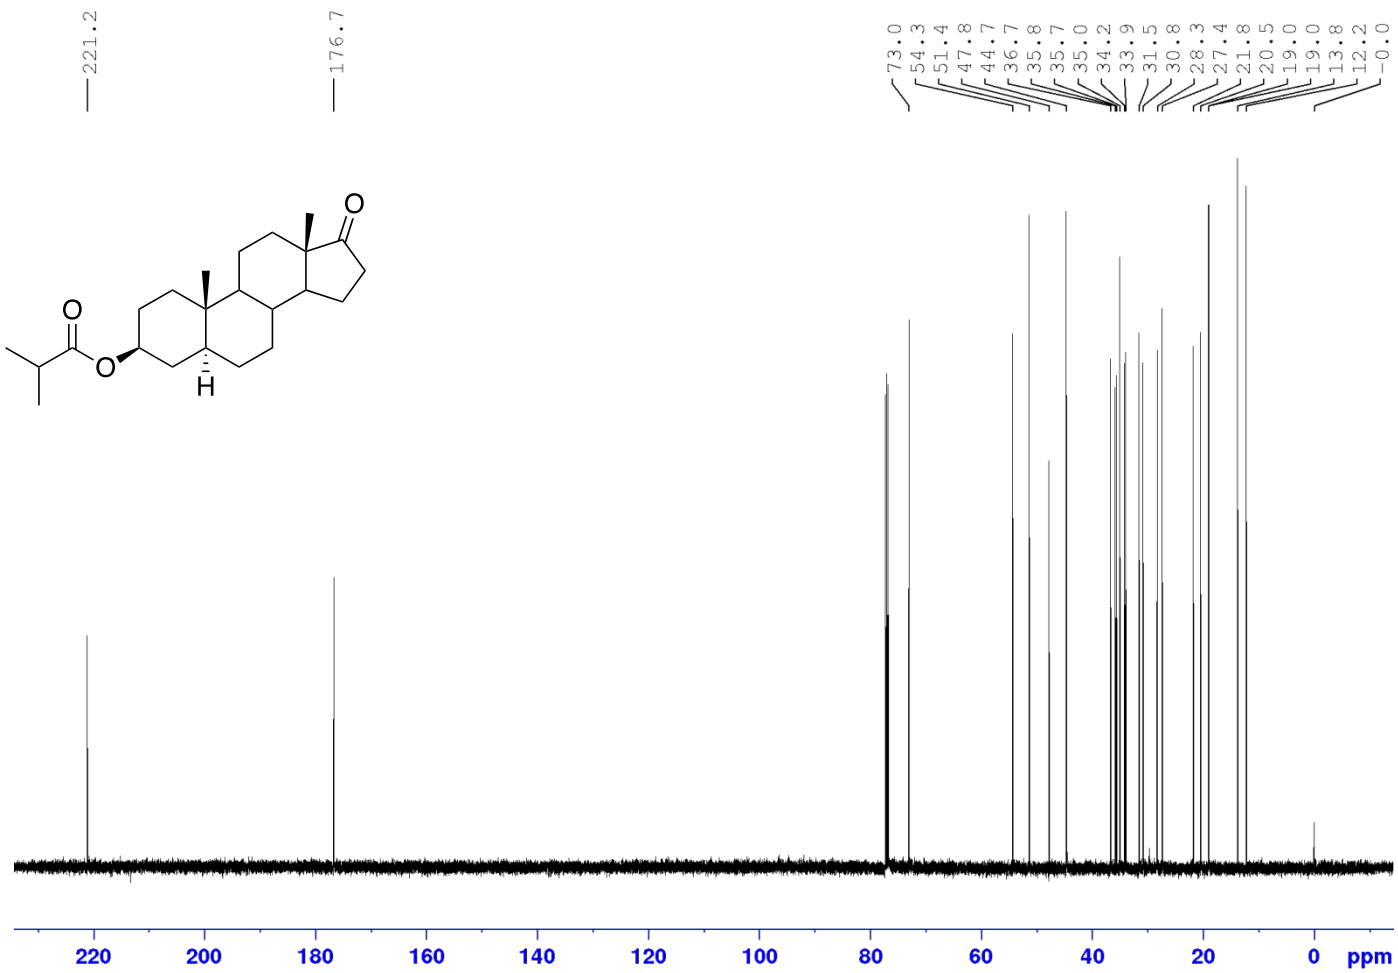

Epiandrosterone methanesulfonate (11) – <sup>1</sup>H – CDCl<sub>3</sub> – 250 MHz

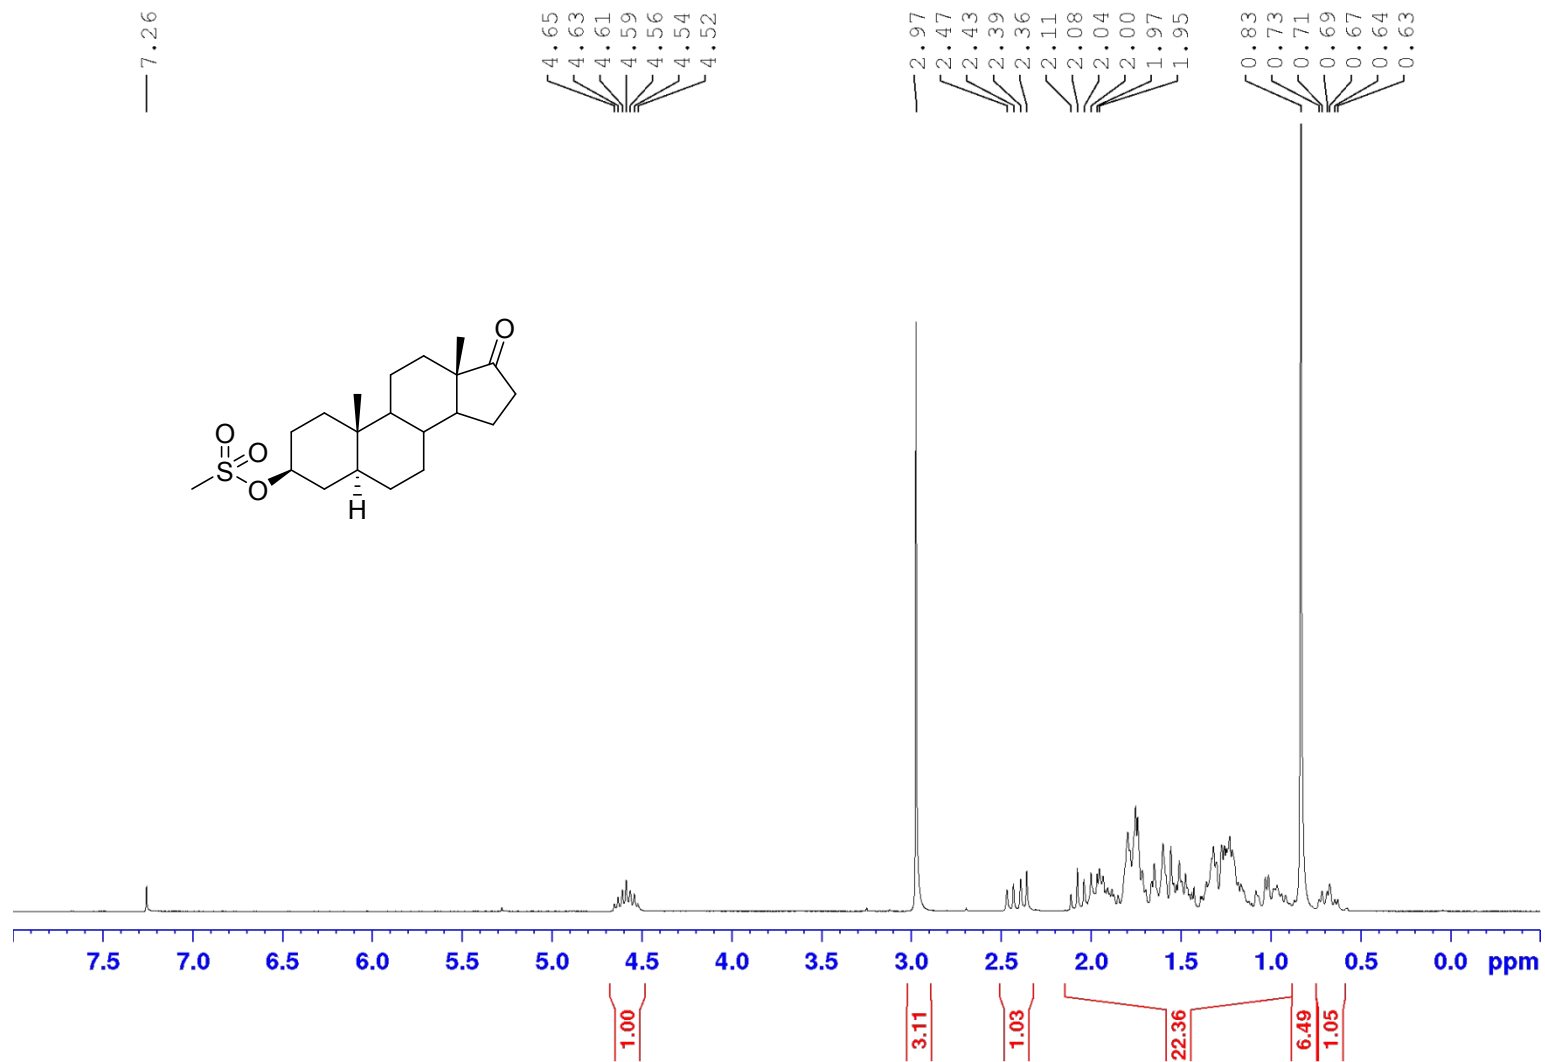

— 7.26

4.65  
4.63  
4.61  
4.59  
4.56  
4.54  
4.52

2.97  
2.47  
2.43  
2.39  
2.36  
2.11  
2.08  
2.04  
2.00  
1.97  
1.95

0.83  
0.73  
0.71  
0.69  
0.67  
0.64  
0.63

1.00

3.11

1.03

22.36

6.49

1.05

— 220.9

Epiandrosterone methanesulfonate (11) –  $^{13}\text{C}$  –  $\text{CDCl}_3$  – 62.5 MHz

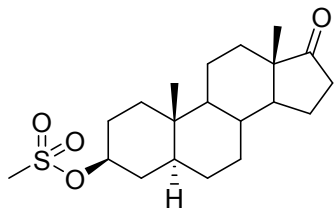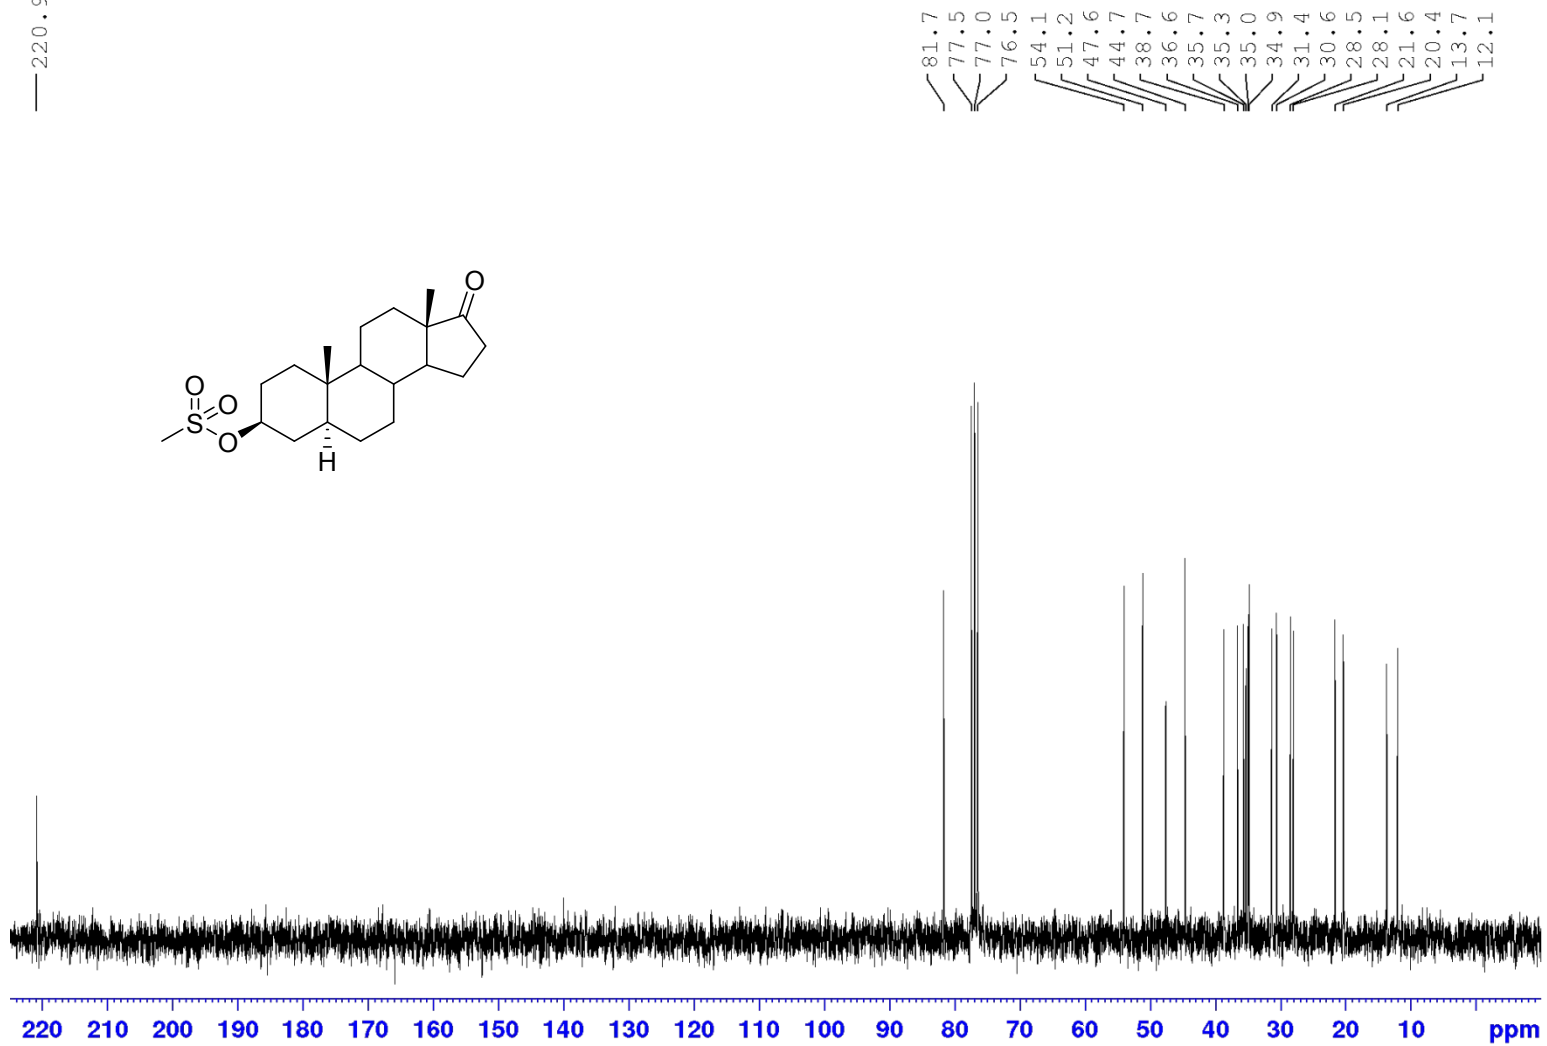

16 $\alpha$ -Bromoepiandrosterone acetate (12) –  $^1\text{H}$  –  $\text{CDCl}_3$  – 250 MHz

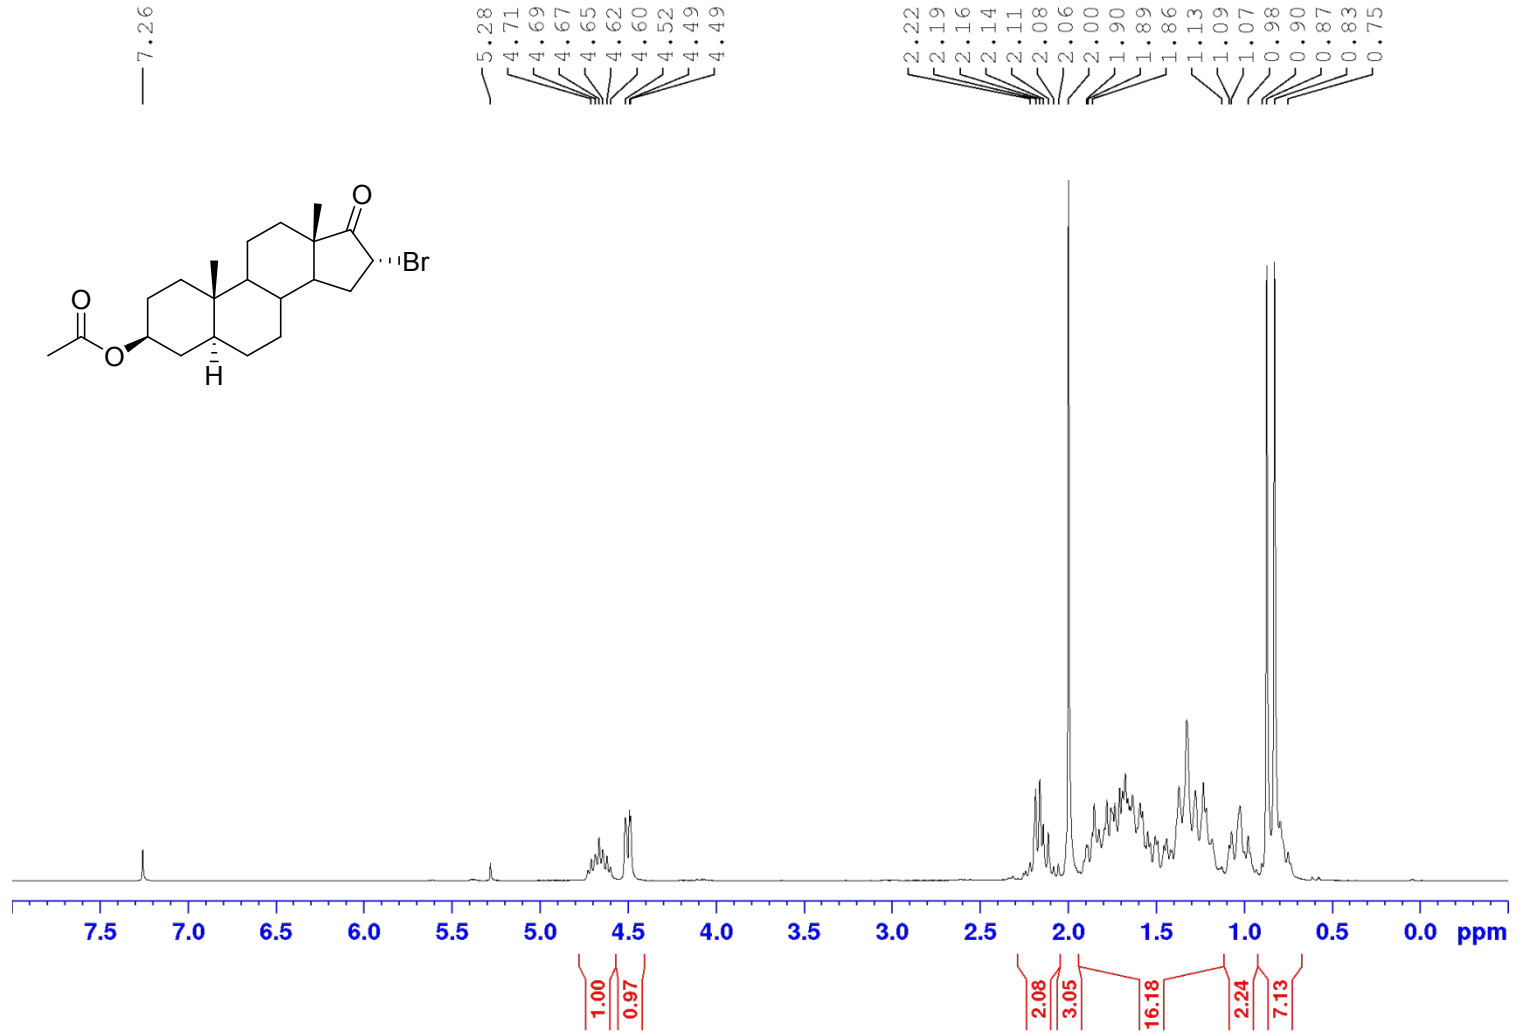

16 $\alpha$ -Bromoepiandrosterone acetate (12) –  $^{13}\text{C}$  –  $\text{CDCl}_3$  – 62.5 MHz

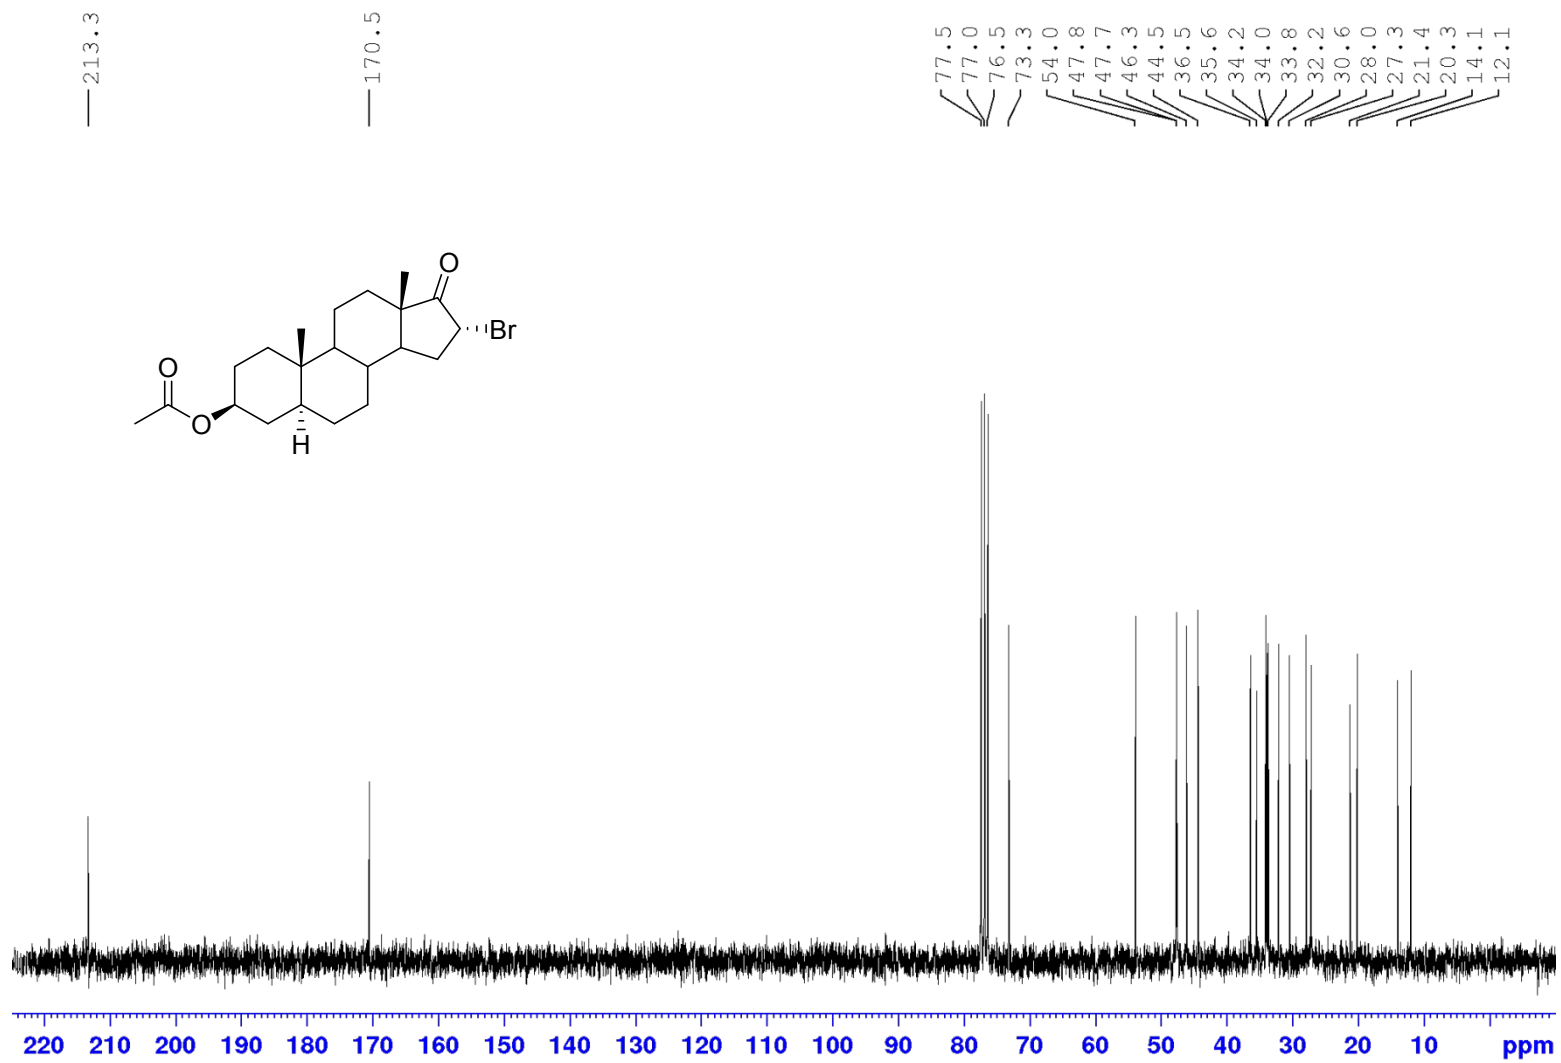

—213.3

—170.5

77.5  
77.0  
76.5  
73.3  
54.0  
47.8  
47.7  
46.3  
44.5  
36.5  
35.6  
34.2  
34.0  
33.8  
32.2  
30.6  
28.0  
27.3  
21.4  
20.3  
14.1  
12.1

16 $\alpha$ -Bromoepiandrosterone but-3-enoate (13) –  $^1\text{H}$  –  $\text{CDCl}_3$  – 250 MHz

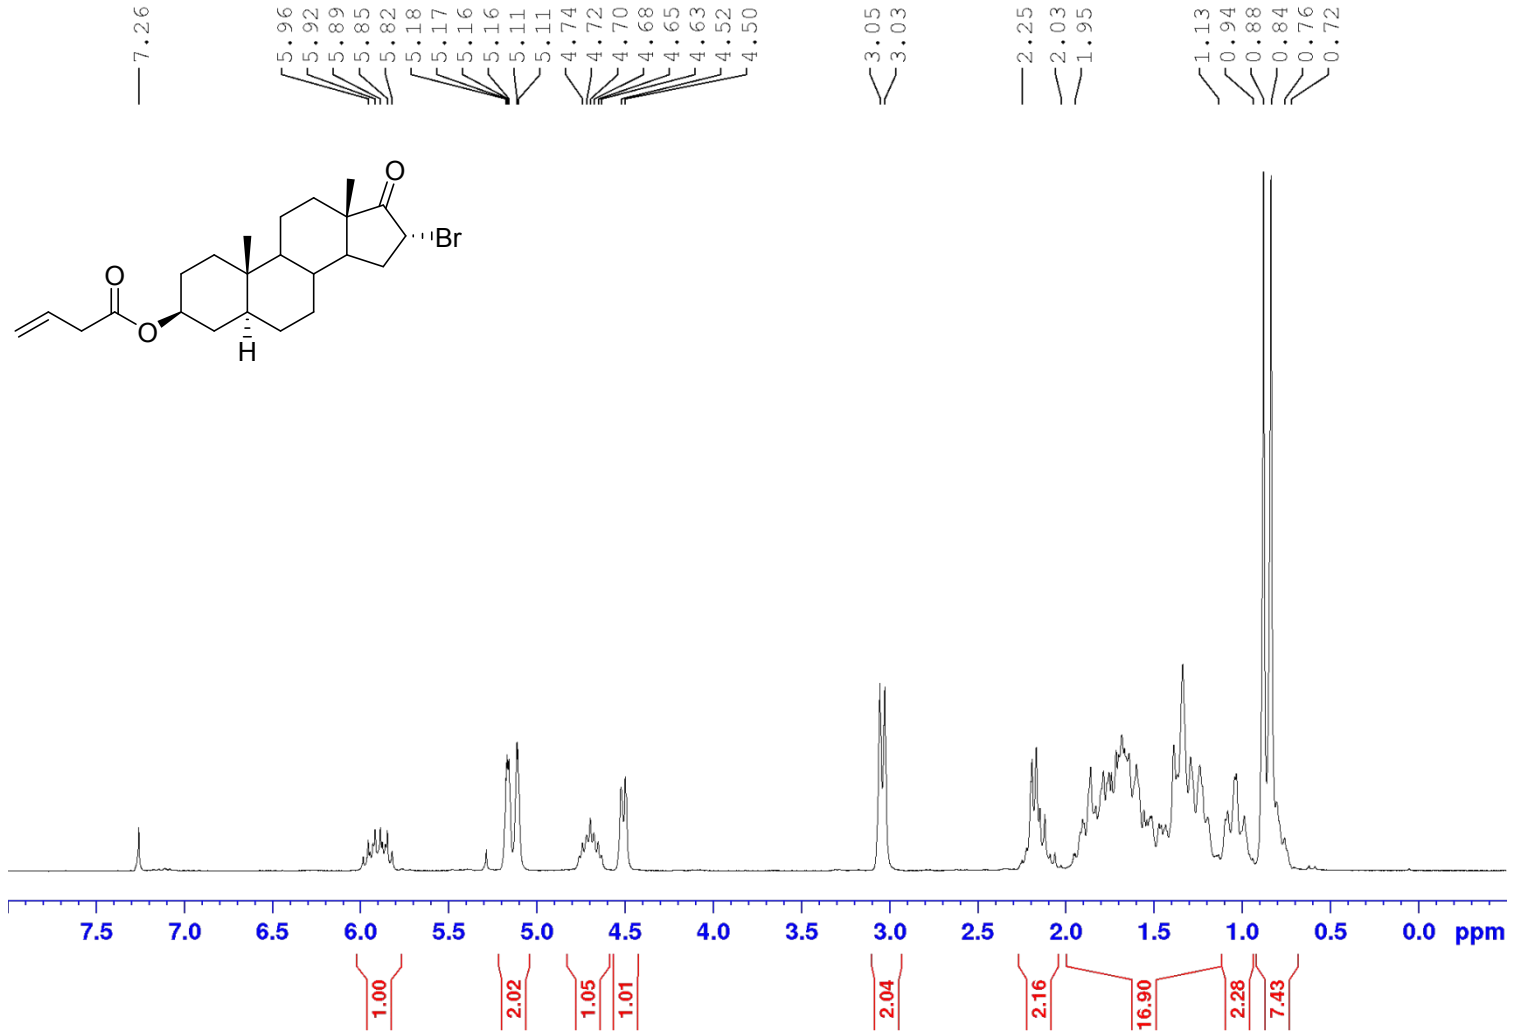



16 $\alpha$ -Bromoepiandrosterone but-3-enoate (13) –  $^{13}\text{C}$  –  $\text{CDCl}_3$  – 62.5 MHz

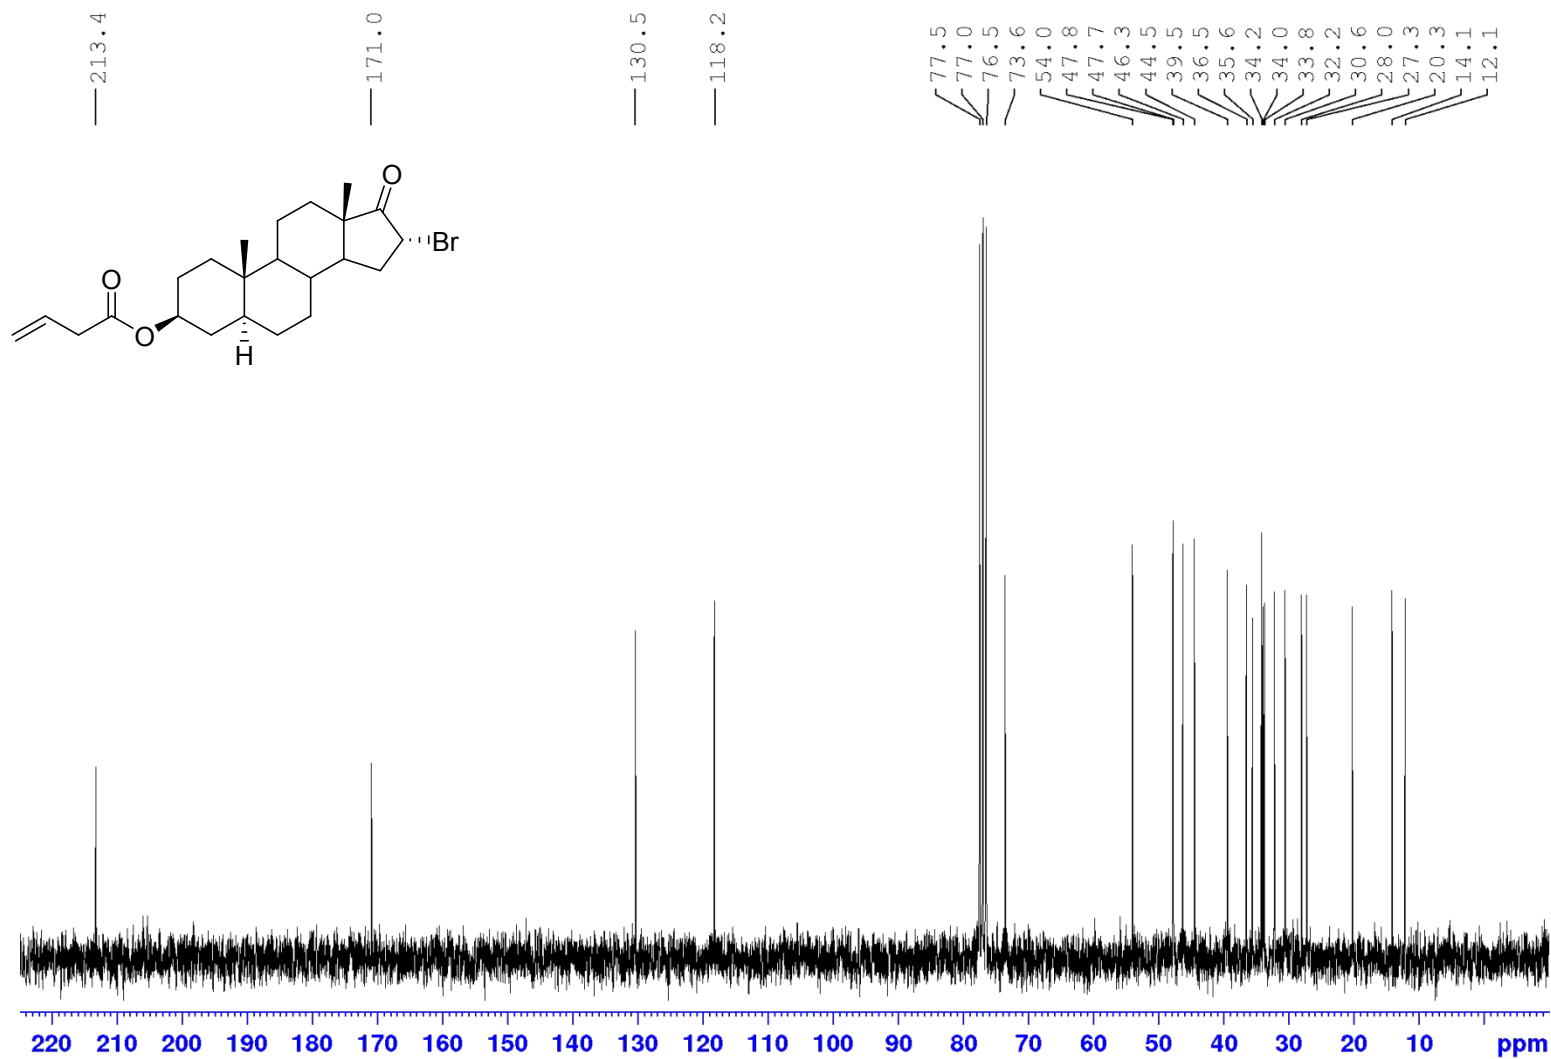

16 $\alpha$ -Bromoepiandrosterone isobutyrate (14) –  $^1\text{H}$  –  $\text{CDCl}_3$  – 500 MHz

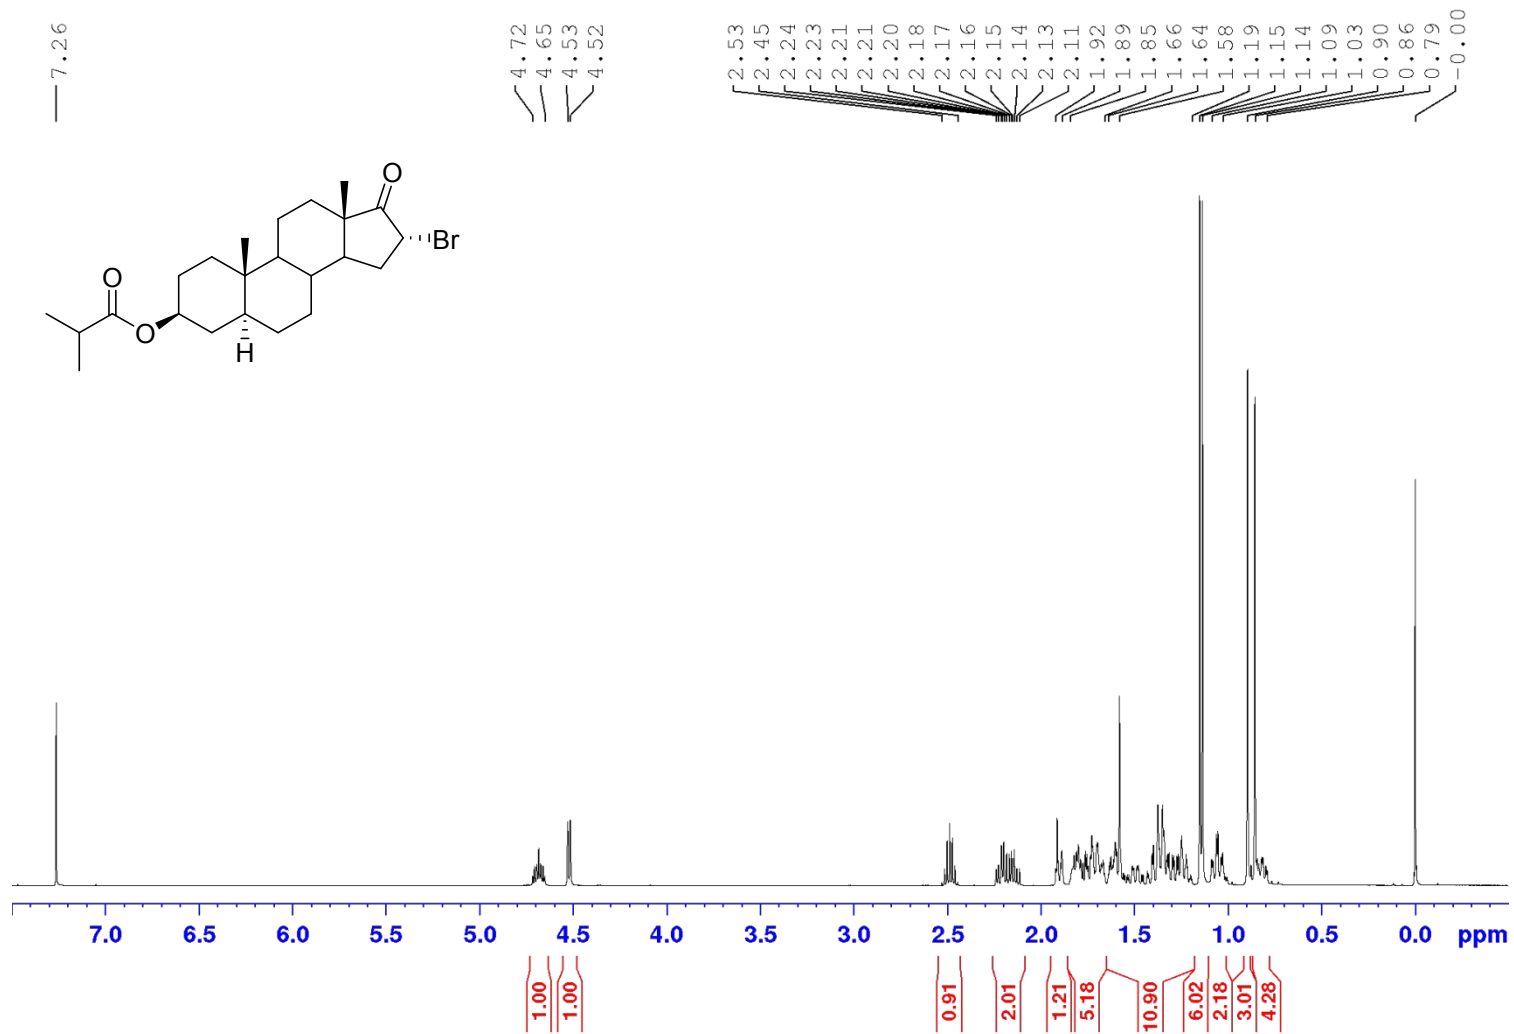

16 $\alpha$ -Bromoepiandrosterone isobutyrate (14) –  $^{13}\text{C}$  –  $\text{CDCl}_3$  – 125 MHz

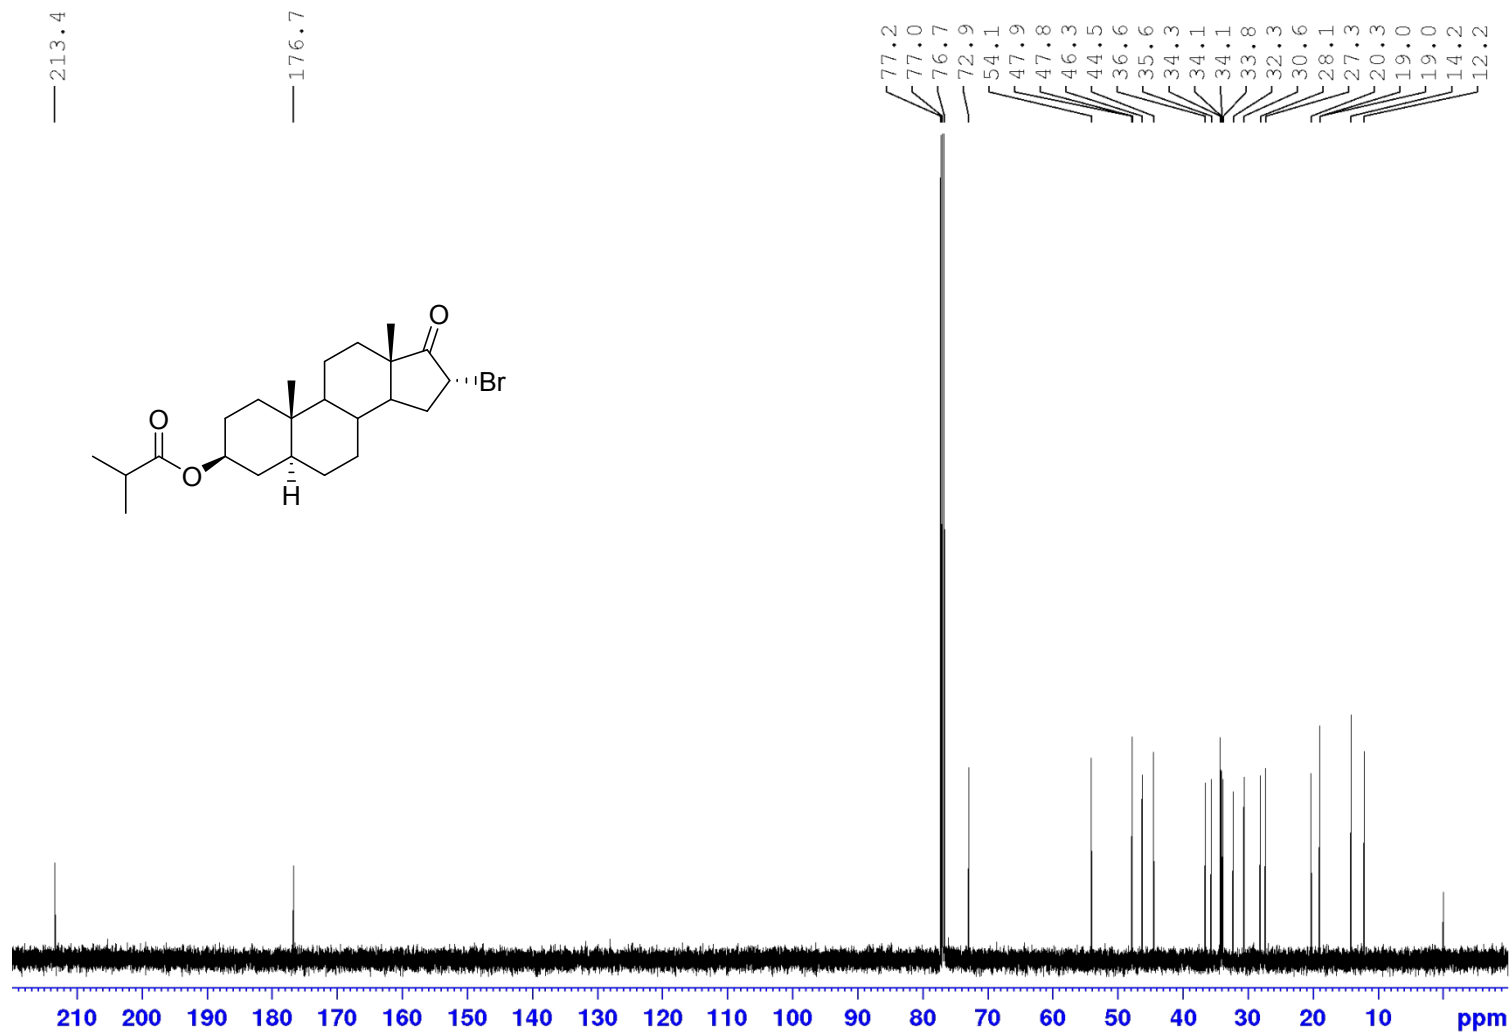

16 $\alpha$ -Bromoepiandrosterone methanesulfonate (15) –  $^1\text{H}$  –  $\text{CDCl}_3$  – 250 MHz

— 7.26

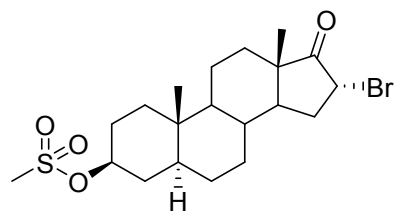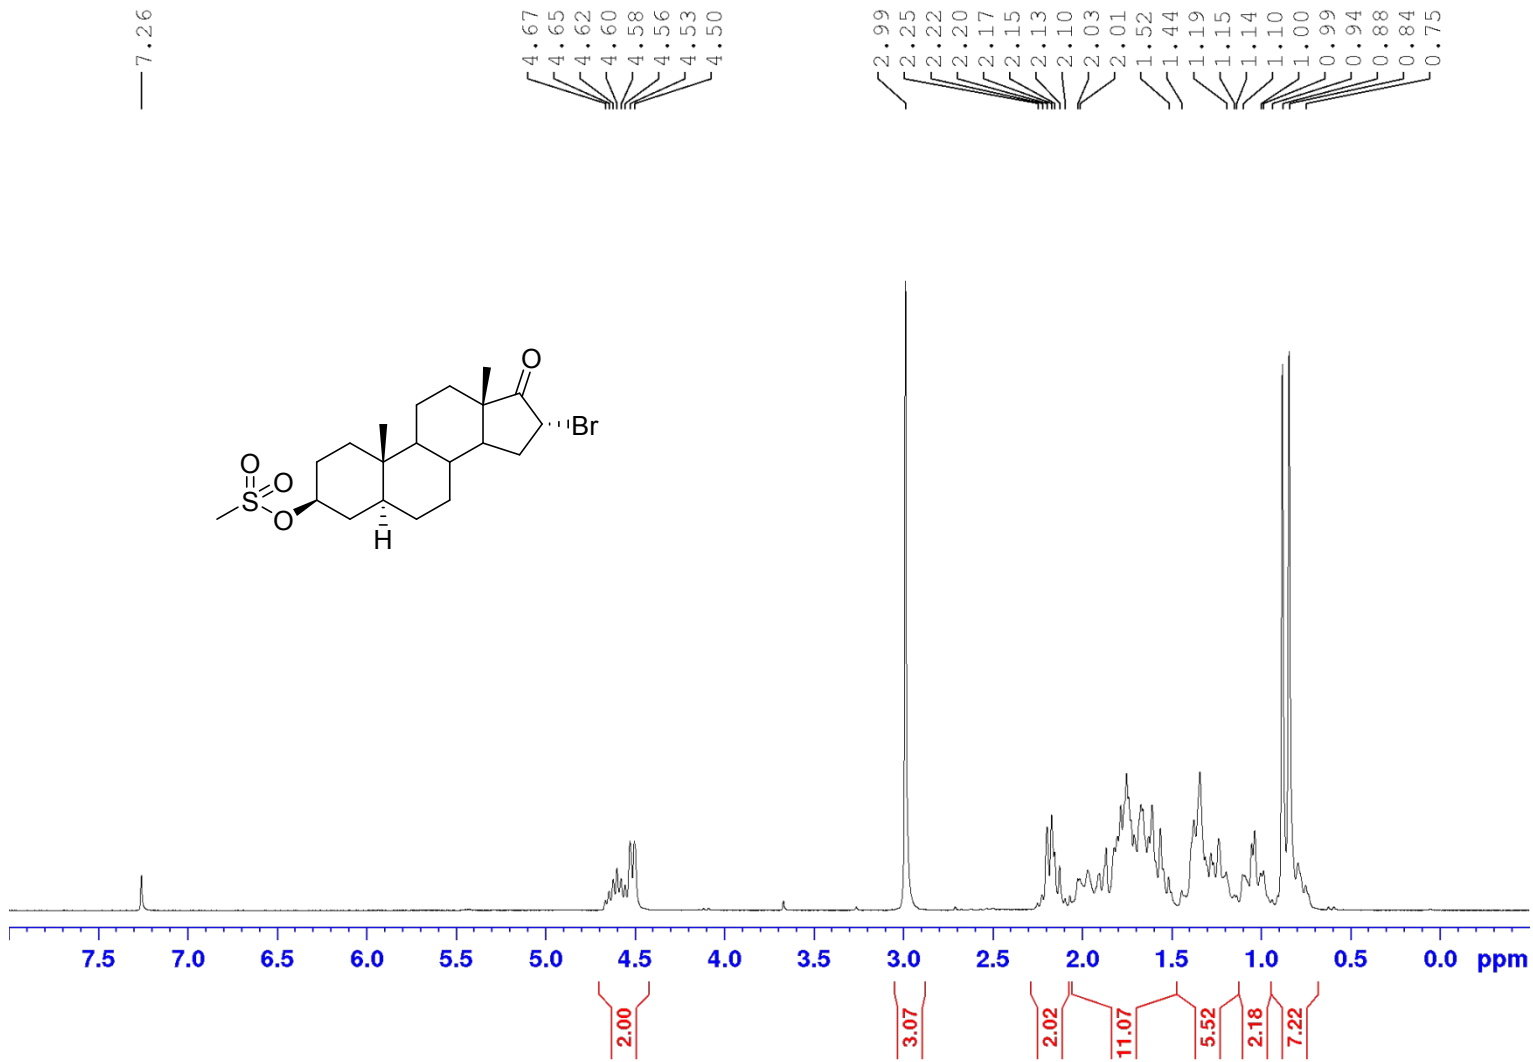

16 $\alpha$ -Bromoepiandrosterone methanesulfonate (15) –  $^{13}\text{C}$  –  $\text{CDCl}_3$  – 62.5 MHz

— 213.2

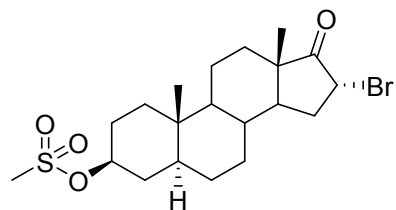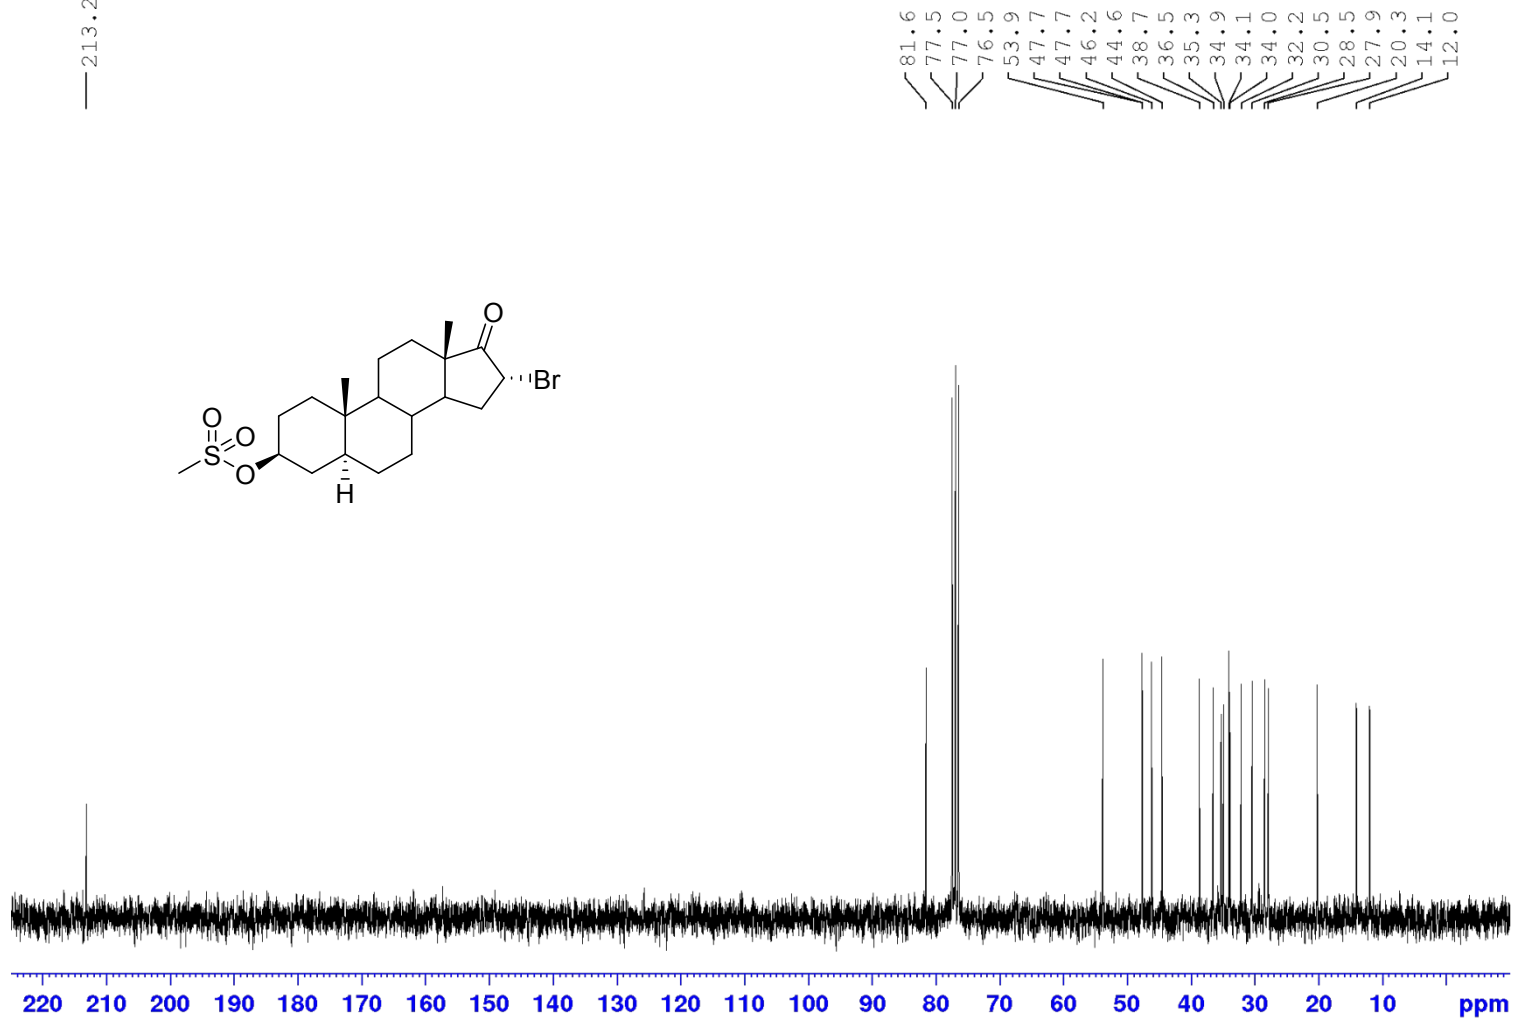

Epiandrosterone acrylate (16) –  $^1\text{H}$  –  $\text{CDCl}_3$  – 250 MHz

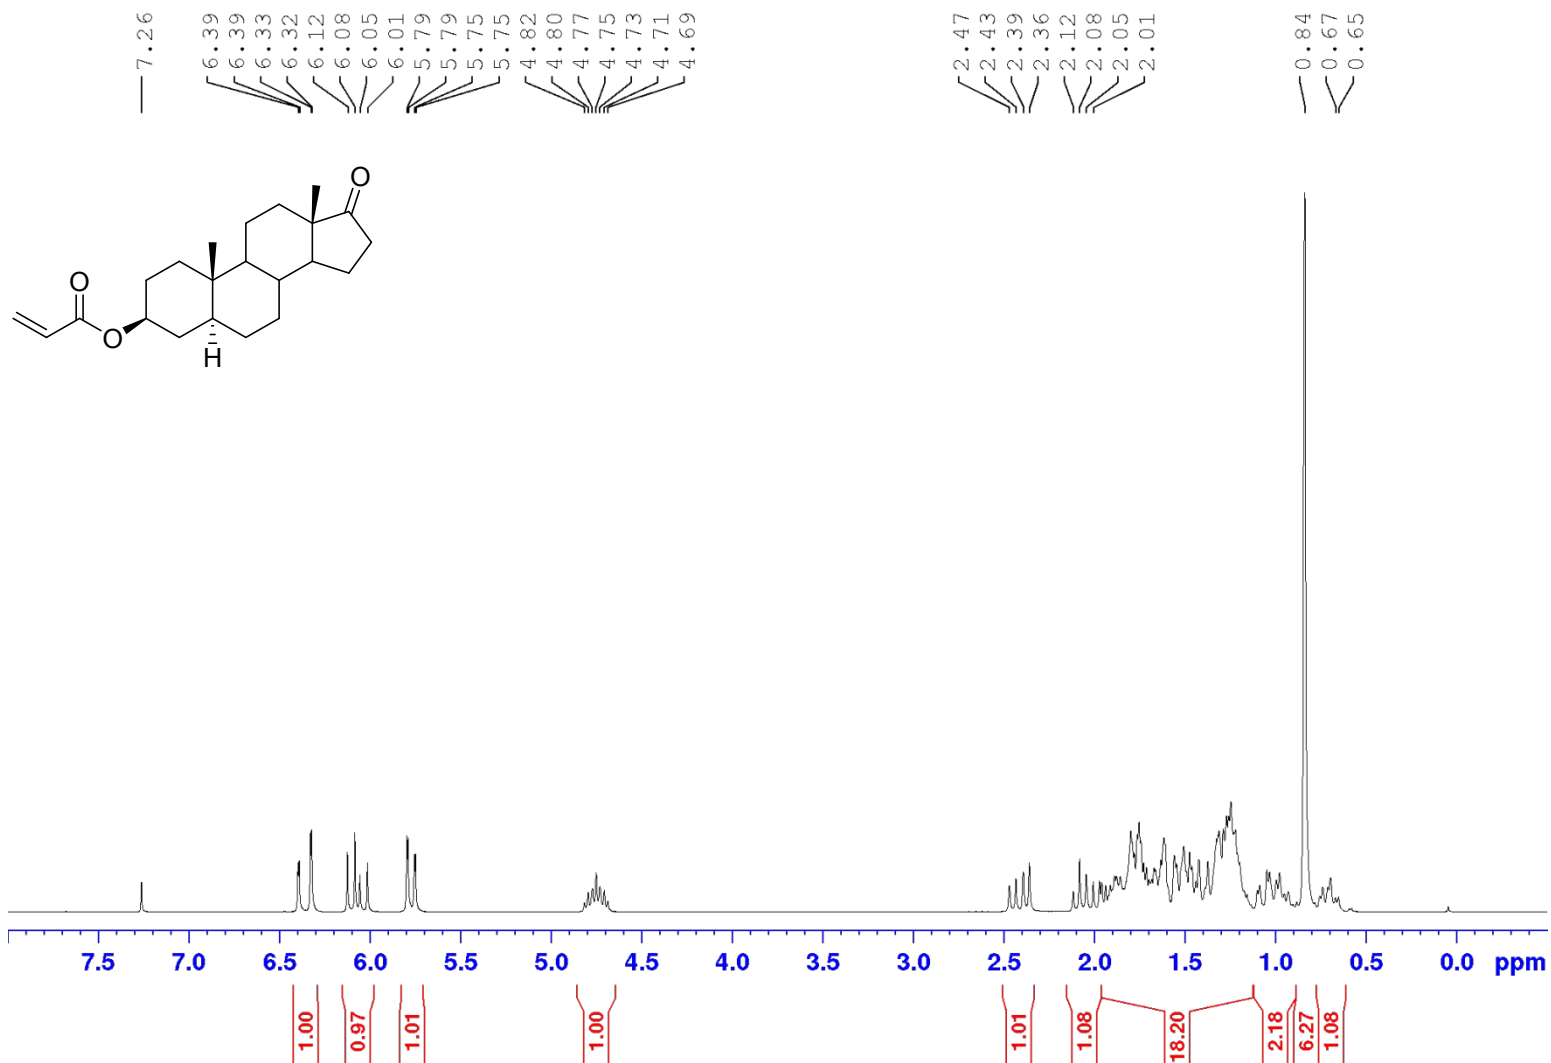

Epiandrosterone acrylate (16) –  $^{13}\text{C}$  –  $\text{CDCl}_3$  – 62.5 MHz

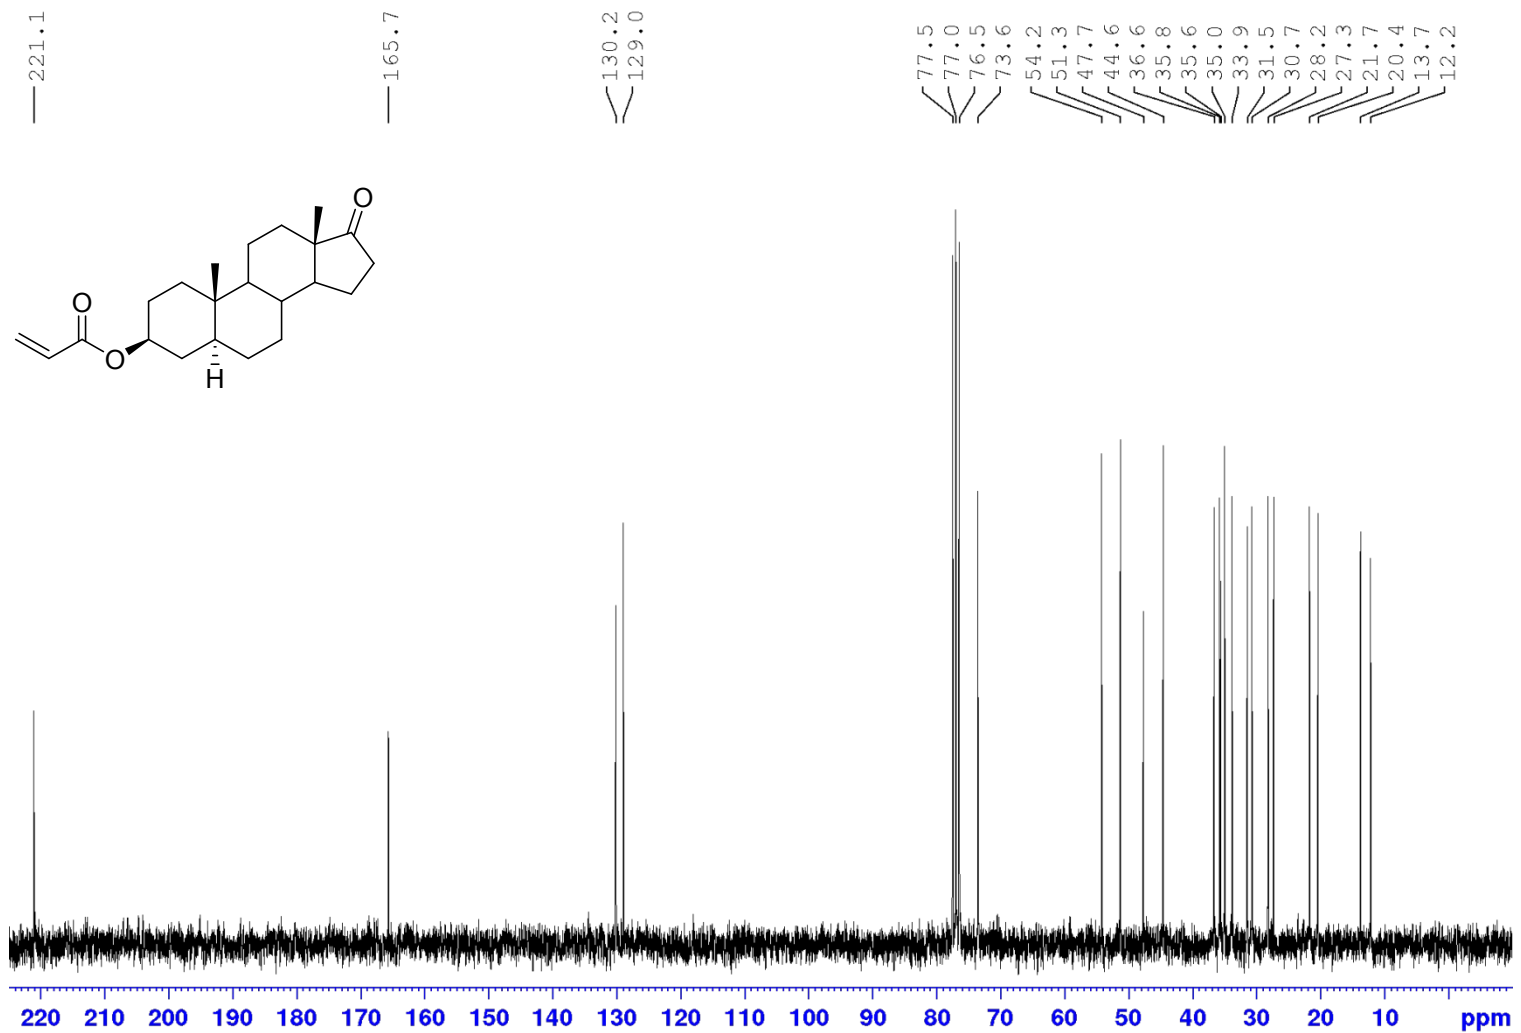

Epiandrosterone  $\alpha$ -bromoacetate (17) –  $^1\text{H}$  –  $\text{CDCl}_3$  – 250 MHz

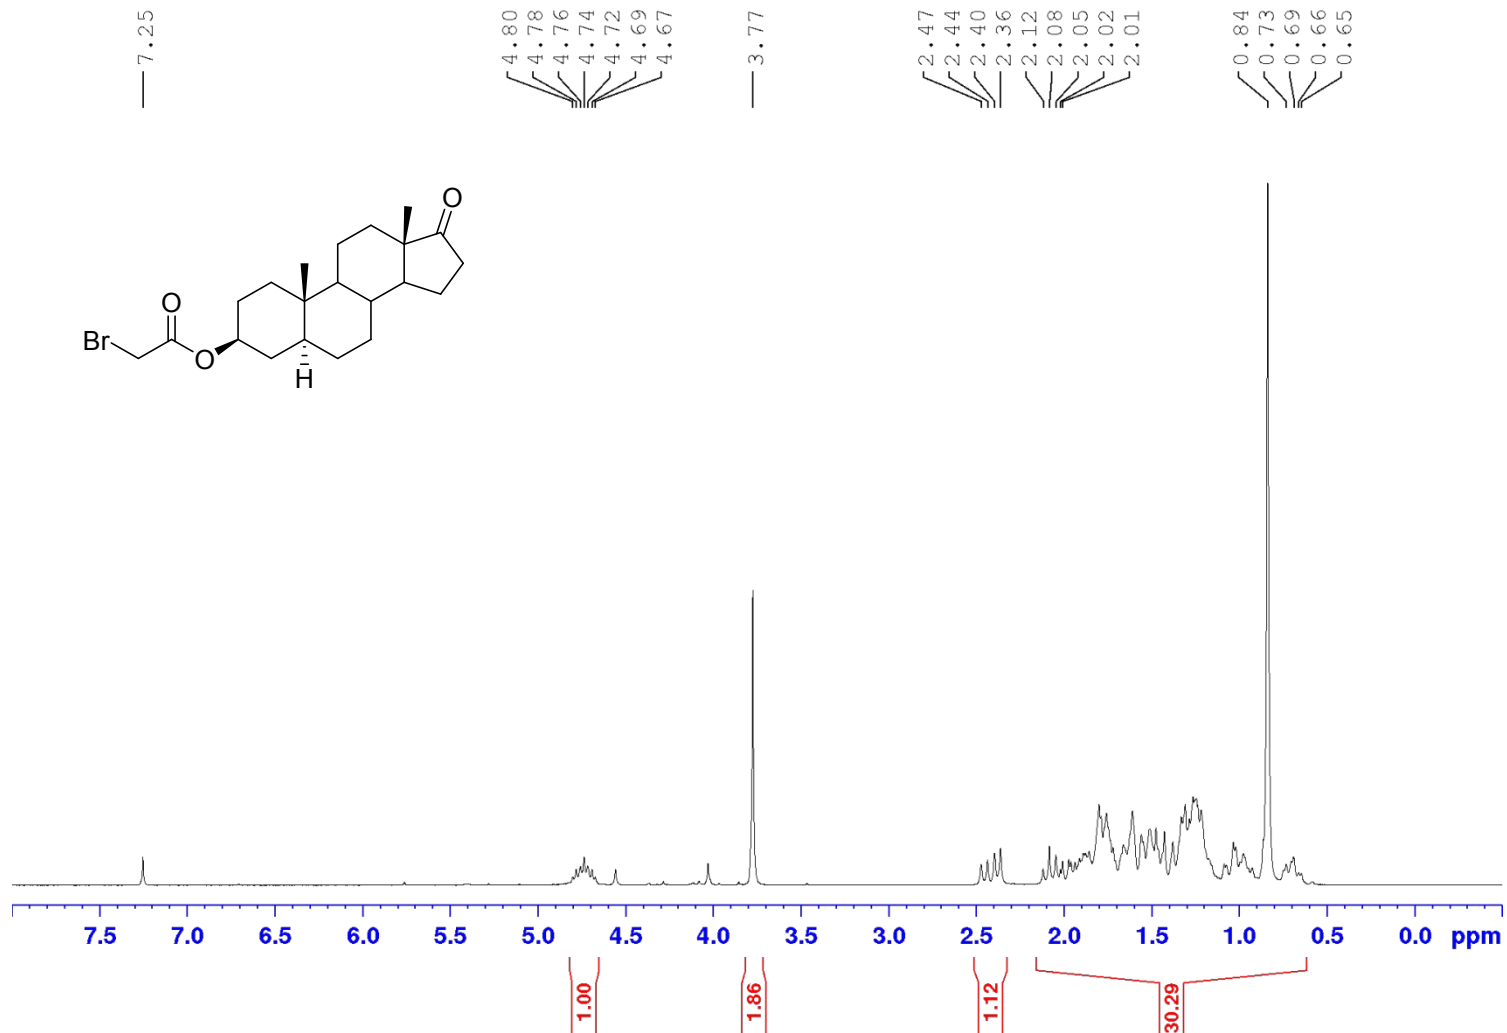



Epiandrosterone  $\alpha$ -bromoacetate (17) –  $^{13}\text{C}$  –  $\text{CDCl}_3$  – 62.5 MHz

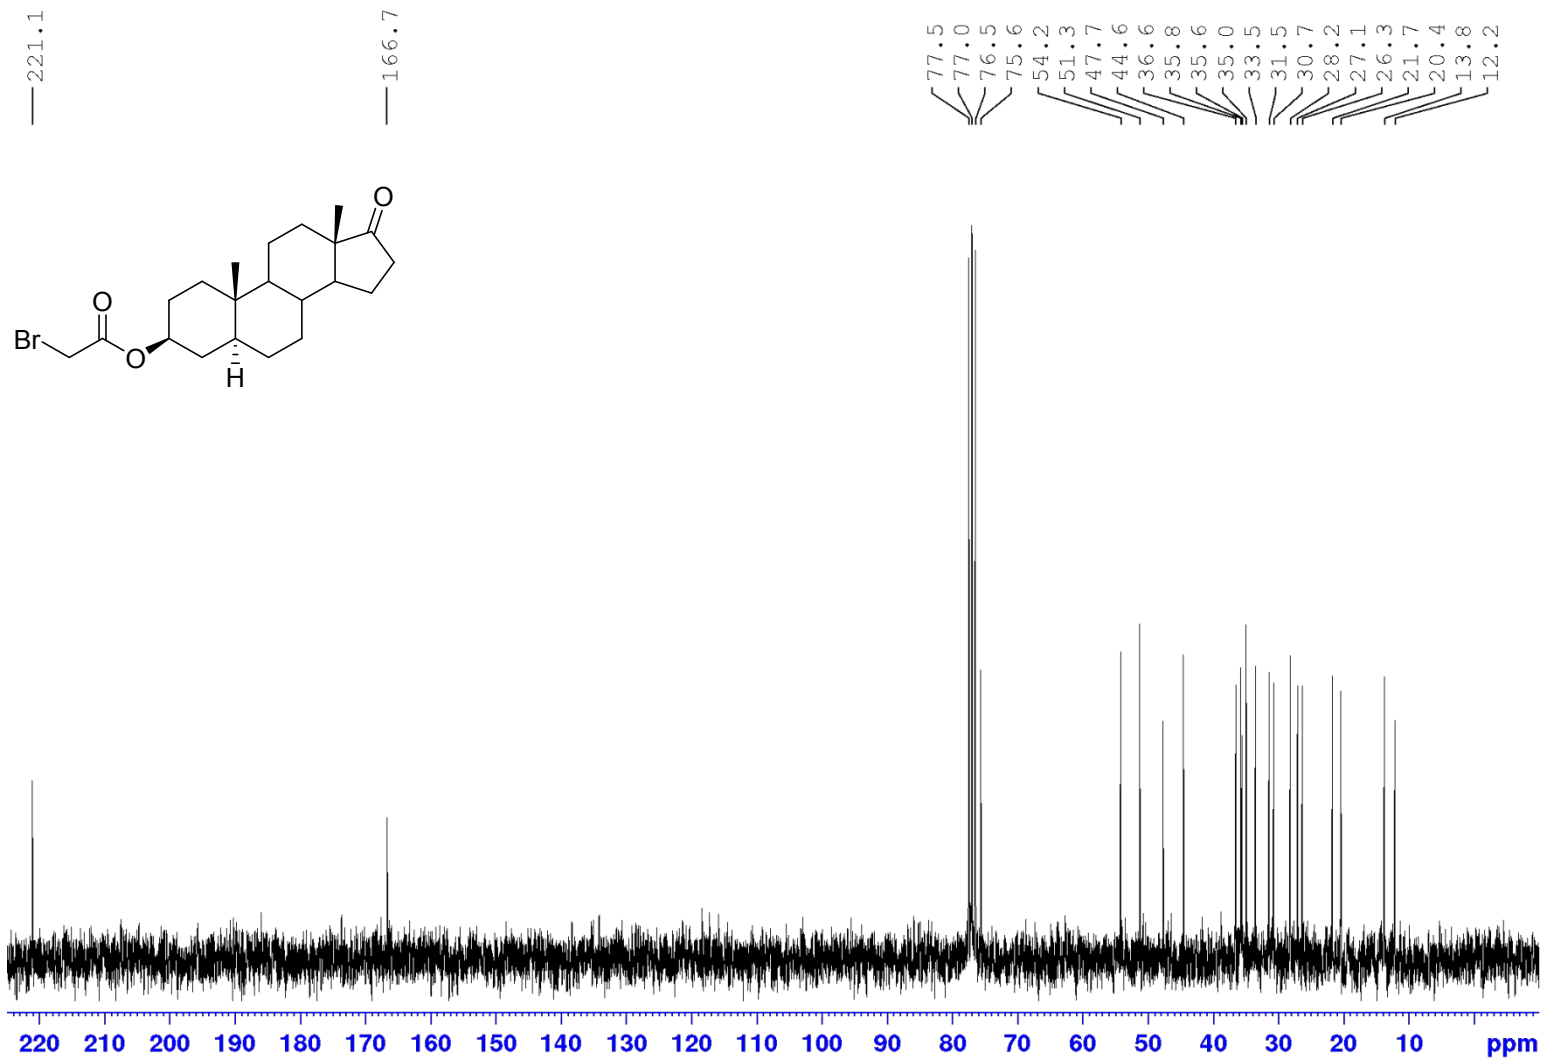

Epiandrosterone vinylsulfonate (18) –  $^1\text{H}$  –  $\text{CDCl}_3$  – 250 MHz

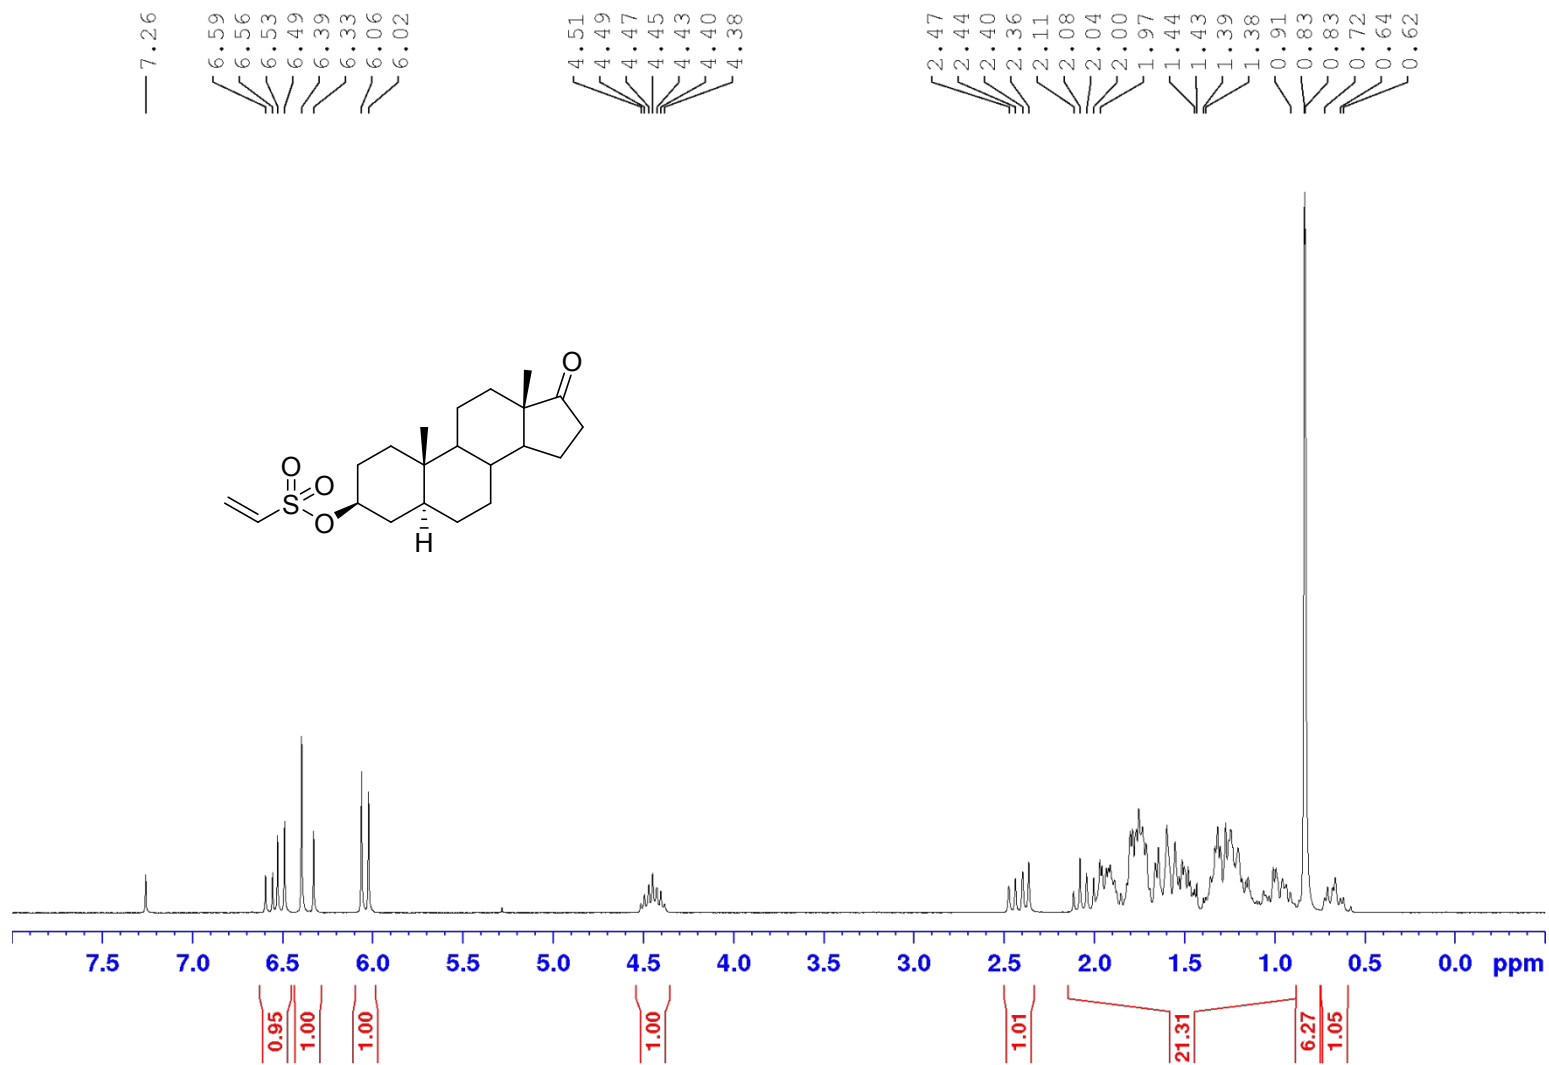

Epiandrosterone vinylsulfonate (18) –  $^{13}\text{C}$  –  $\text{CDCl}_3$  – 62.5 MHz

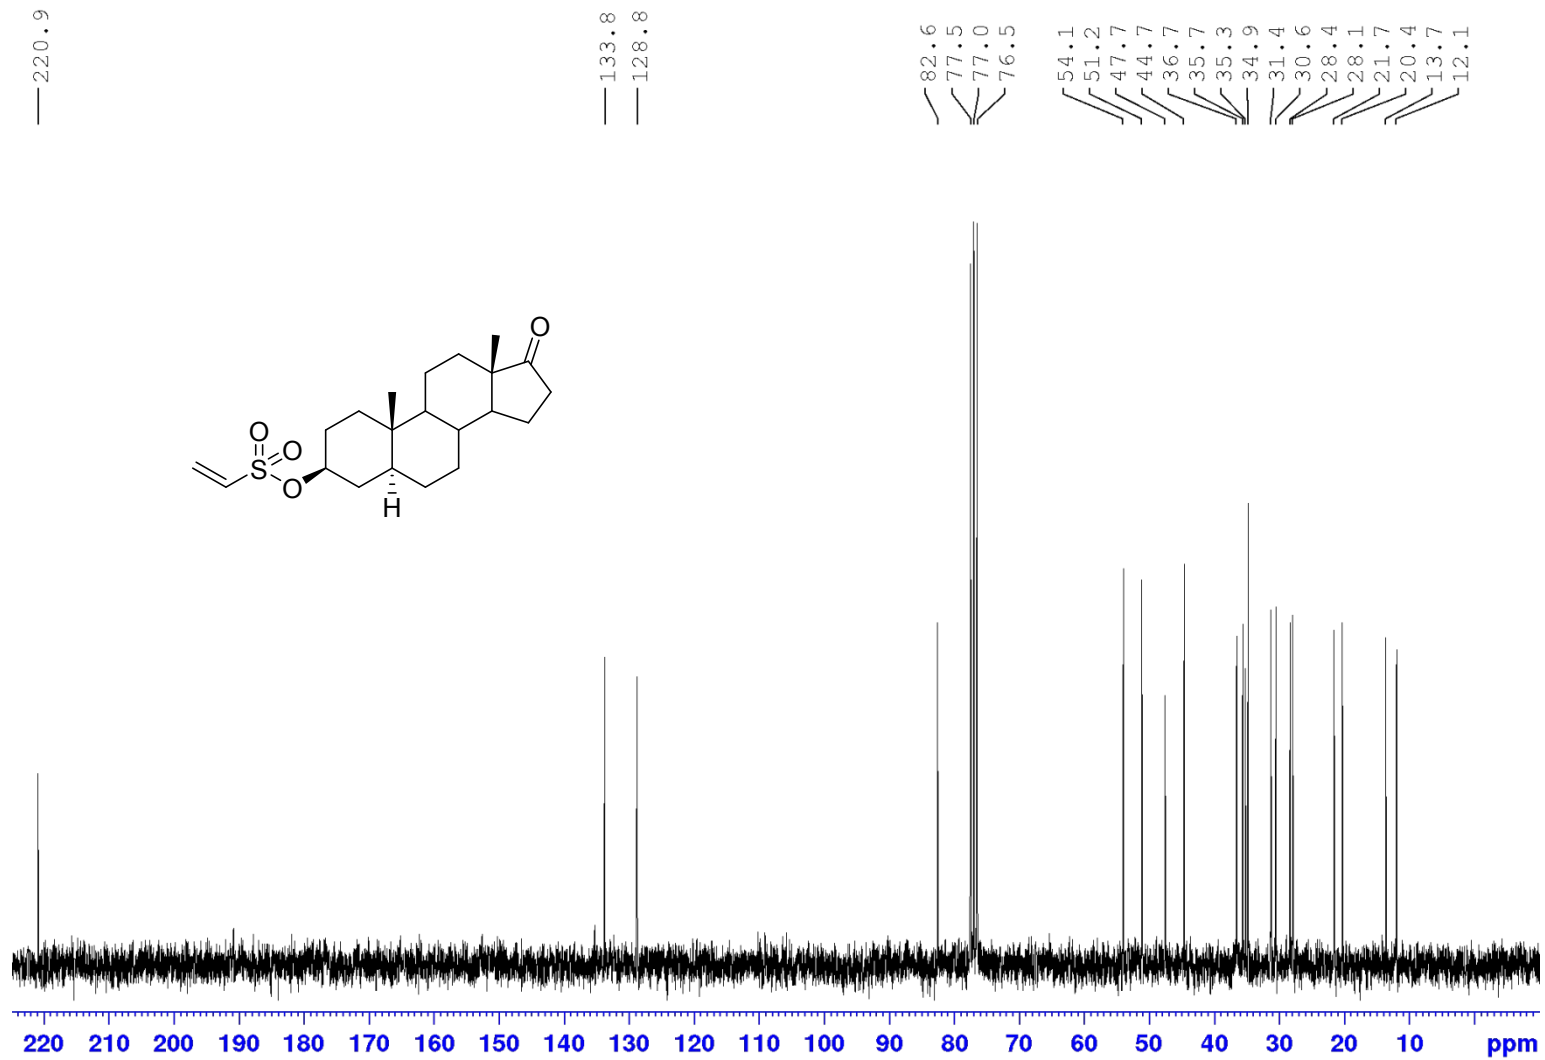

Epiandrosterone 3-(4-methylpiperazin-1-yl)propanoate (19) –  $^1\text{H}$  –  $\text{CDCl}_3$  – 500 MHz

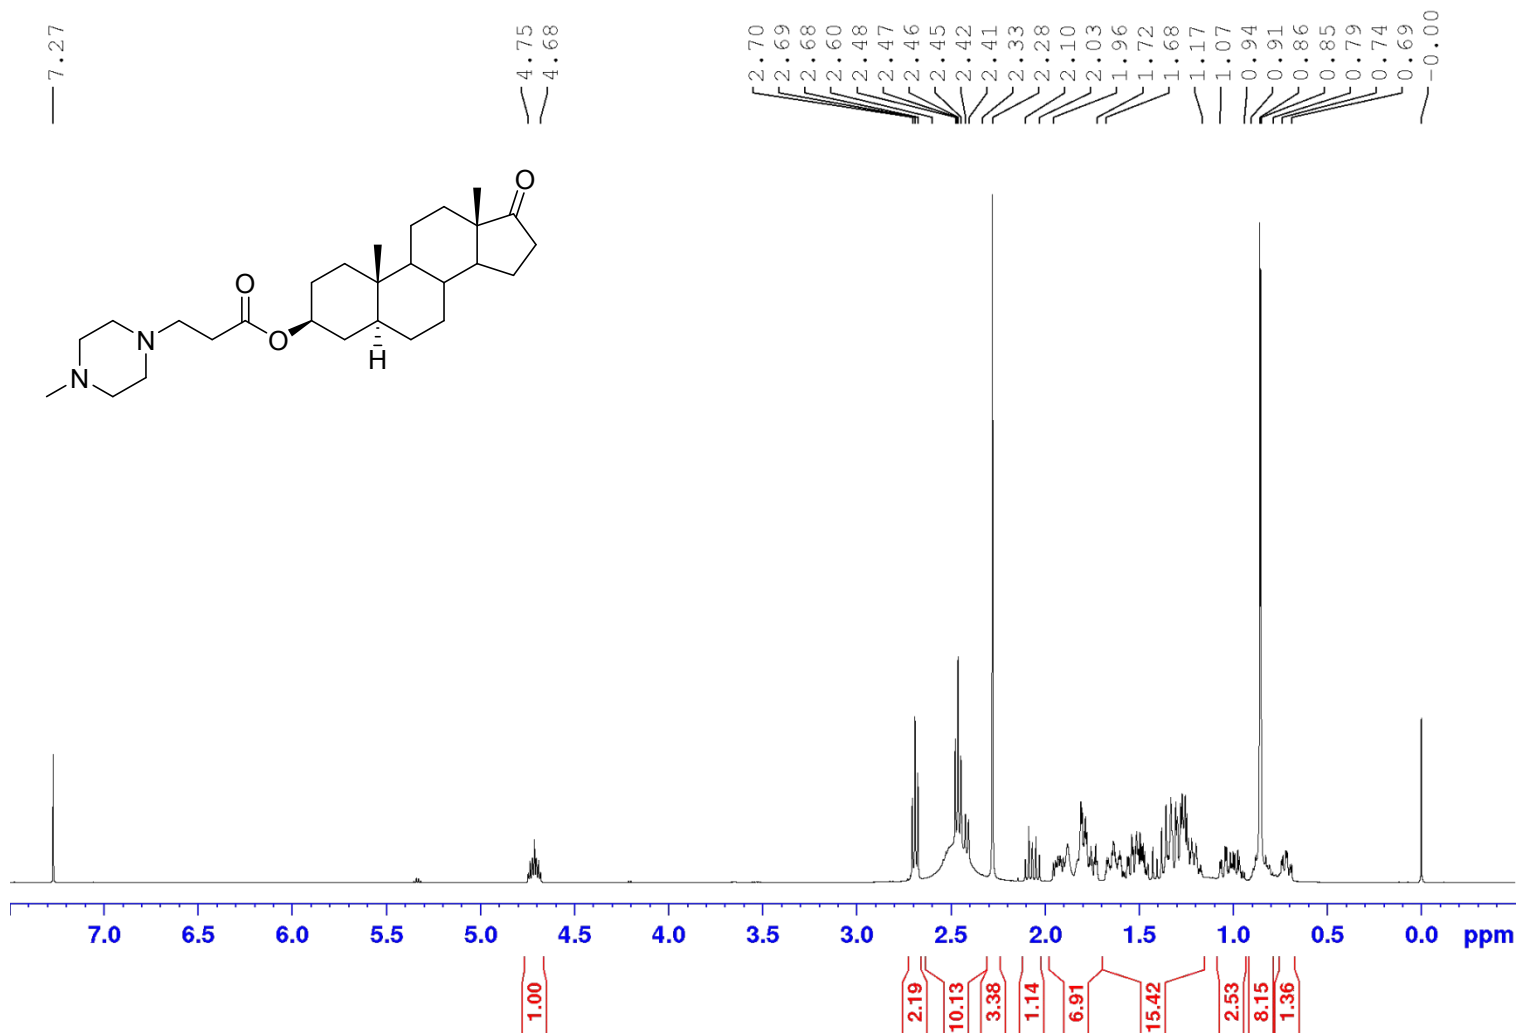

Epiandrosterone 3-(4-methylpiperazin-1-yl)propanoate (19) –  $^{13}\text{C}$  –  $\text{CDCl}_3$  – 125 MHz

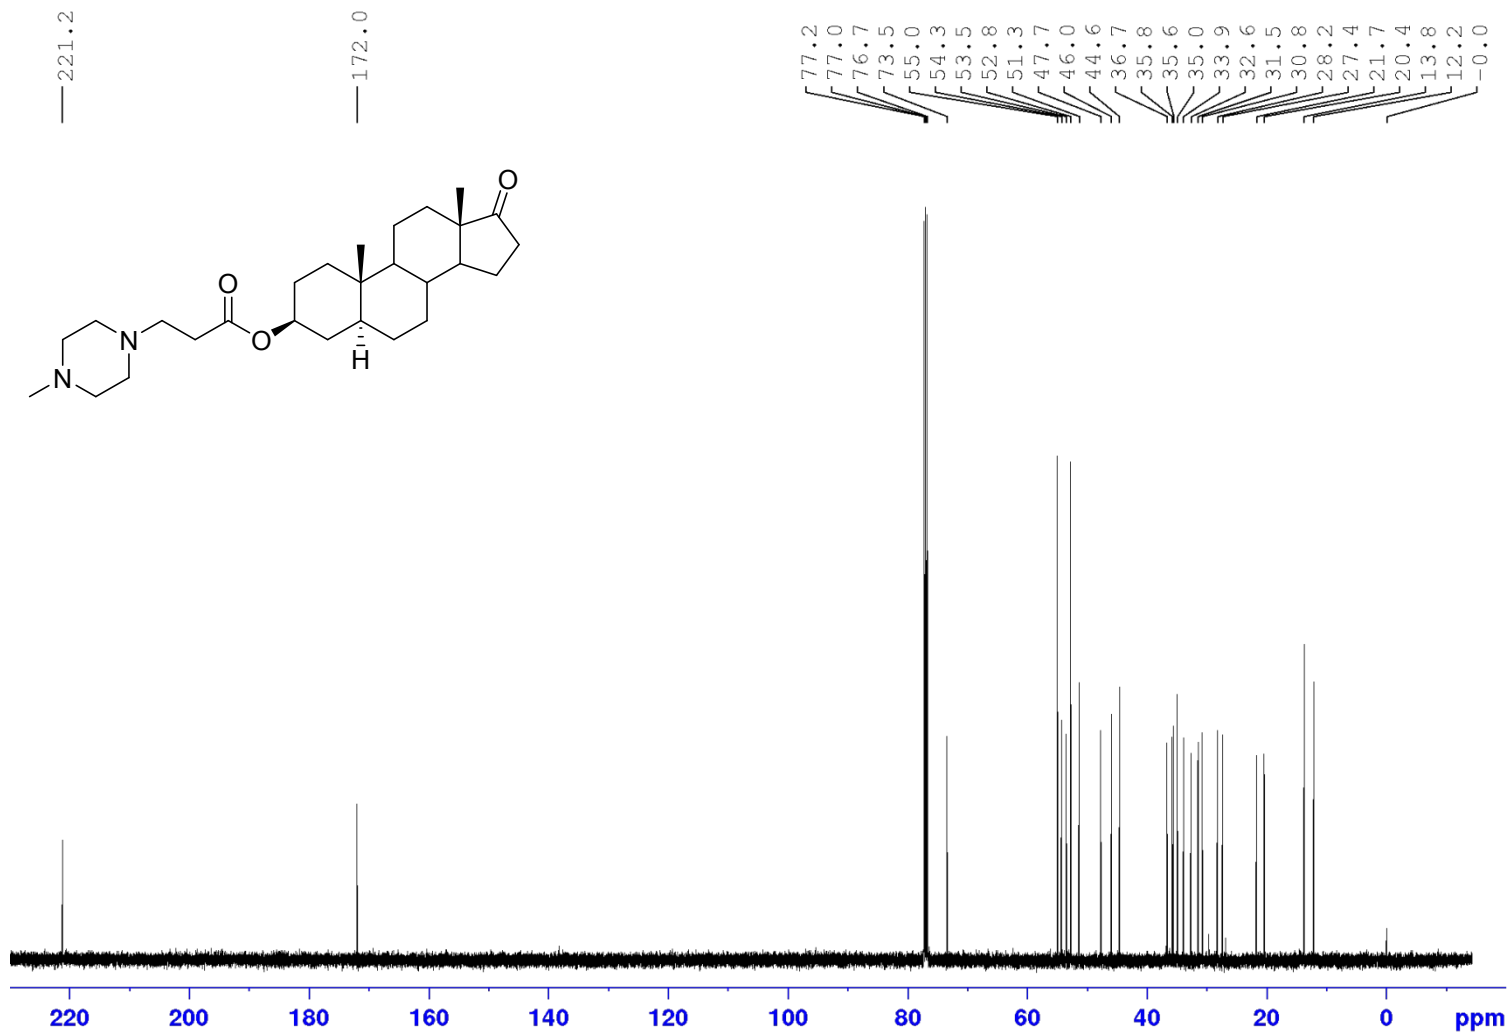

Epiandrosterone 3-morpholinopropanoate (20) –  $^1\text{H}$  –  $\text{CDCl}_3$  – 500 MHz

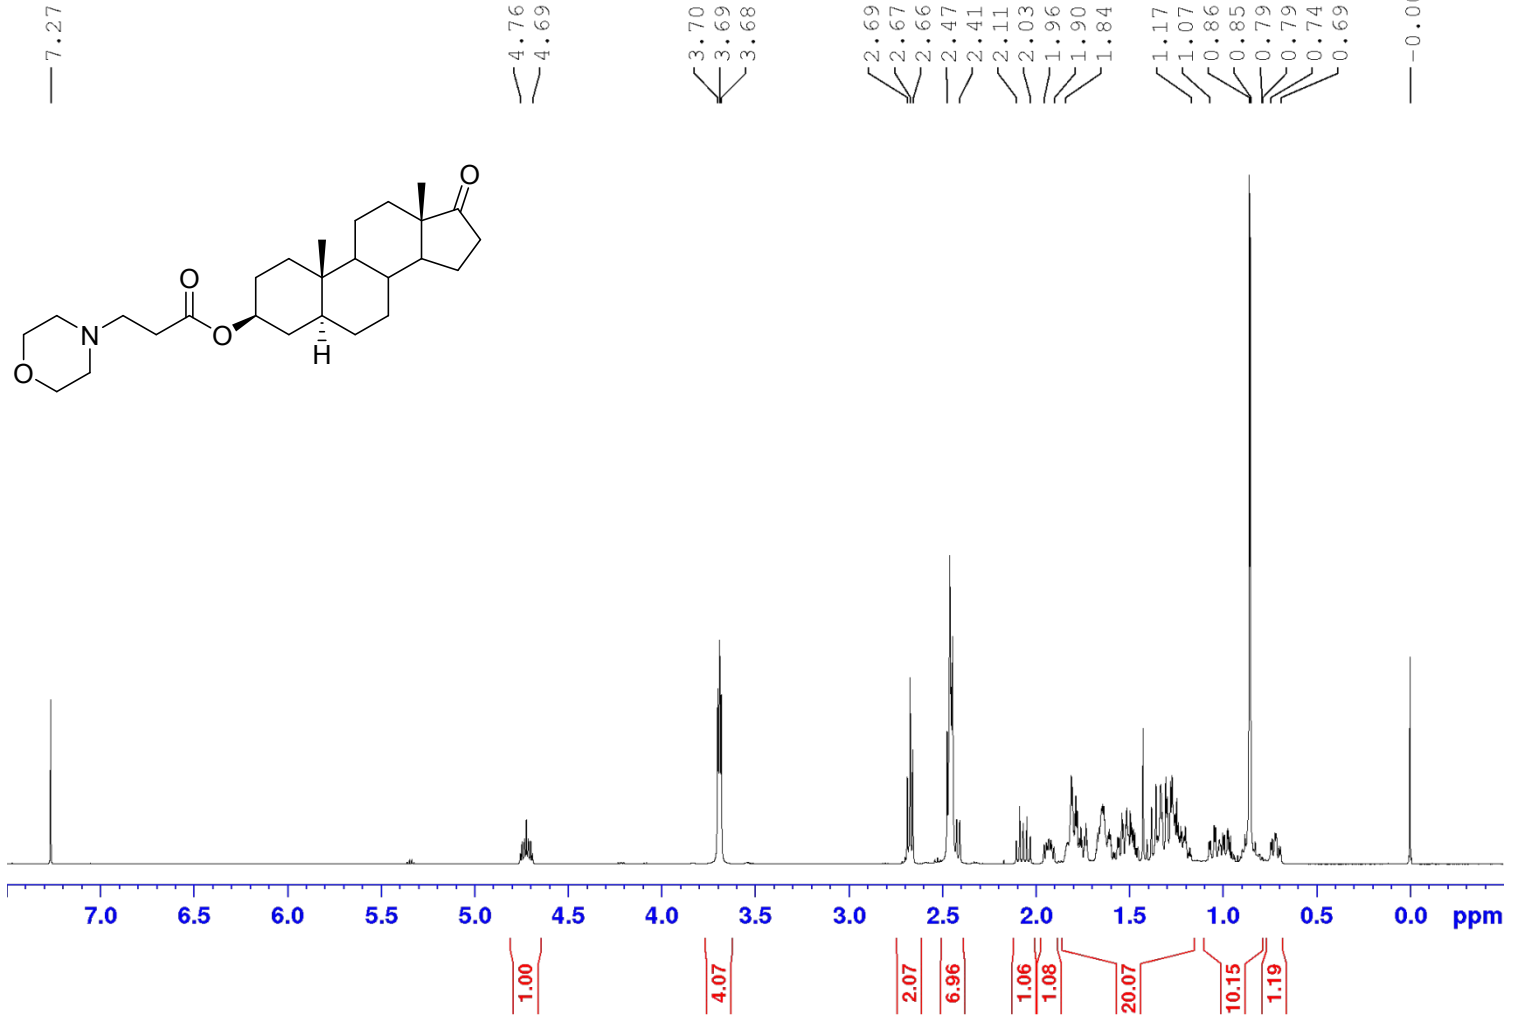

Epiandrosterone 3-morpholinopropanoate (20) –  $^{13}\text{C}$  –  $\text{CDCl}_3$  – 125 MHz

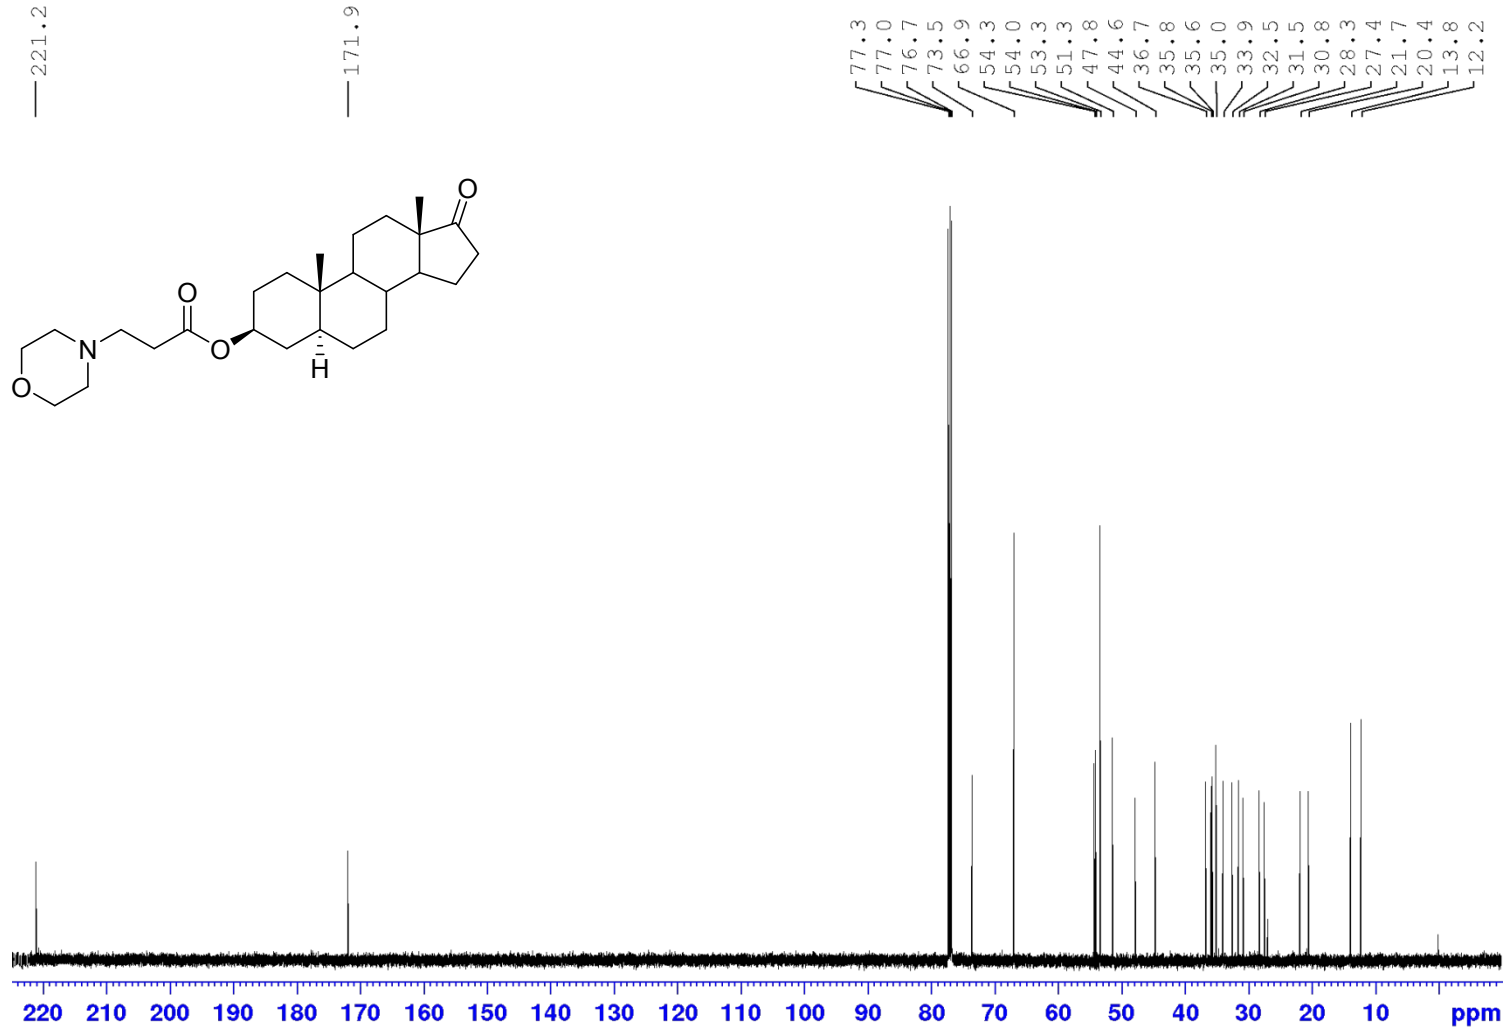

Epiandrosterone 2-(4-methylpiperazin-1-yl)acetate (21) –  $^1\text{H}$  –  $\text{CDCl}_3$  – 500 MHz

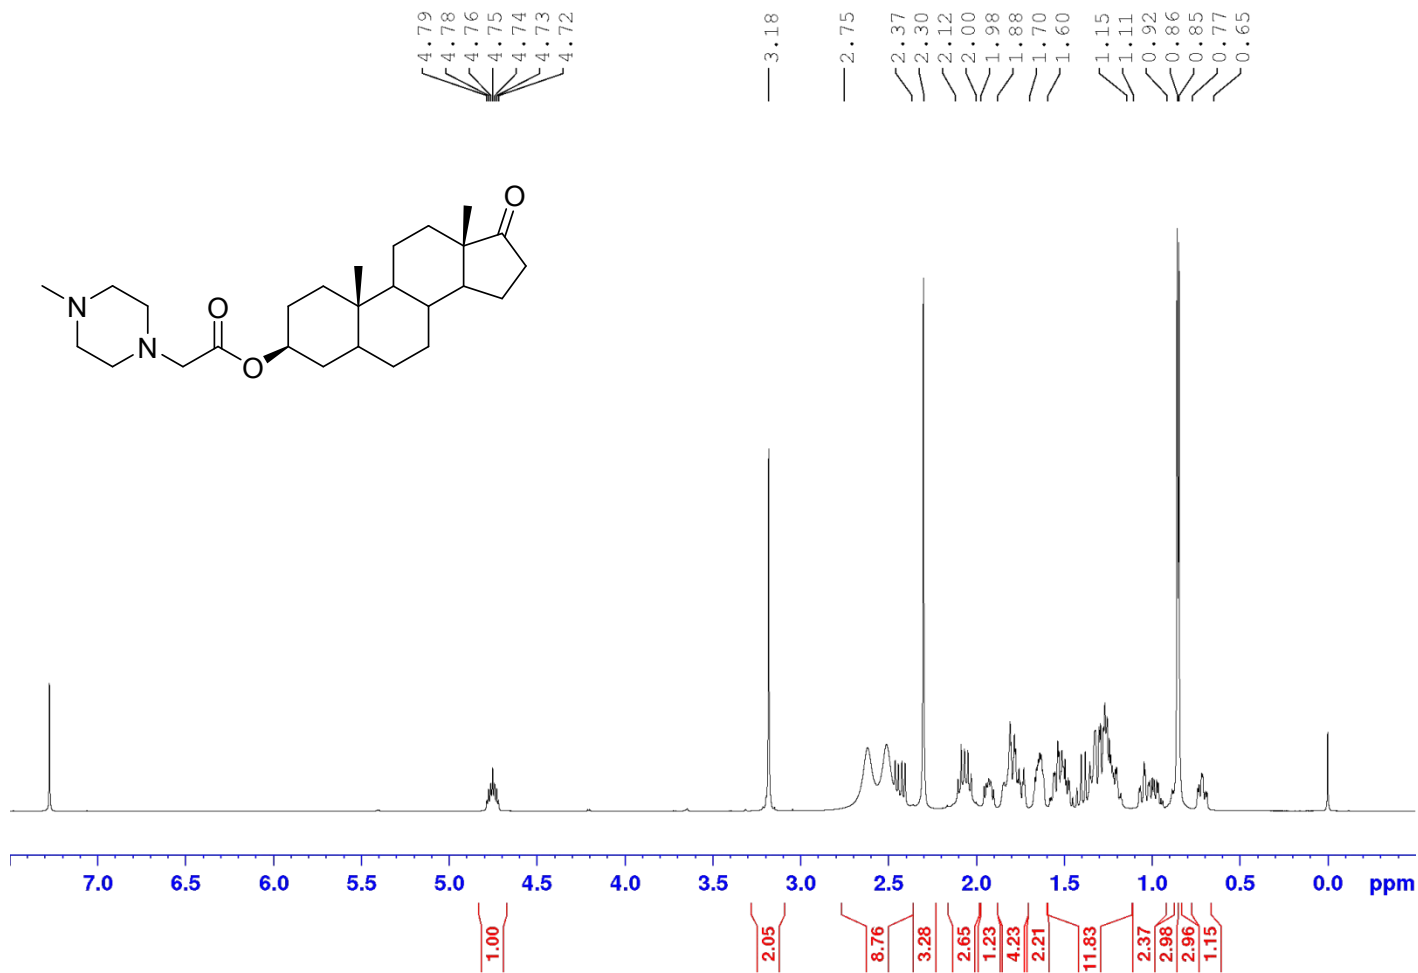



Epiandrosterone 2-(4-methylpiperazin-1-yl)acetate (21) –  $^{13}\text{C}$  –  $\text{CDCl}_3$  – 125 MHz

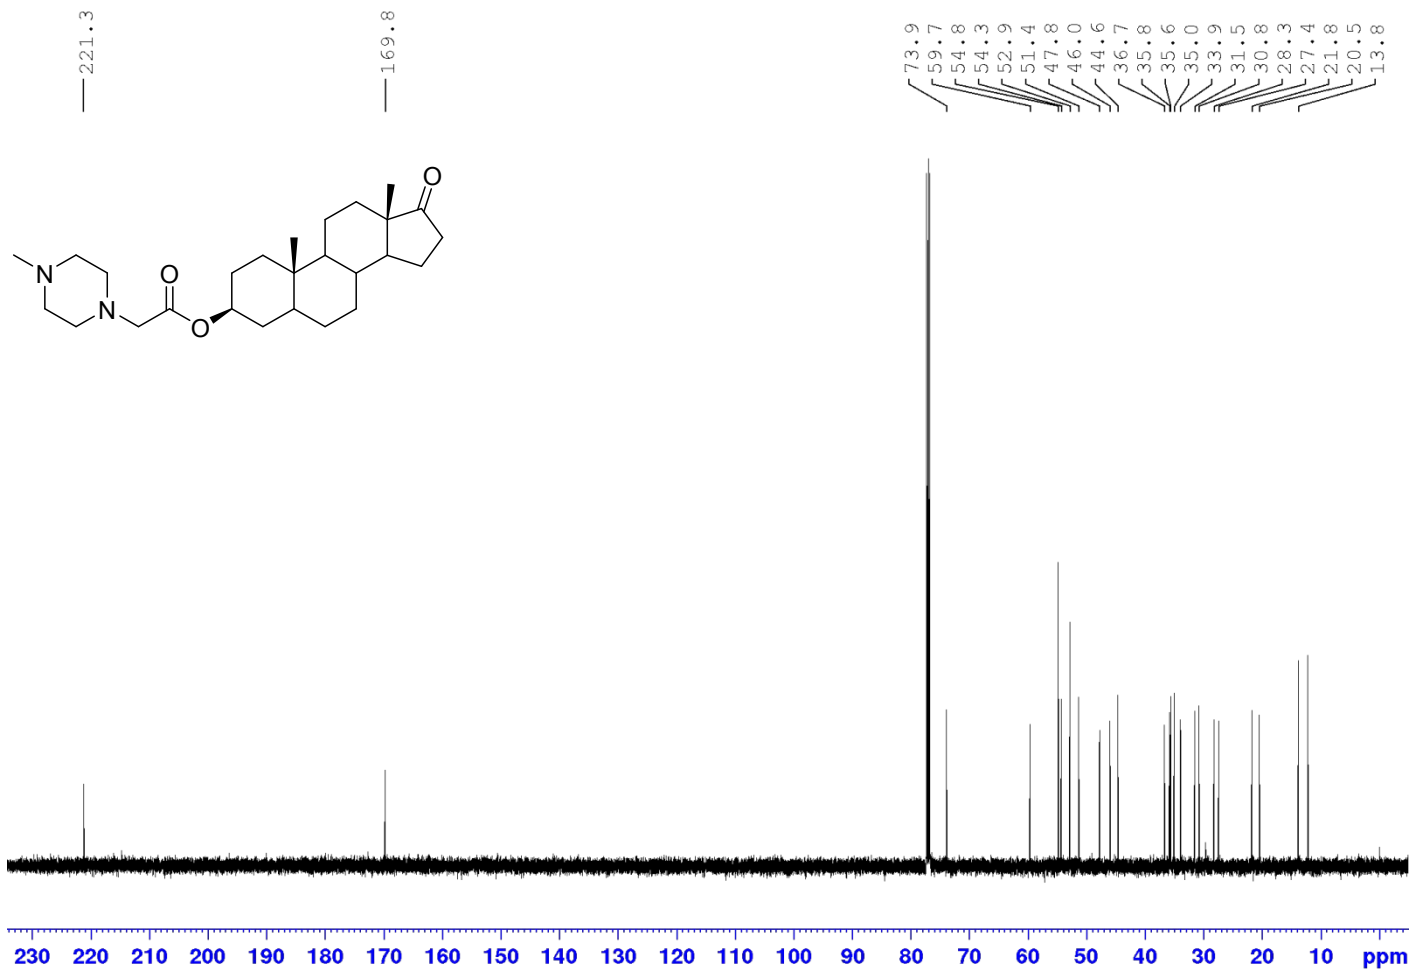

Epiandrosterone 2-morpholinoacetate (22) –  $^1\text{H}$  –  $\text{CDCl}_3$  – 500 MHz

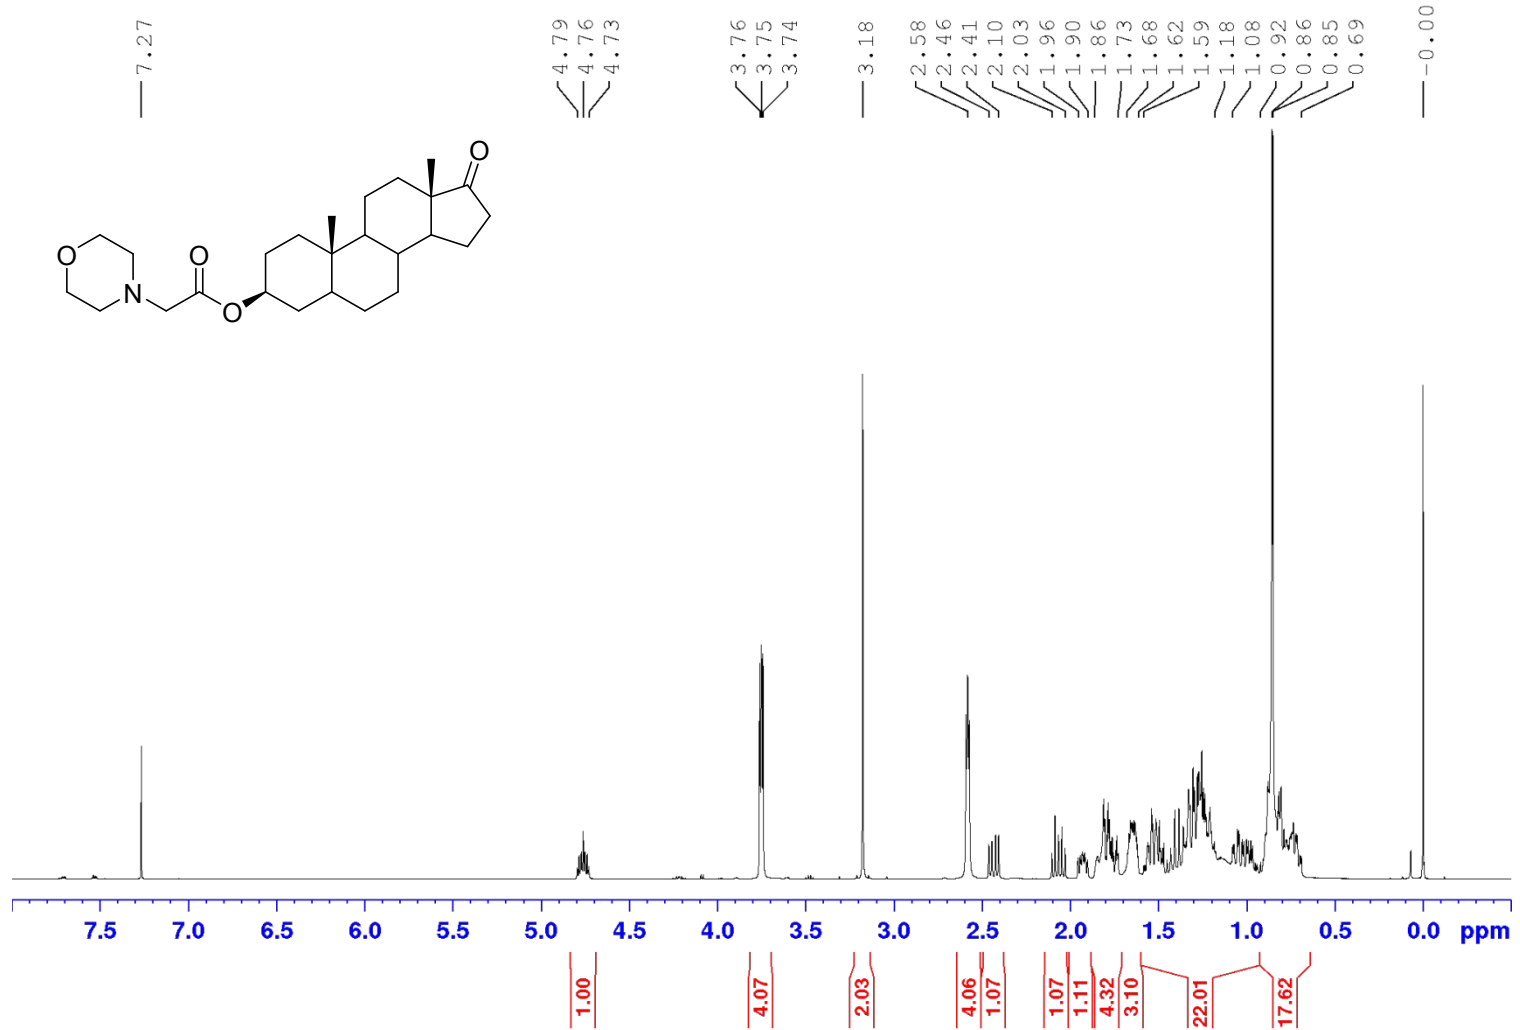

Epiandrosterone 2-morpholinoacetate (22) –  $^{13}\text{C}$  –  $\text{CDCl}_3$  – 125 MHz

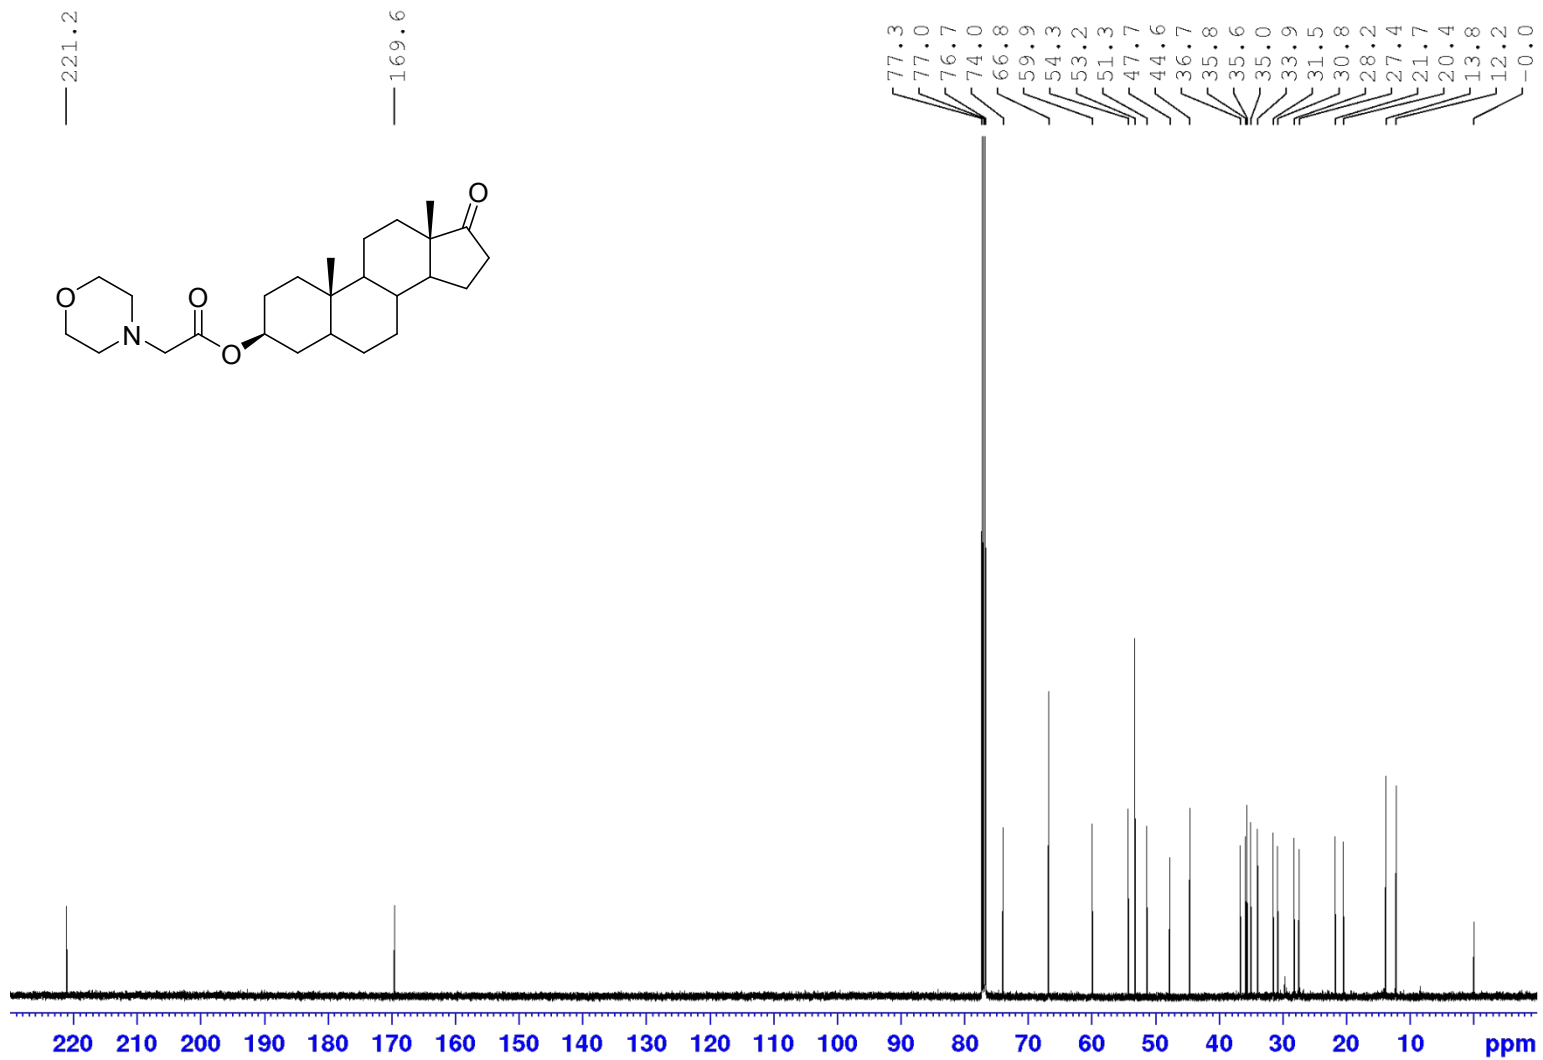

Epiandrosterone 2-(4-methylpiperazin-1-yl)ethane-1-sulfonate (23) – <sup>1</sup>H – CDCl<sub>3</sub> – 500 MHz

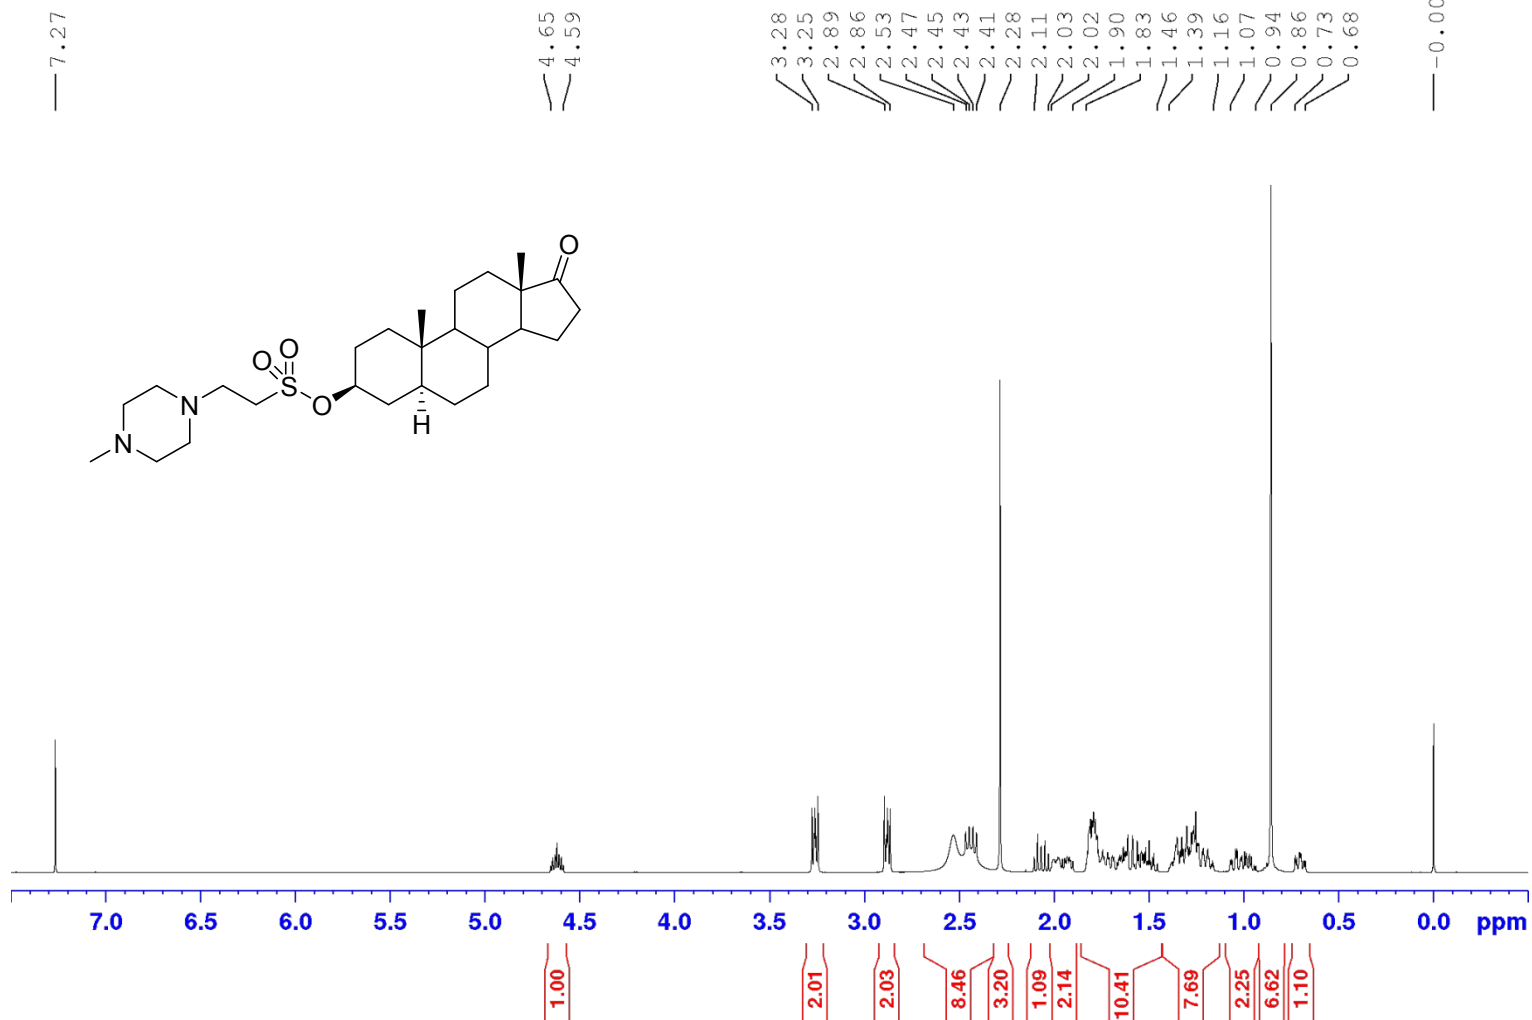

Epiandrosterone 2-(4-methylpiperazin-1-yl)ethane-1-sulfonate (23) –  $^{13}\text{C}$  –  $\text{CDCl}_3$  – 125 MHz

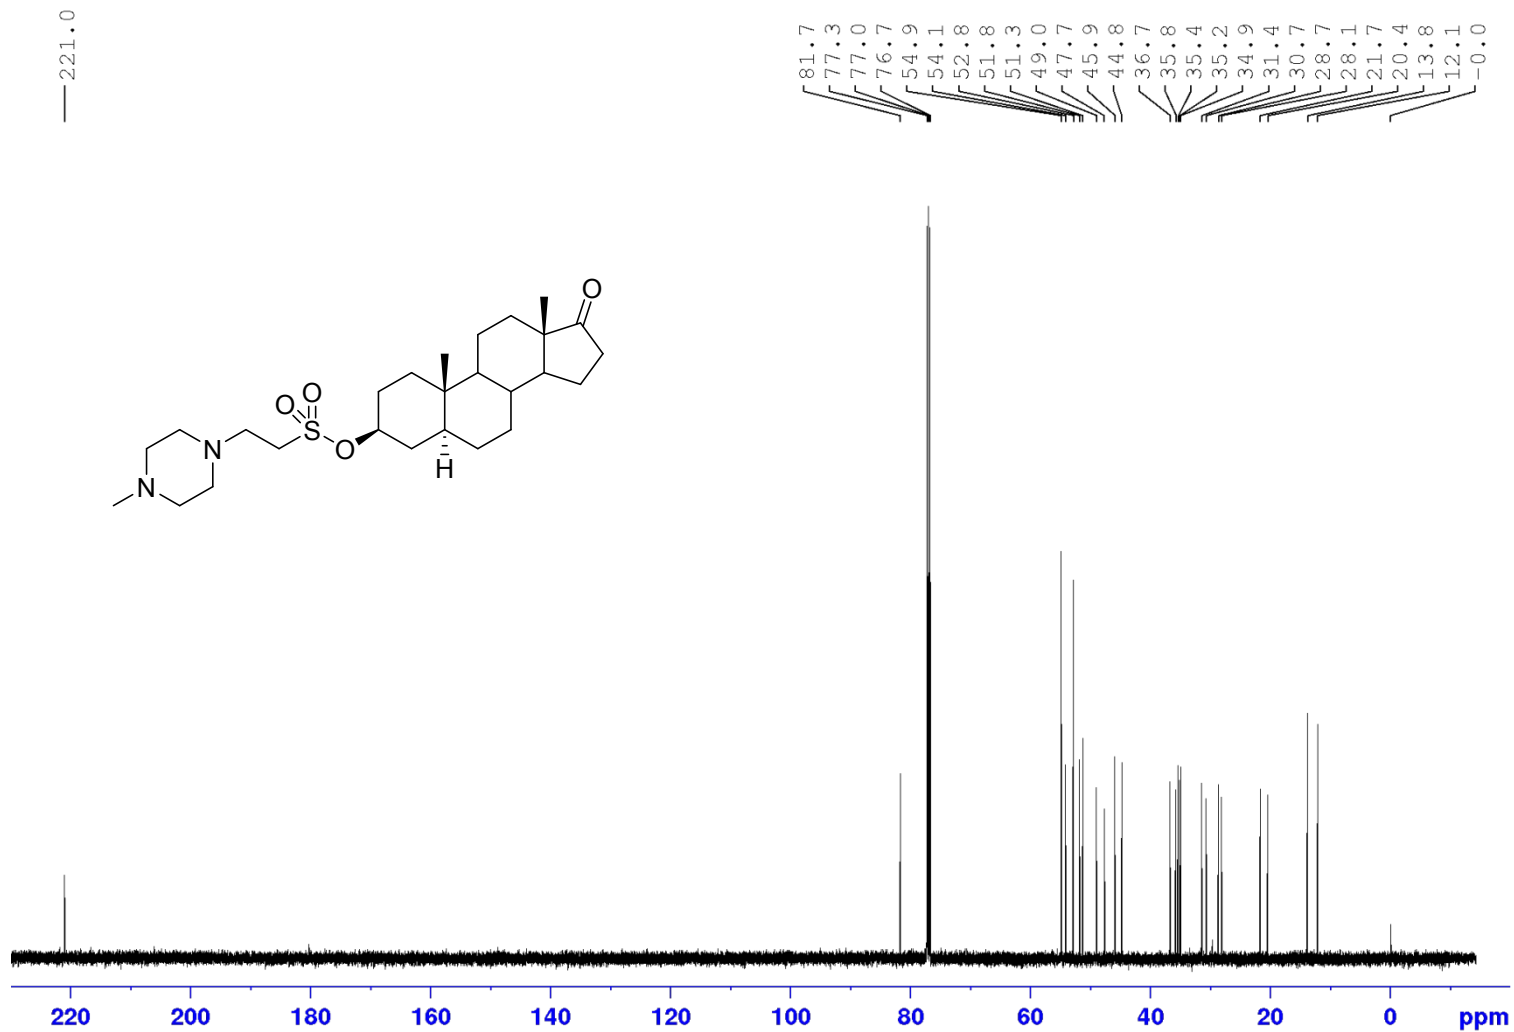

— 221.0

Epiandrosterone 2-morpholinoethanesulfonate (24) –  $^1\text{H}$  –  $\text{CDCl}_3$  – 500 MHz

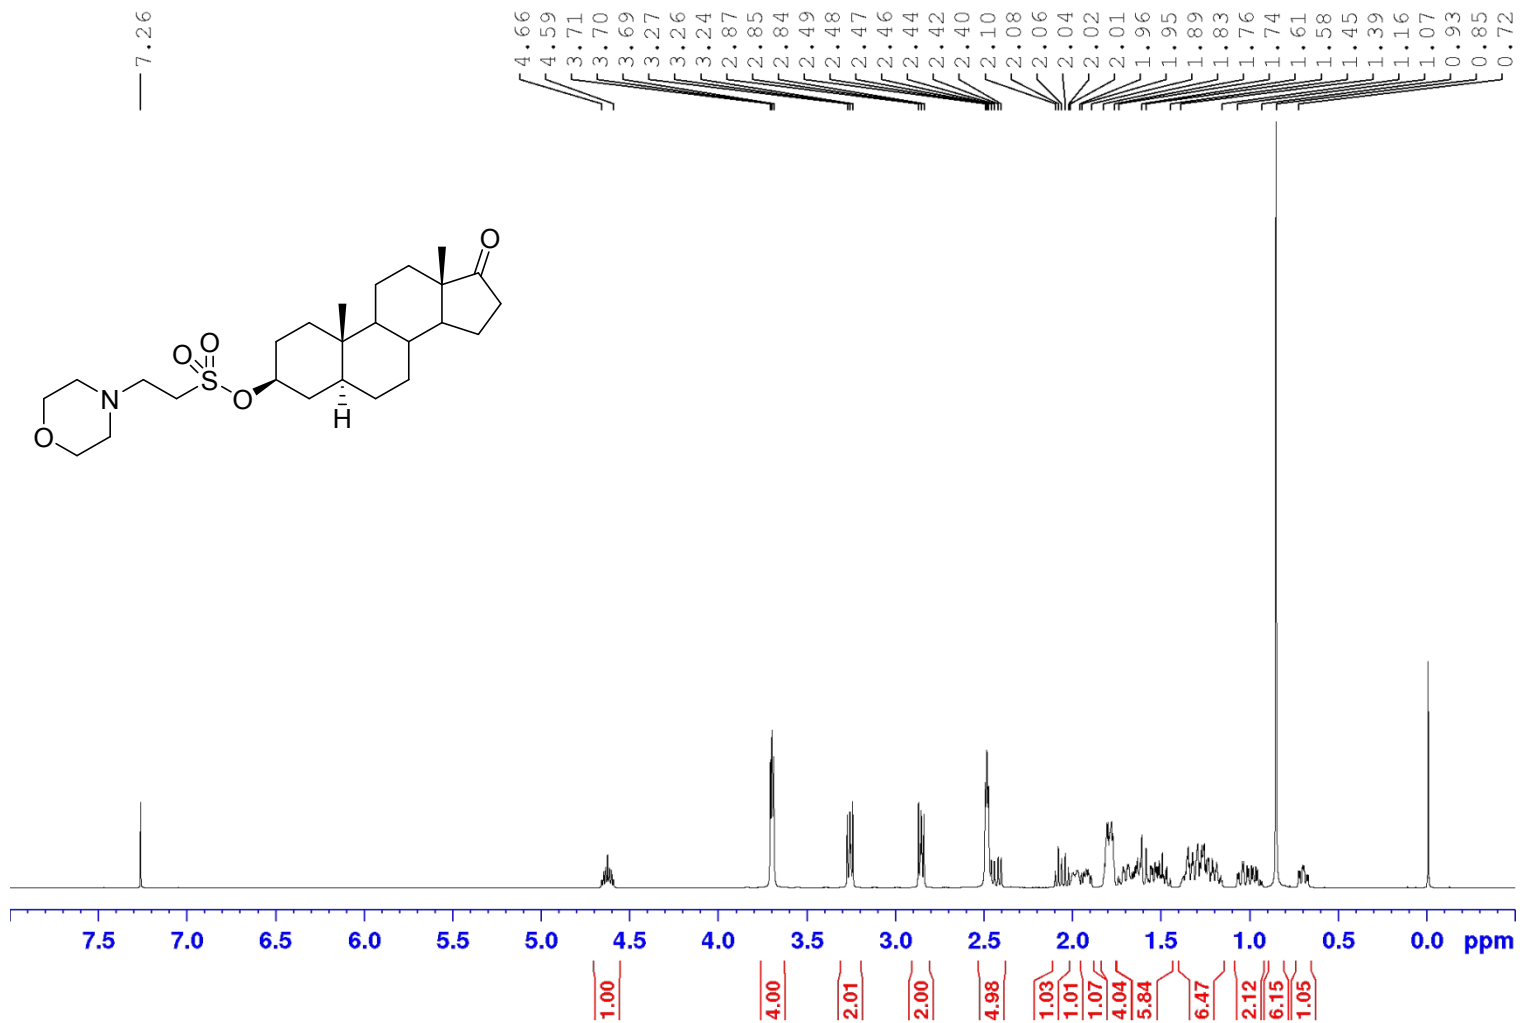

— 221.0

Epiandrosterone 2-morpholinoethanesulfonate (24) —  $^{13}\text{C}$  —  $\text{CDCl}_3$  — 125 MH

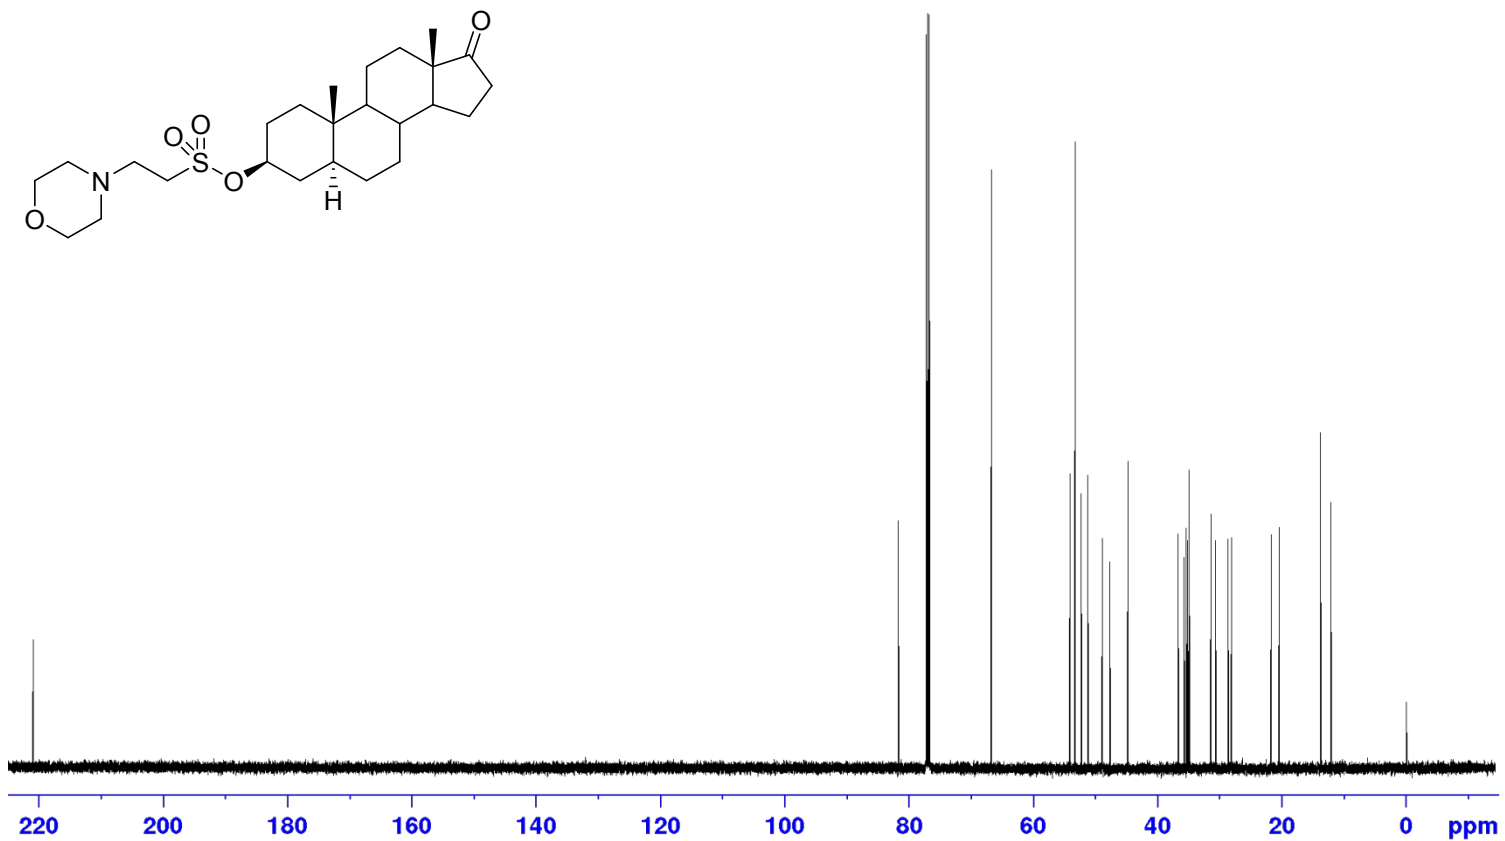

Epiandrosterone 17-acetal (25) –  $^1\text{H}$  –  $\text{CDCl}_3$  – 500 MHz

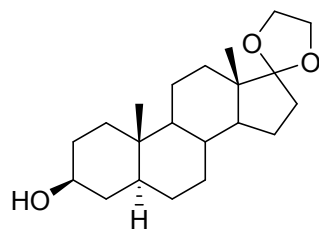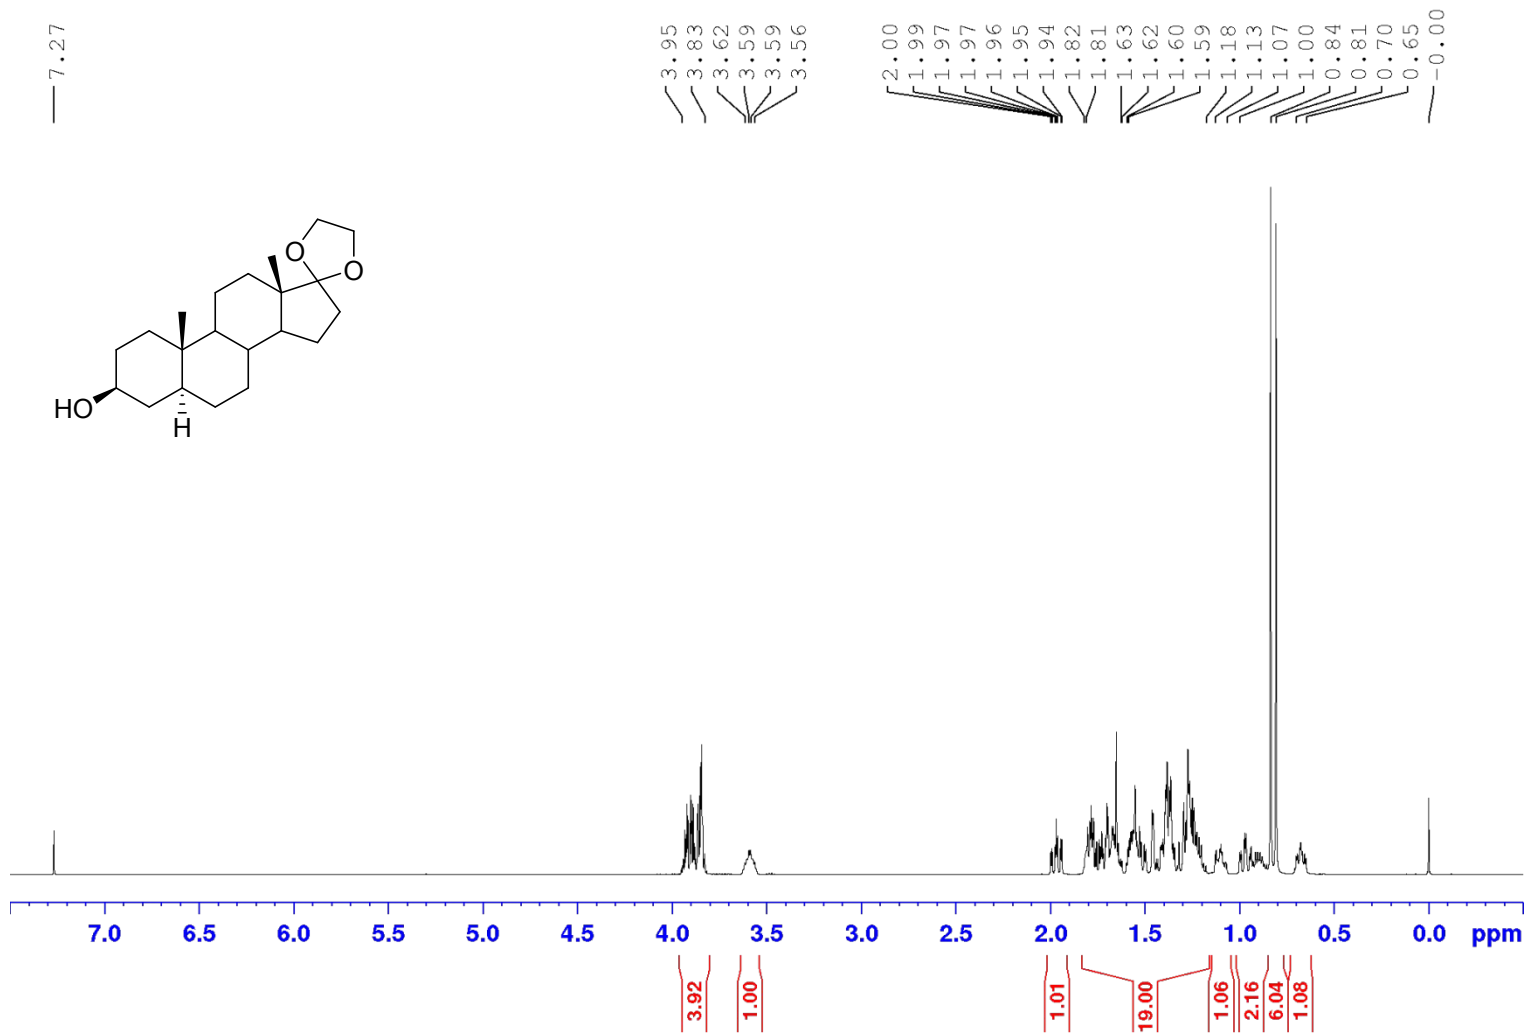



Epiandrosterone 17-acetal (25) –  $^{13}\text{C}$  –  $\text{CDCl}_3$  – 125 MHz

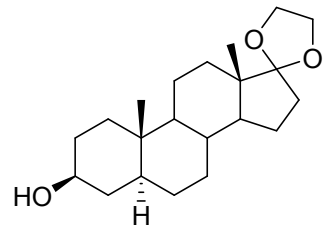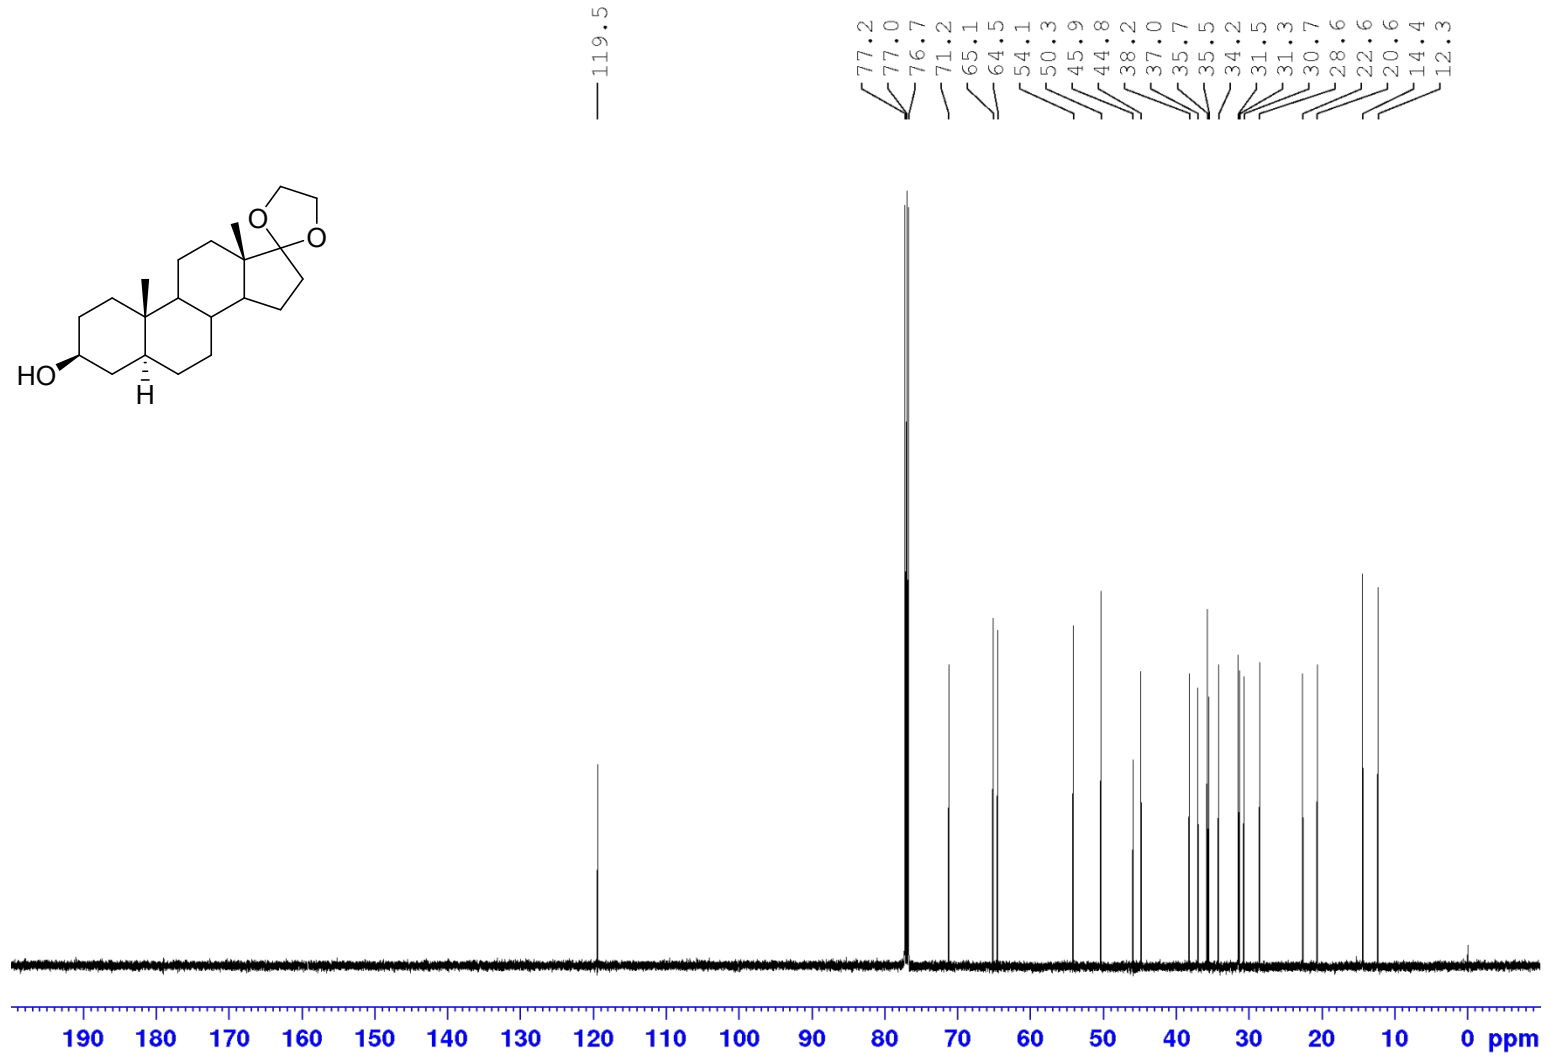

Epiandrosterone 17-acetal methyl ether (26) –  $^1\text{H}$  –  $\text{CDCl}_3$  – 500 MHz

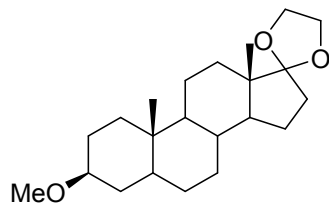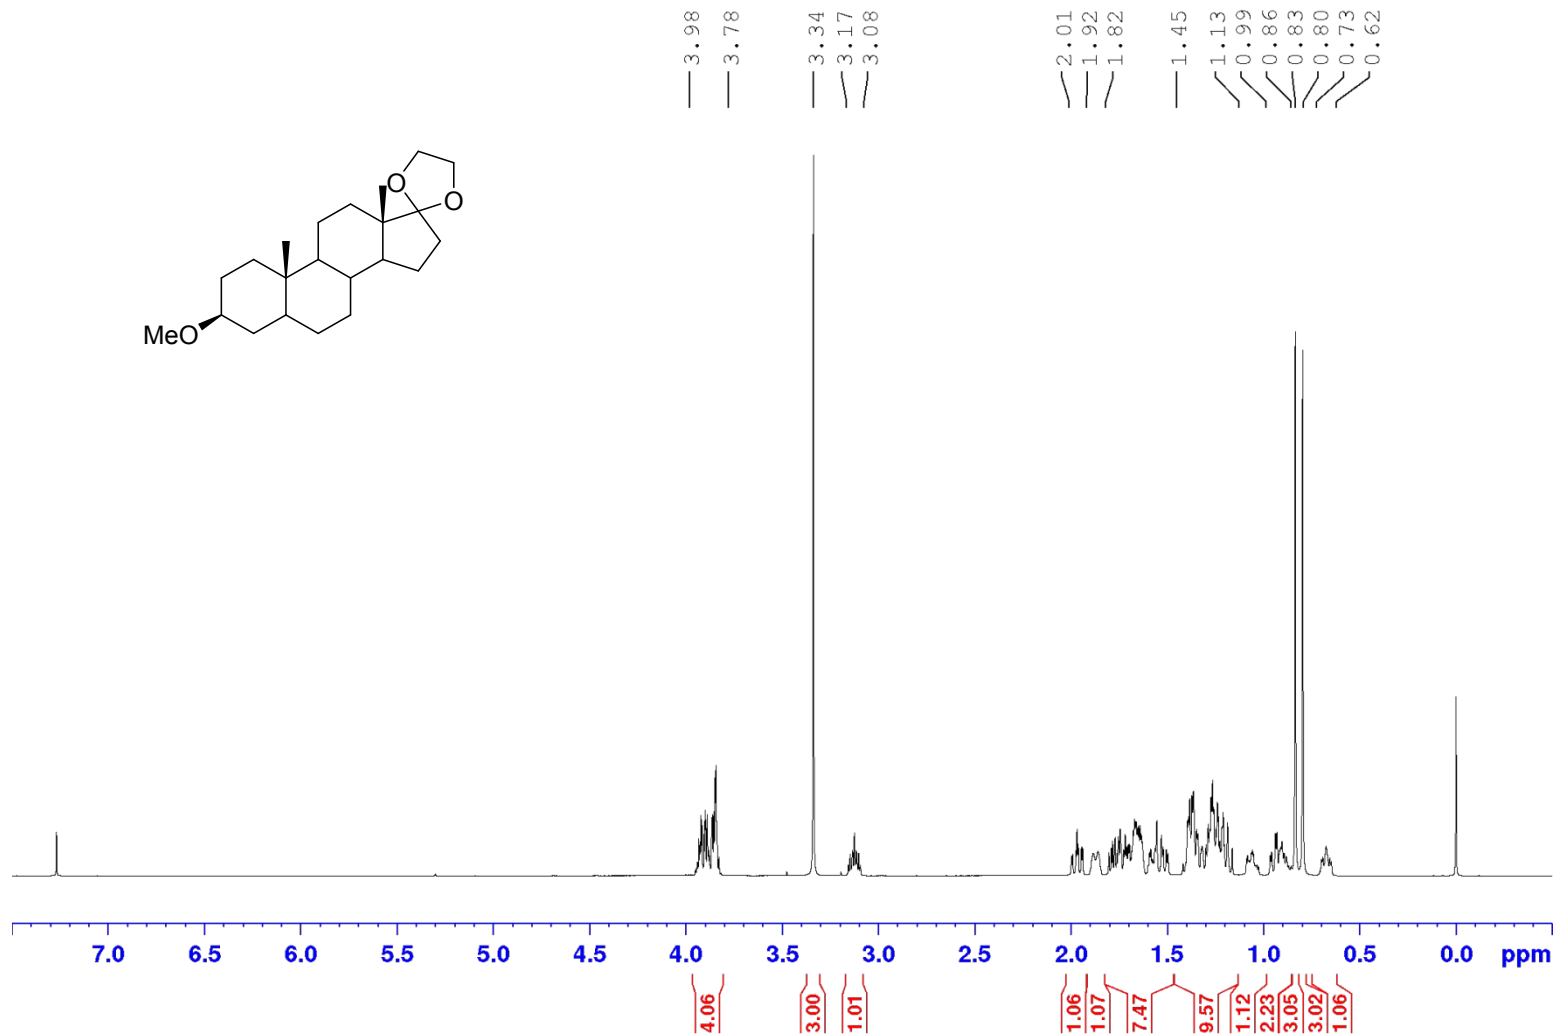

Epiandrosterone 17-acetal methyl ether (26) –  $^{13}\text{C}$  –  $\text{CDCl}_3$  – 125 MHz

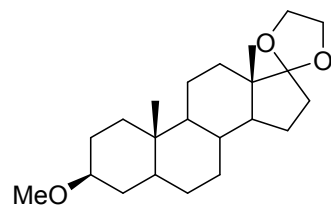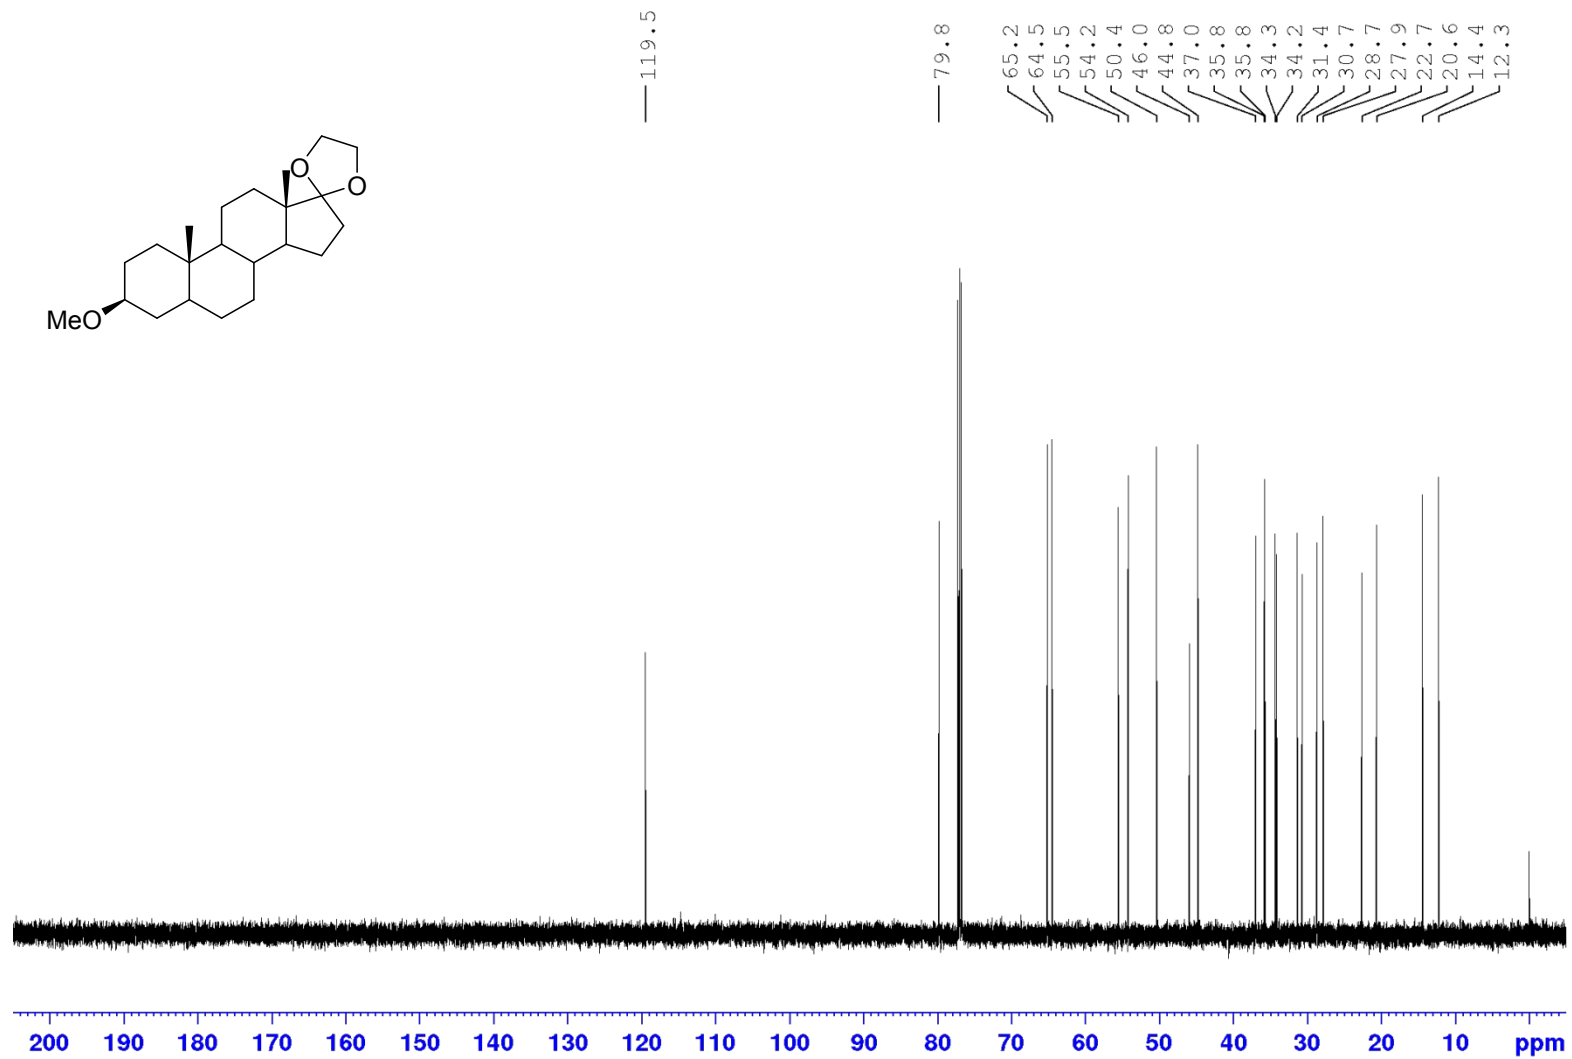

Epiandrosterone methyl ether (27) – <sup>1</sup>H – CDCl<sub>3</sub> – 500 MHz

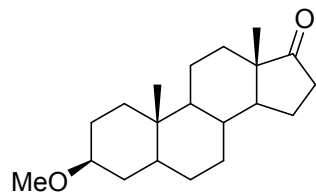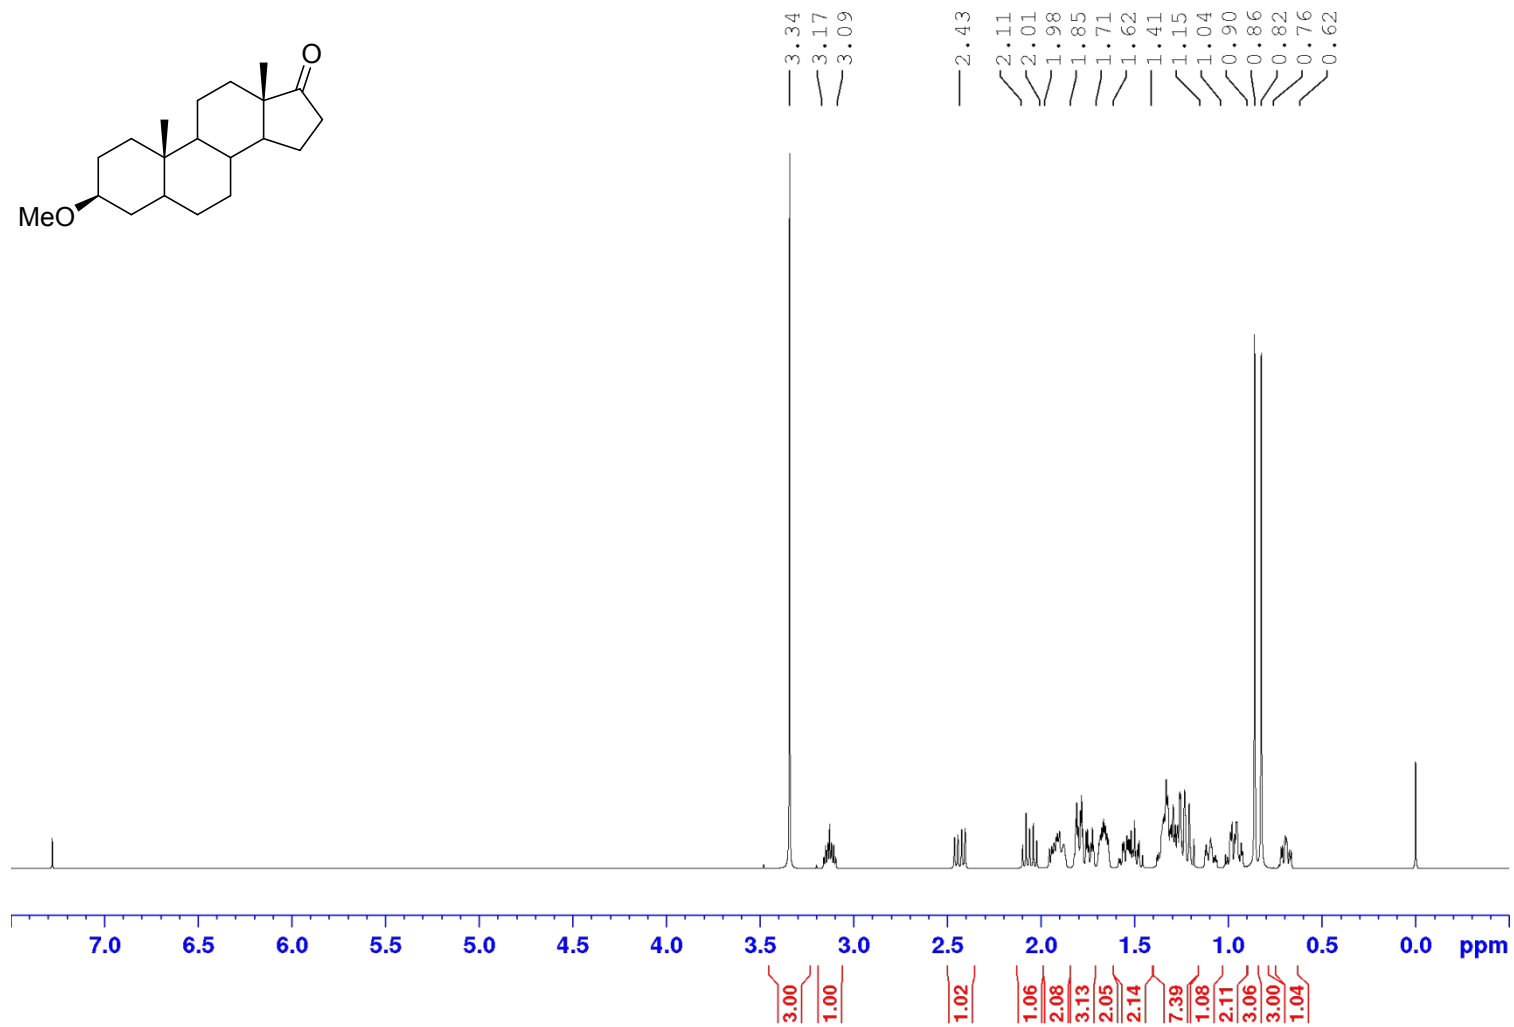

Epiandrosterone methyl ether (27) –  $^{13}\text{C}$  –  $\text{CDCl}_3$  – 125 MHz

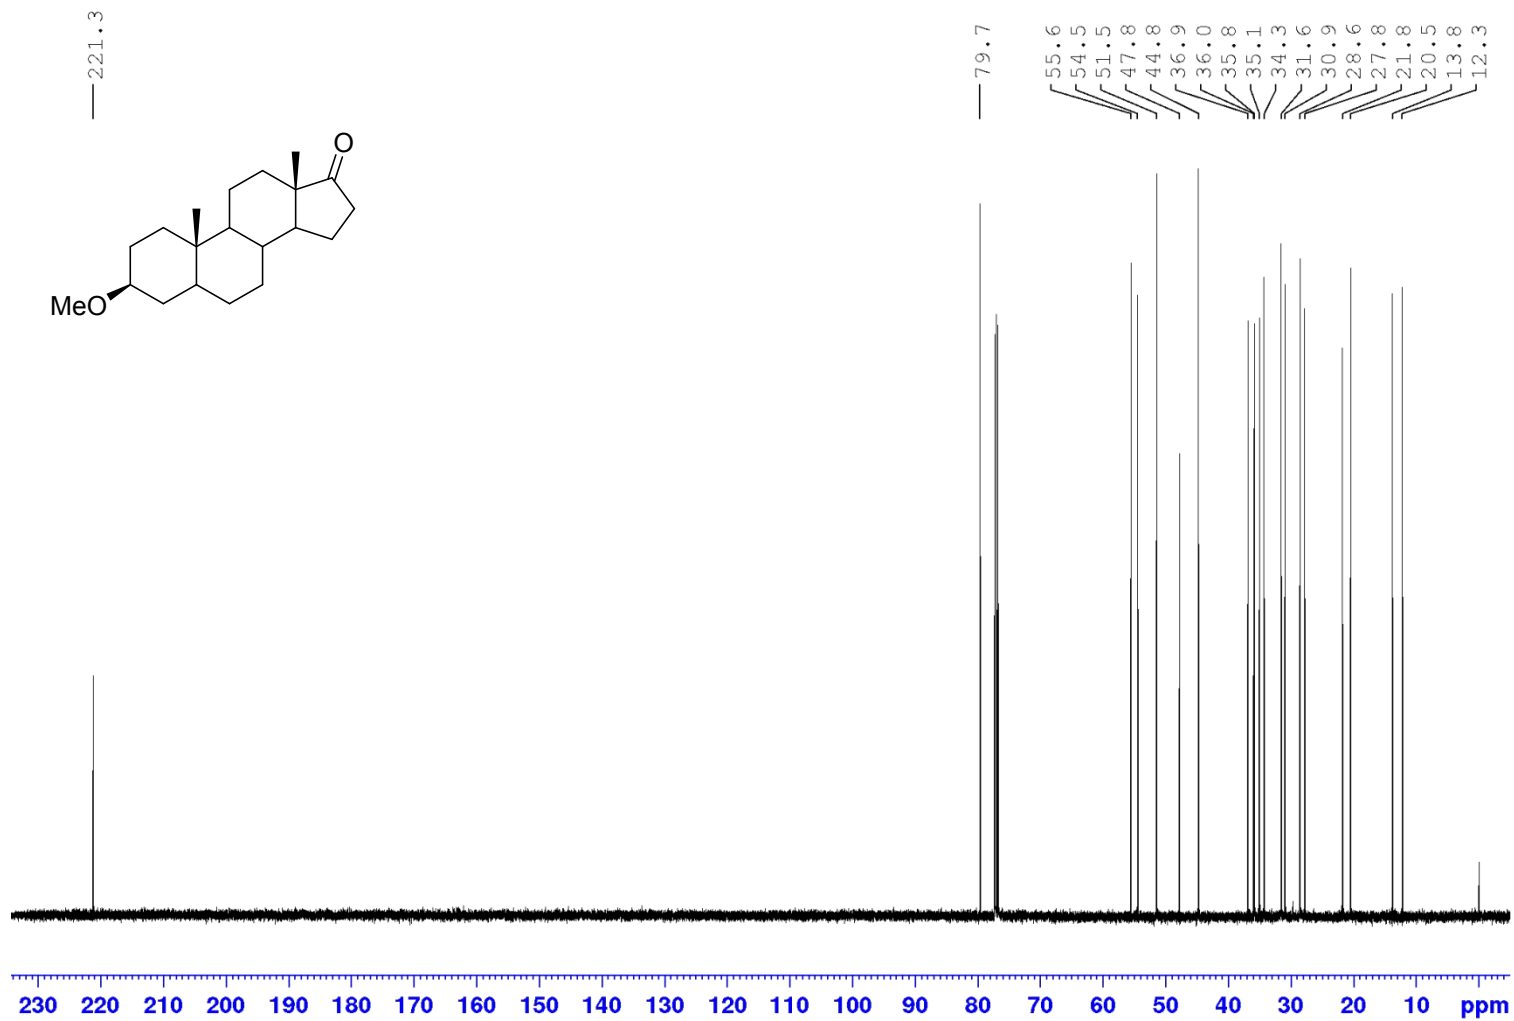

16 $\alpha$ -Bromoepiandrosterone methyl ether (28) –  $^1\text{H}$  –  $\text{CDCl}_3$  – 500 MHz

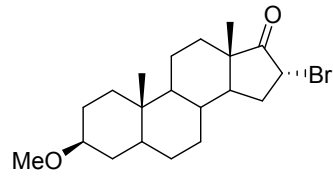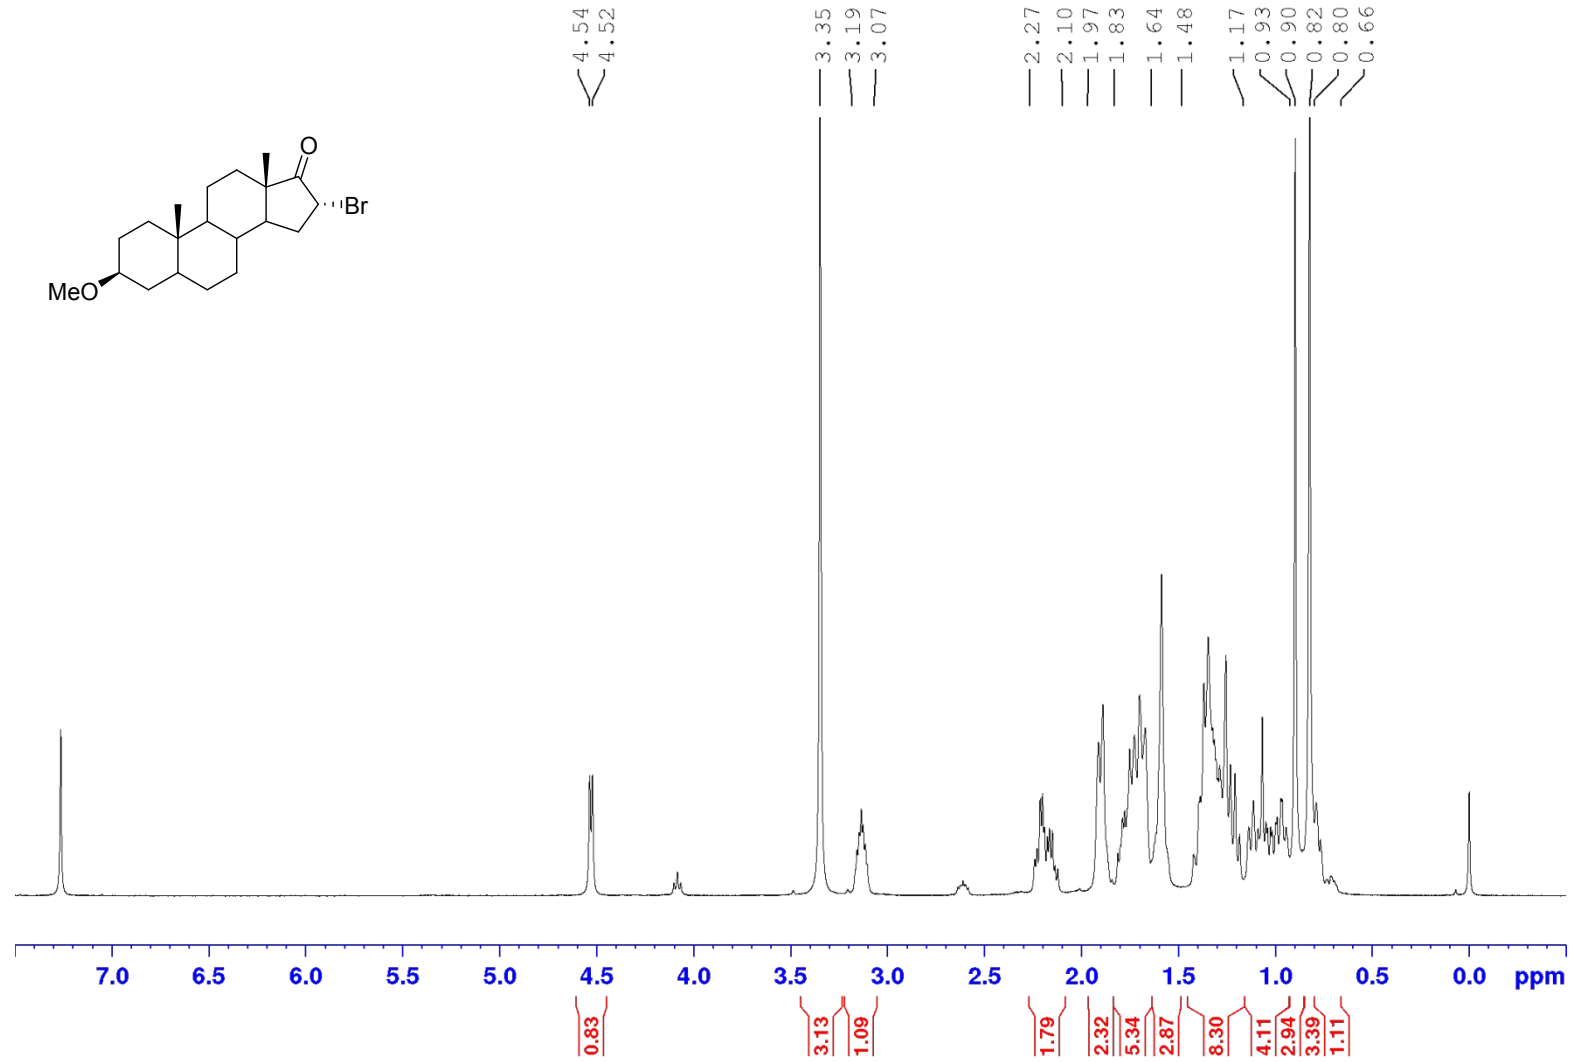

16 $\alpha$ -Bromoepiandrosterone methyl ether (28) –  $^{13}\text{C}$  –  $\text{CDCl}_3$  – 125 MHz

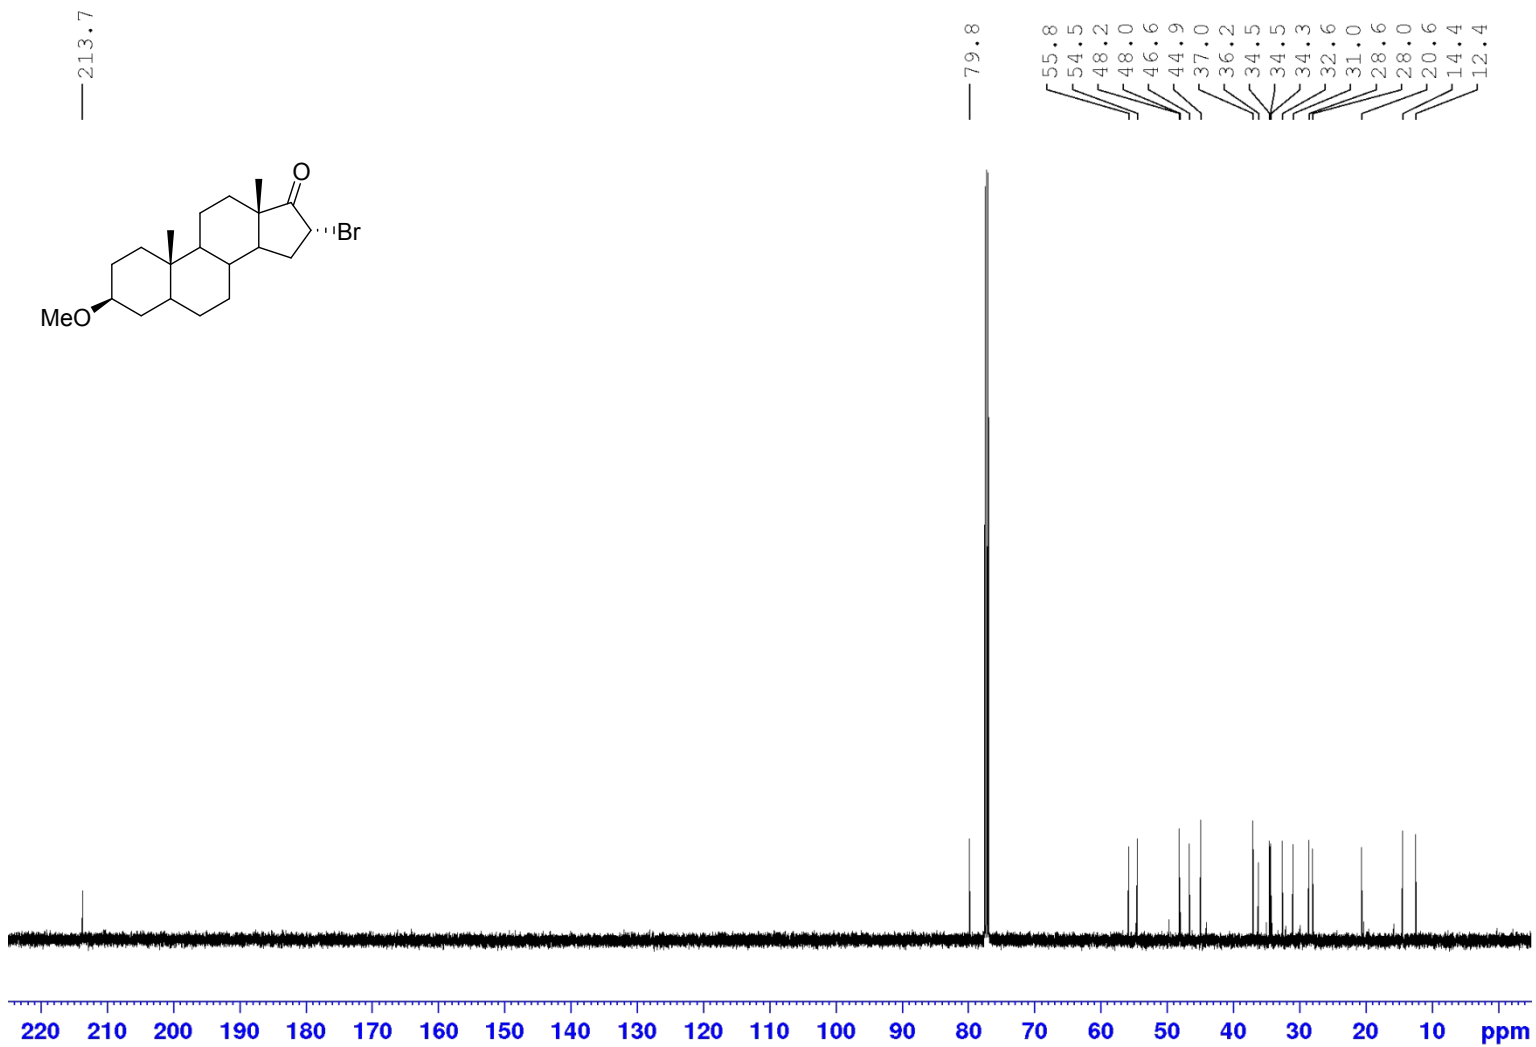

Isobutyl-4-toluenesulfonate (29) –  $^1\text{H}$  –  $\text{CDCl}_3$  – 500 MHz

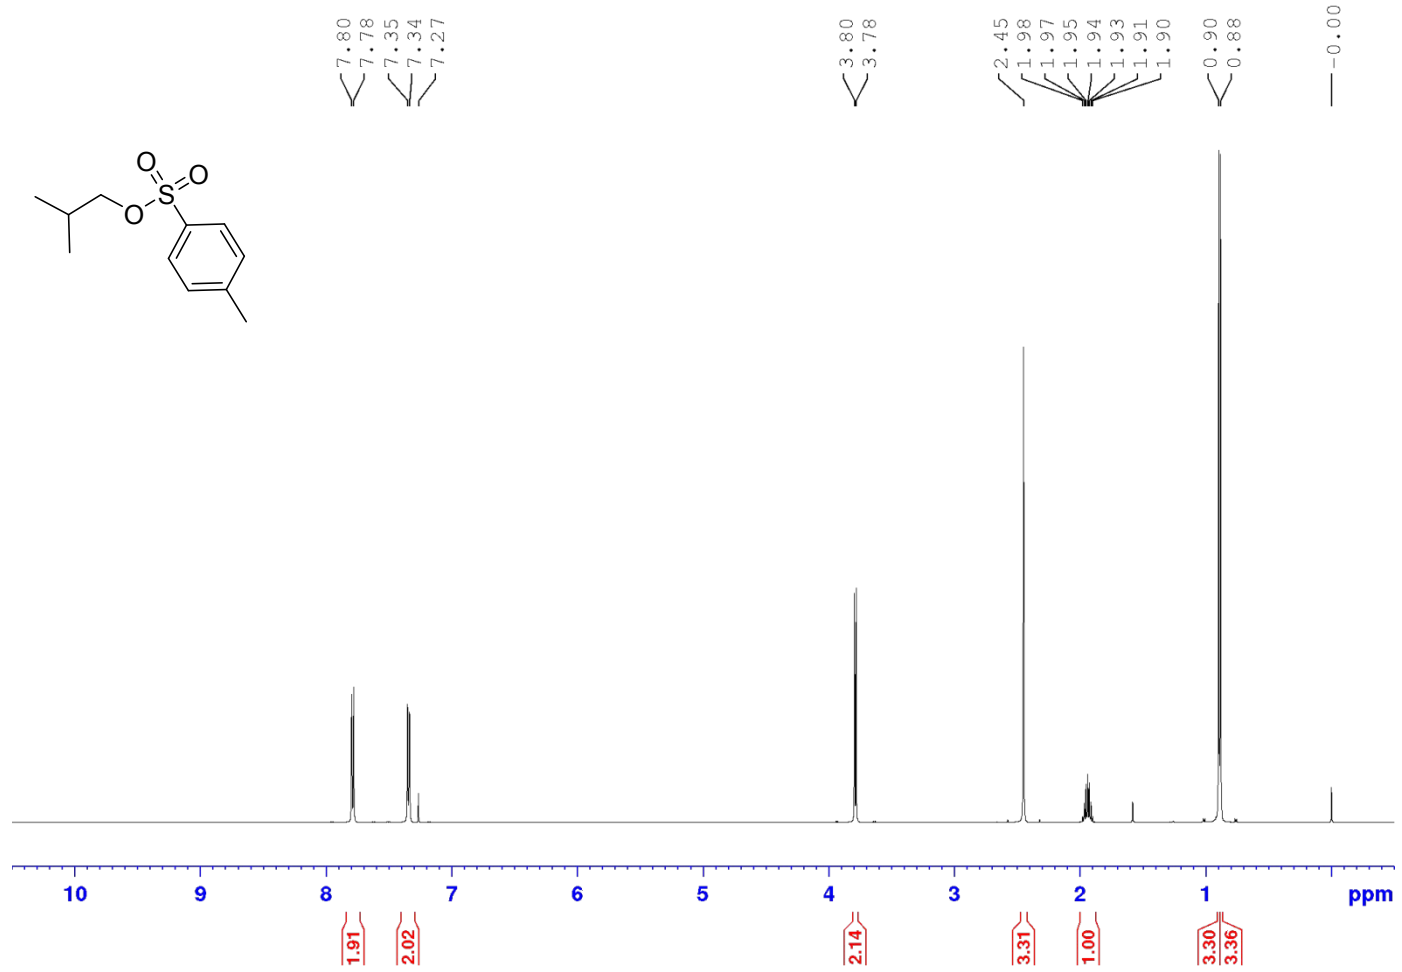



Isobutyl-4-toluenesulfonate (29) –  $^{13}\text{C}$  –  $\text{CDCl}_3$  – 125 MHz

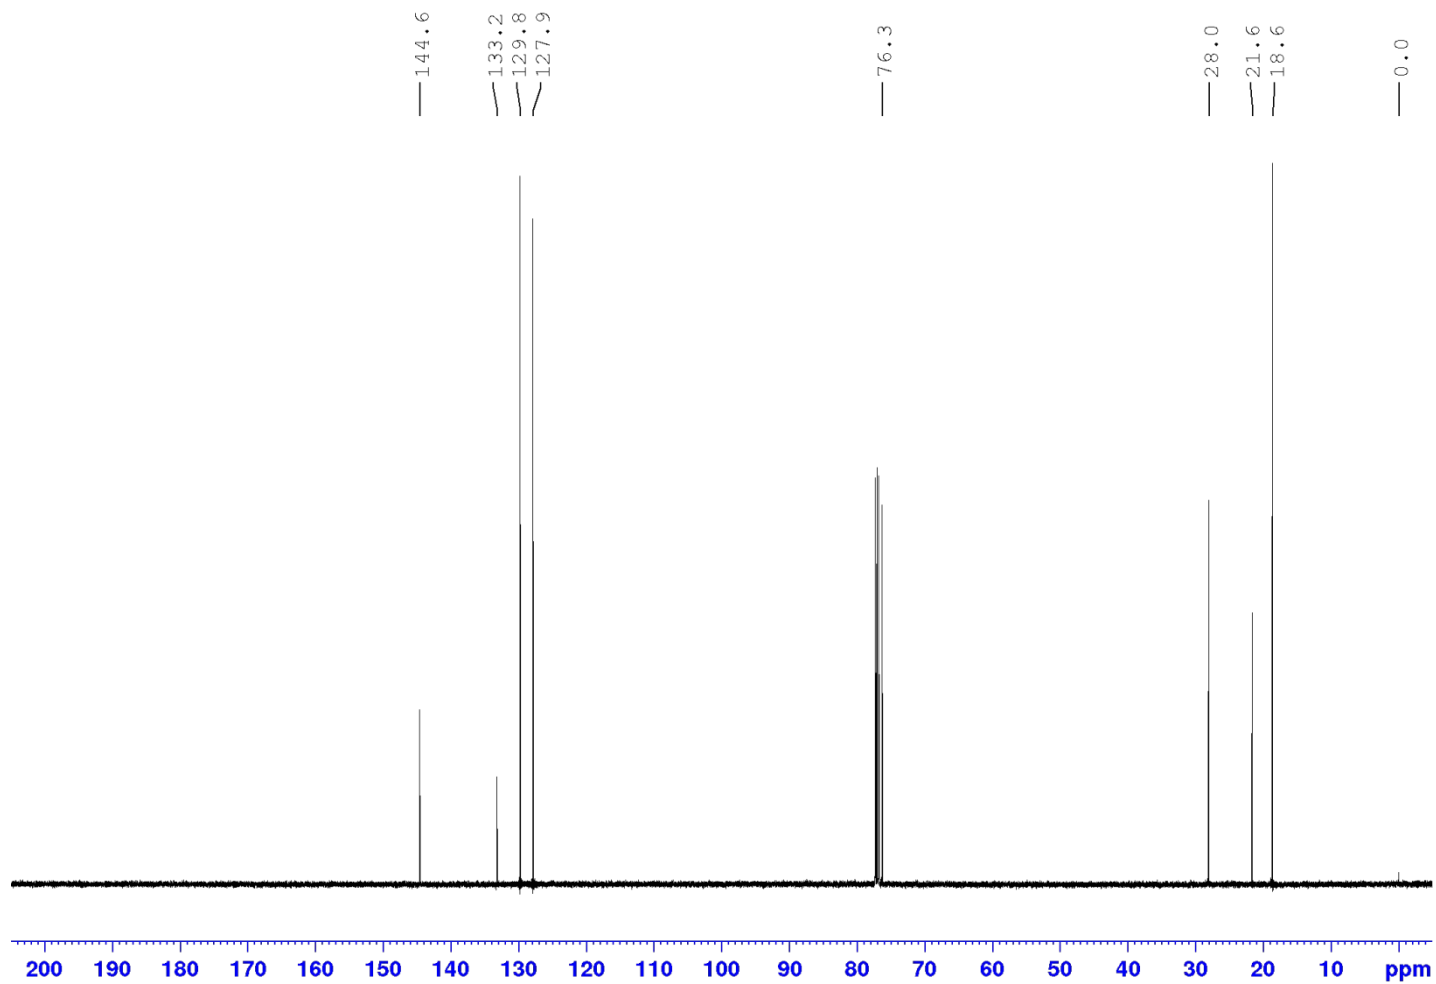

Epiandrosterone 17-acetal isobutyl ether (30) –  $^1\text{H}$  –  $\text{CDCl}_3$  – 500 MHz

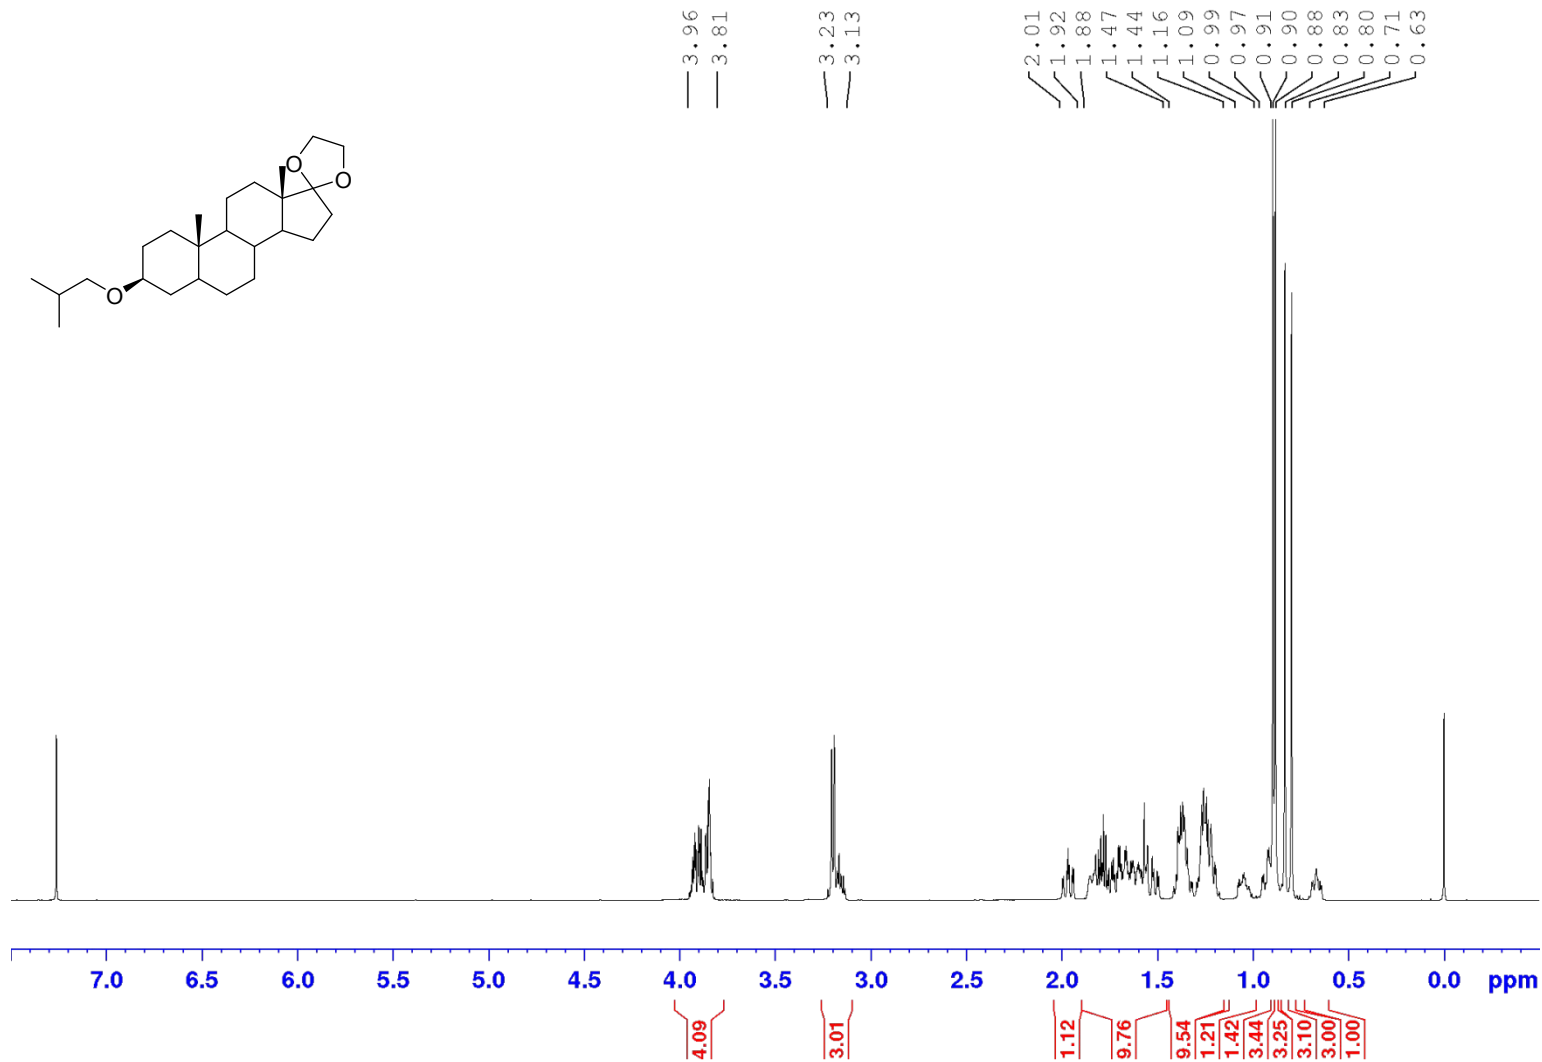

Epiandrosterone 17-acetal isobutyl ether (30) –  $^{13}\text{C}$  –  $\text{CDCl}_3$  – 125 MHz

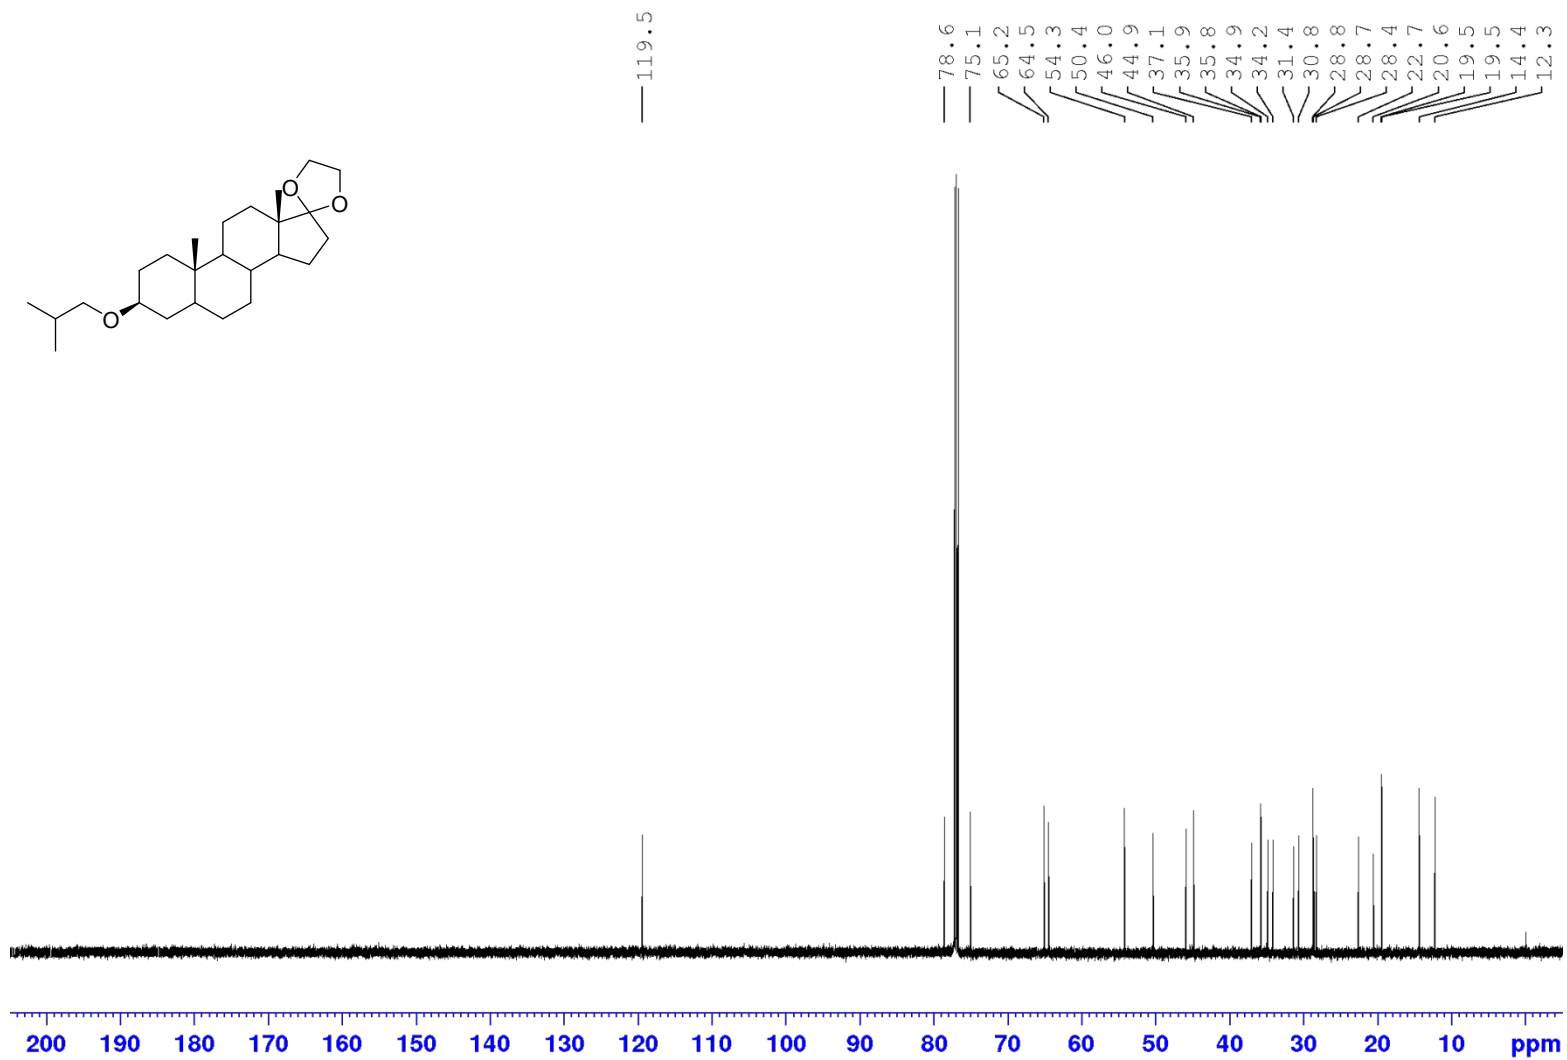

Epiandrosterone isobutyl ether (31) – <sup>1</sup>H – CDCl<sub>3</sub> – 500 MHz

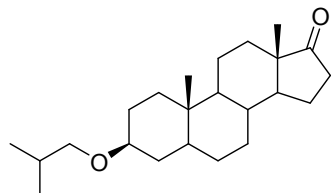

— 3.26  
— 3.10  
2.46  
2.44  
2.42  
2.40  
2.12  
2.00  
1.98  
1.60  
1.43  
1.17  
1.14  
1.03  
0.93  
0.90  
0.89  
0.86  
0.83  
0.74  
0.64

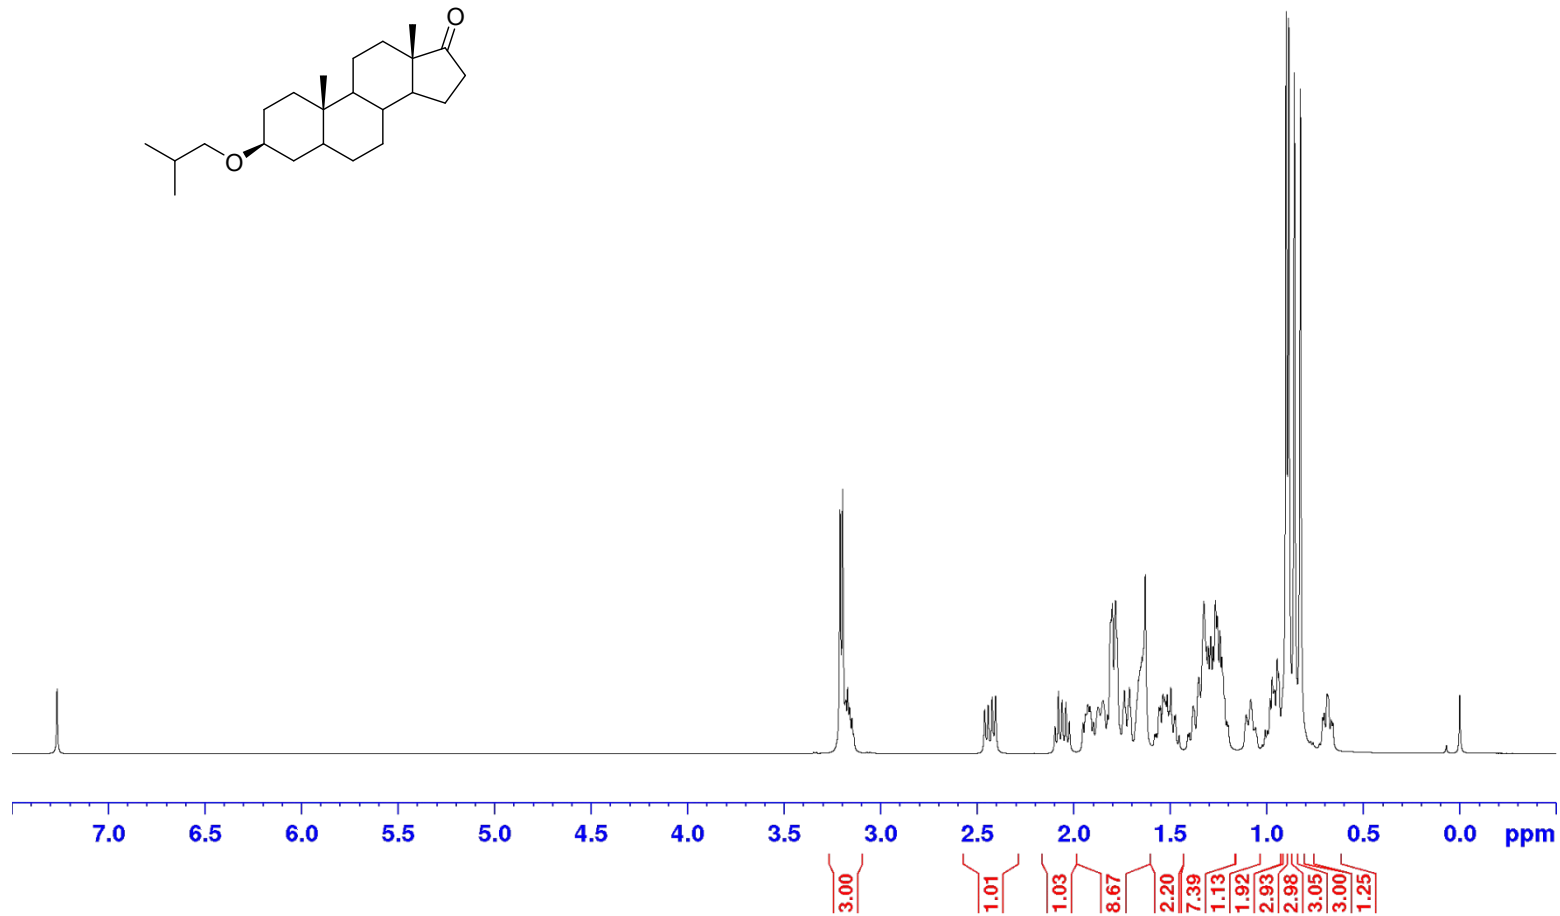

Epiandrosterone isobutyl ether (31) –  $^{13}\text{C}$  –  $\text{CDCl}_3$  – 125 MHz

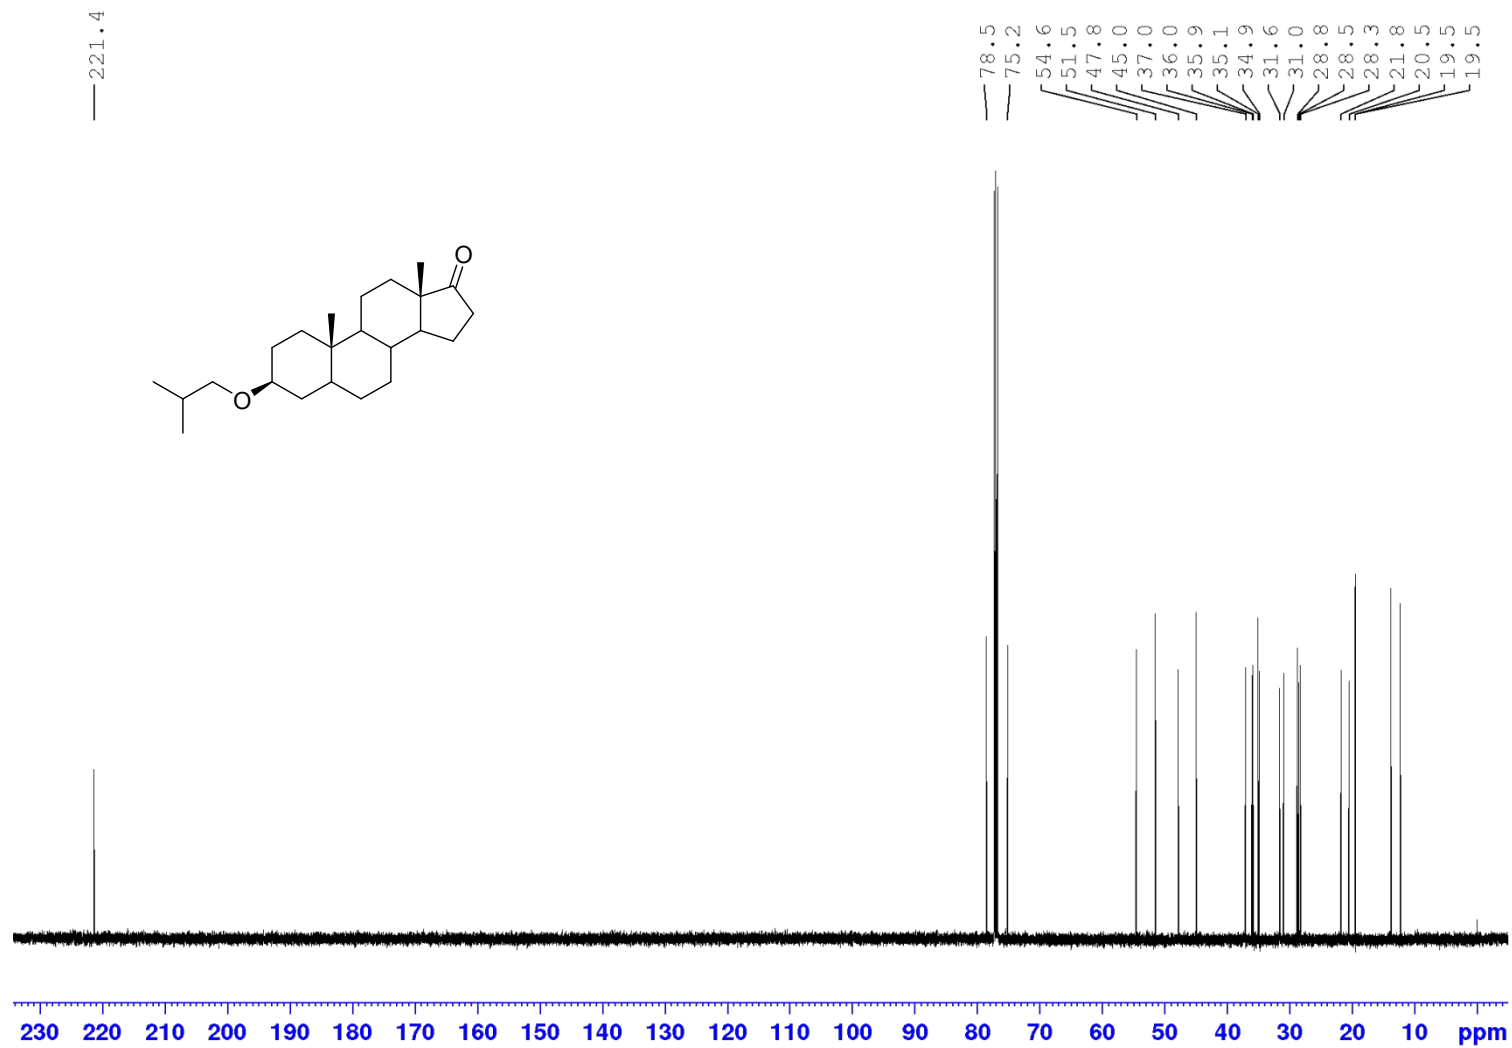

16 $\alpha$ -Bromoepiandrosterone isobutyl ether (32) –  $^1\text{H}$  –  $\text{CDCl}_3$  – 500 MHz

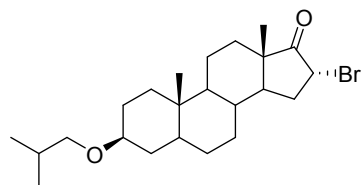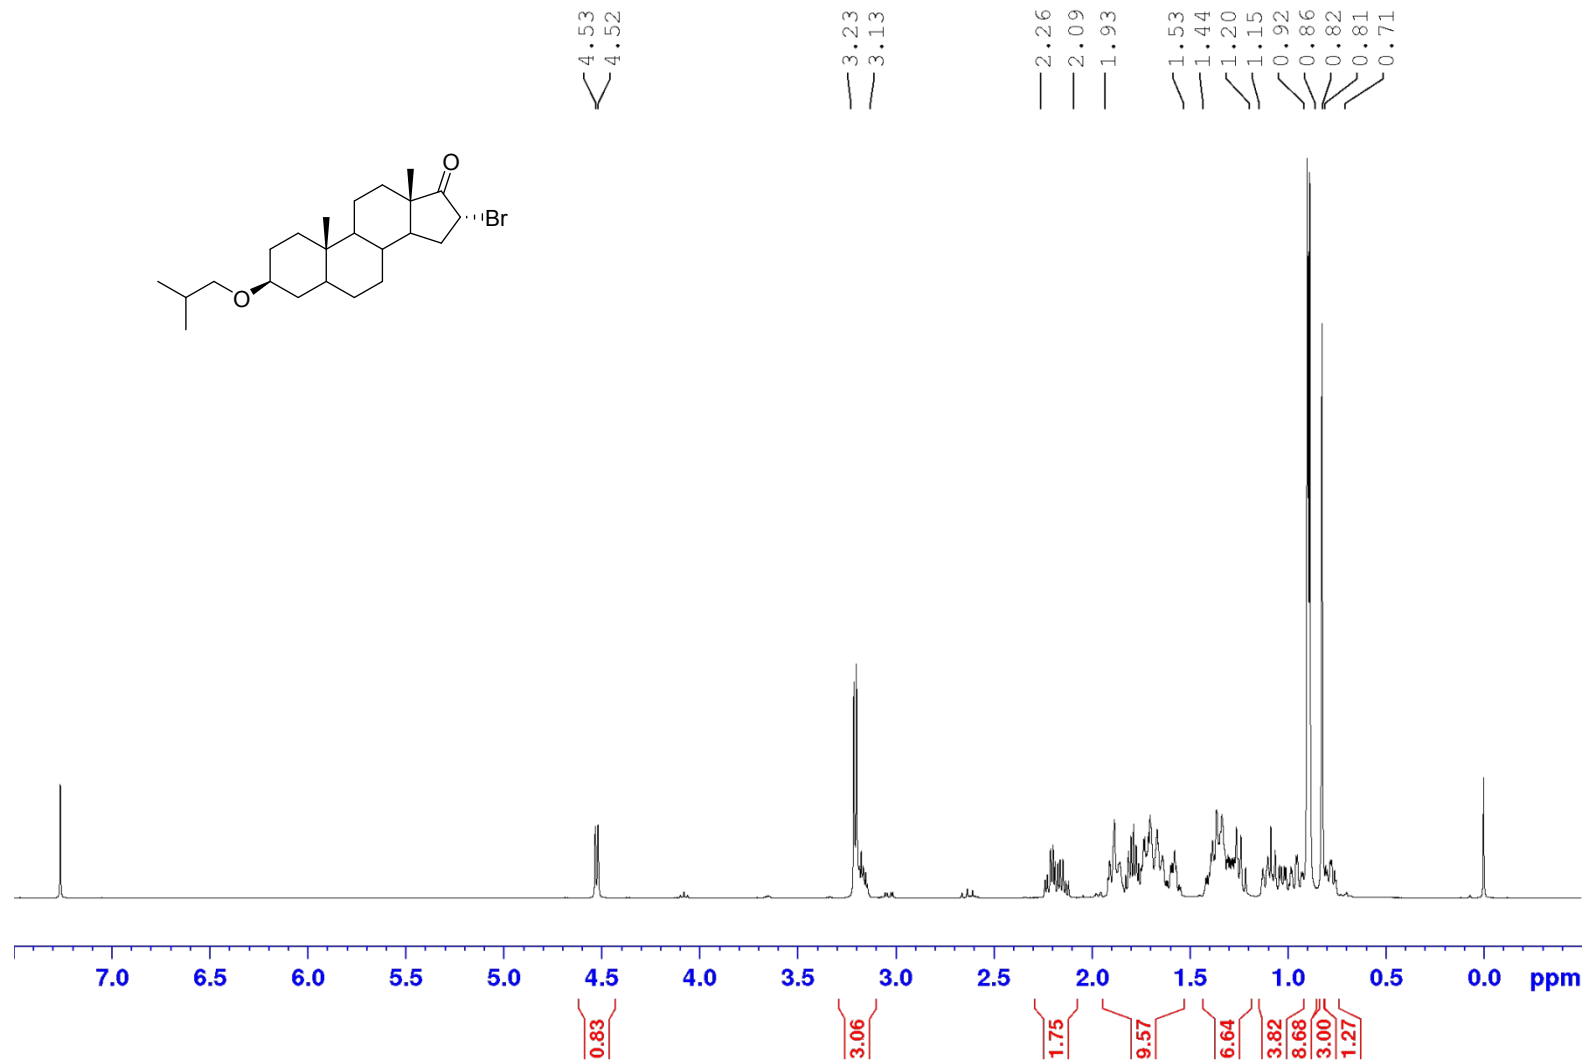

16 $\alpha$ -Bromoepiandrosterone isobutyl ether (32) –  $^{13}\text{C}$  –  $\text{CDCl}_3$  – 125 MHz

— 213.6

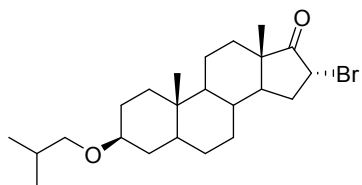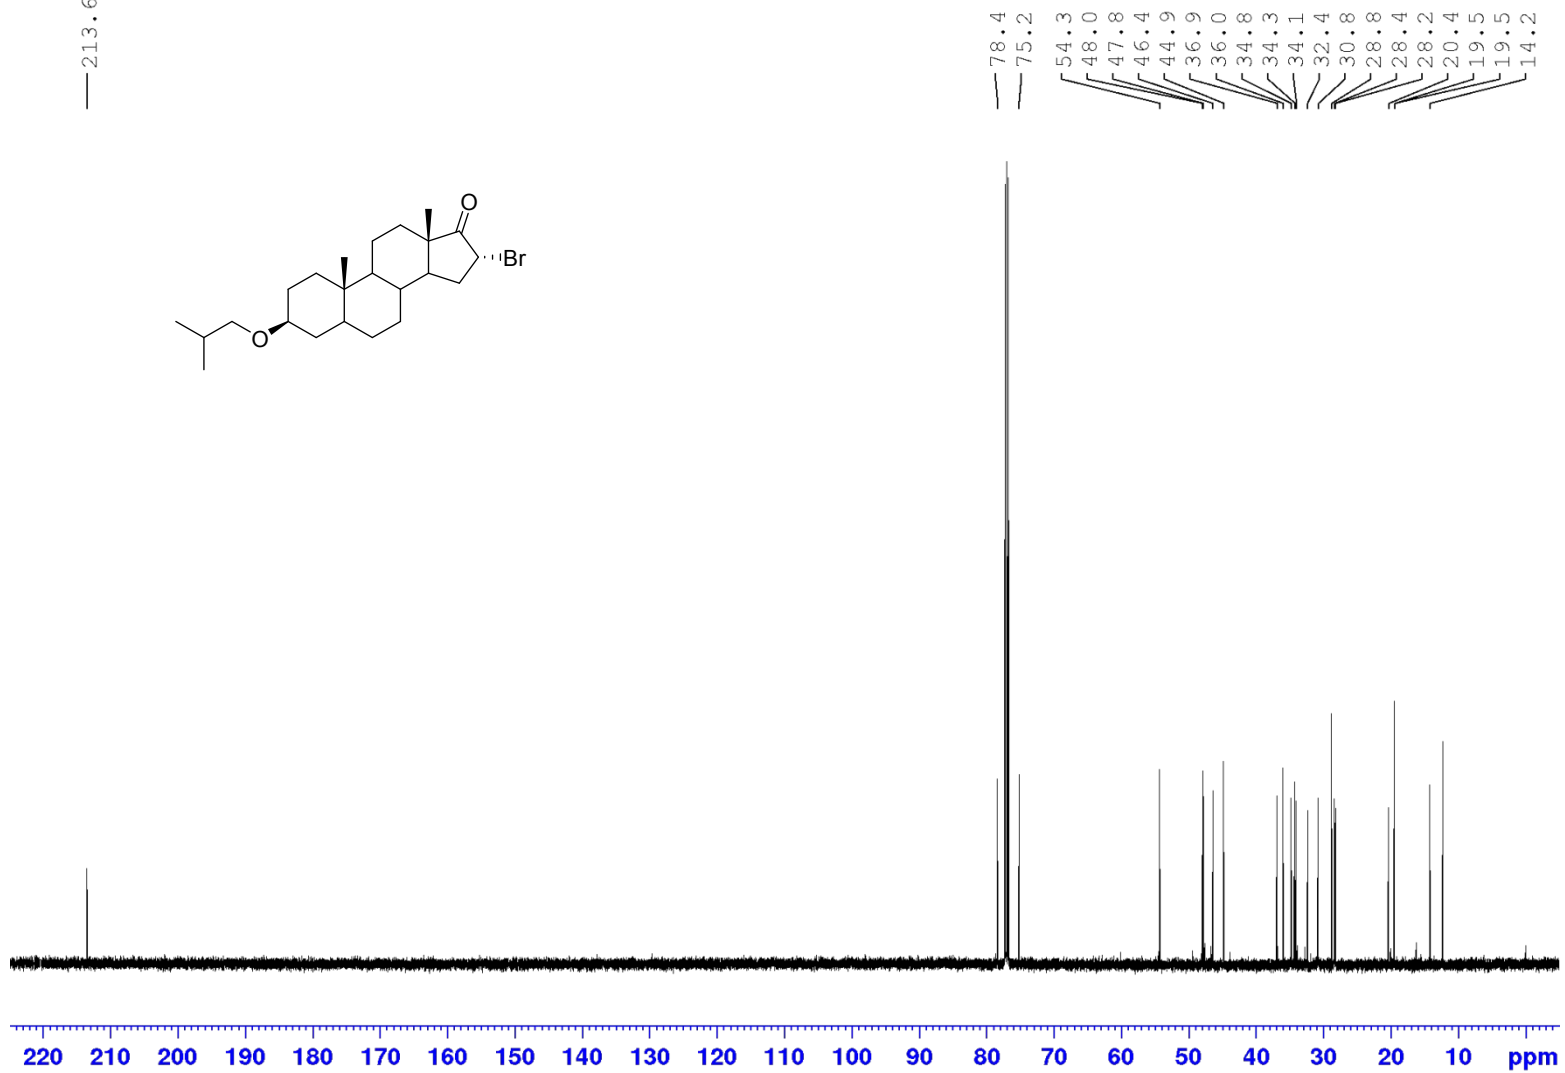

Epiandrosterone 2-morpholino-2-oxoethoxy ether (33) – <sup>1</sup>H – CDCl<sub>3</sub> – 500 MHz

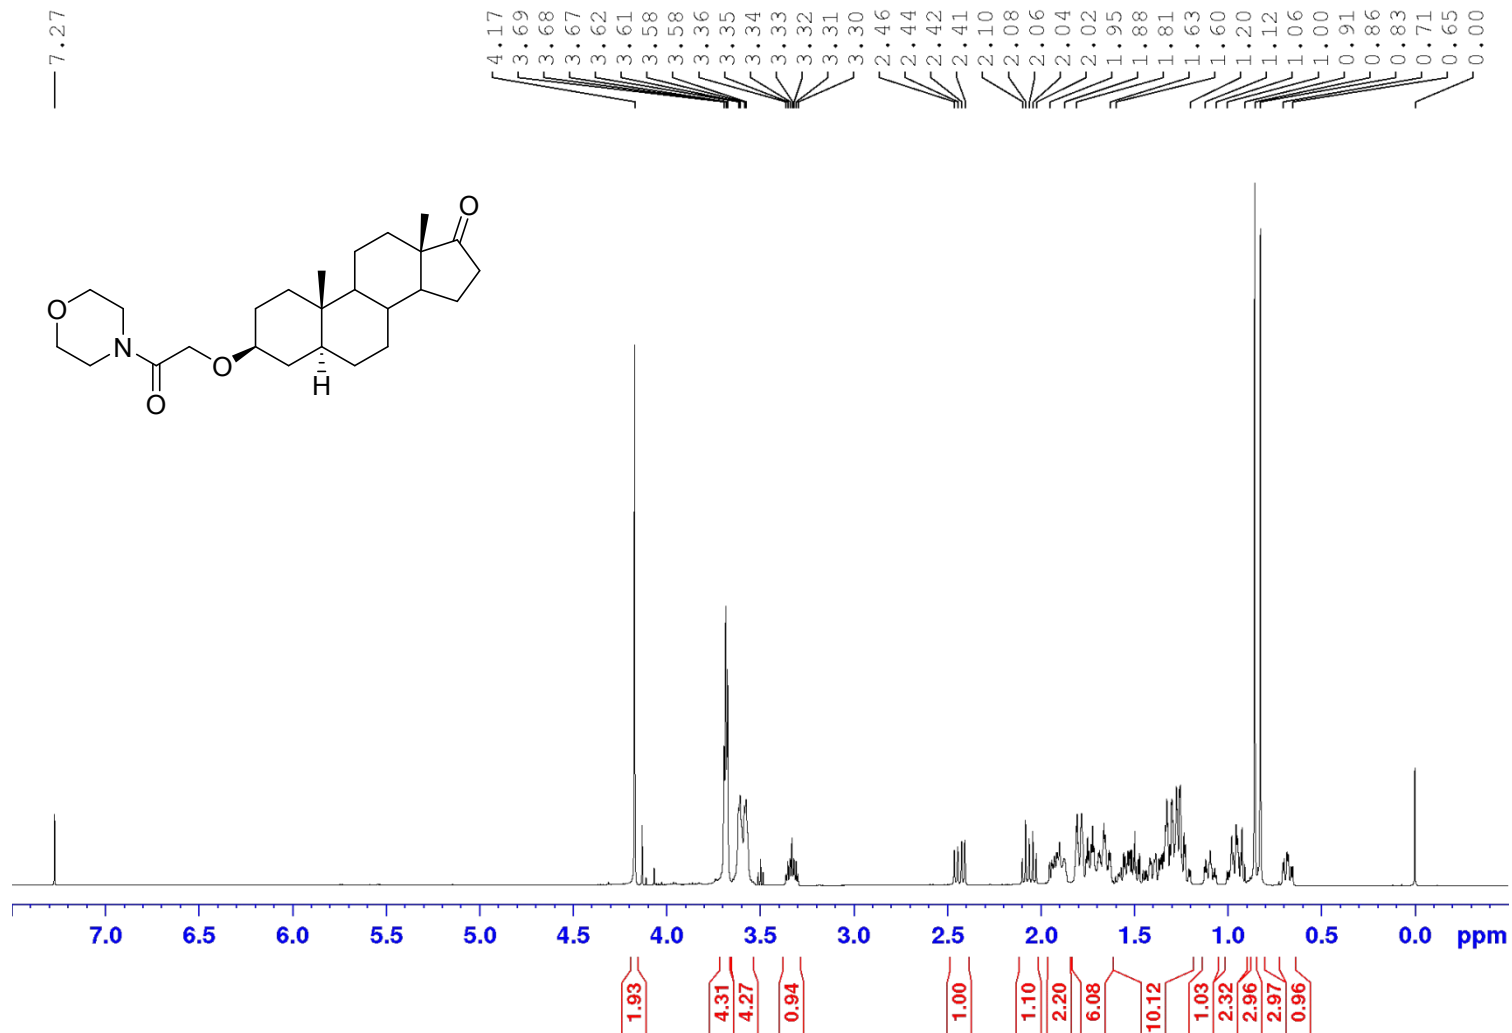



Epiandrosterone 2-morpholino-2-oxoethoxy ether (33) –  $^{13}\text{C}$  –  $\text{CDCl}_3$  – 125 MHz

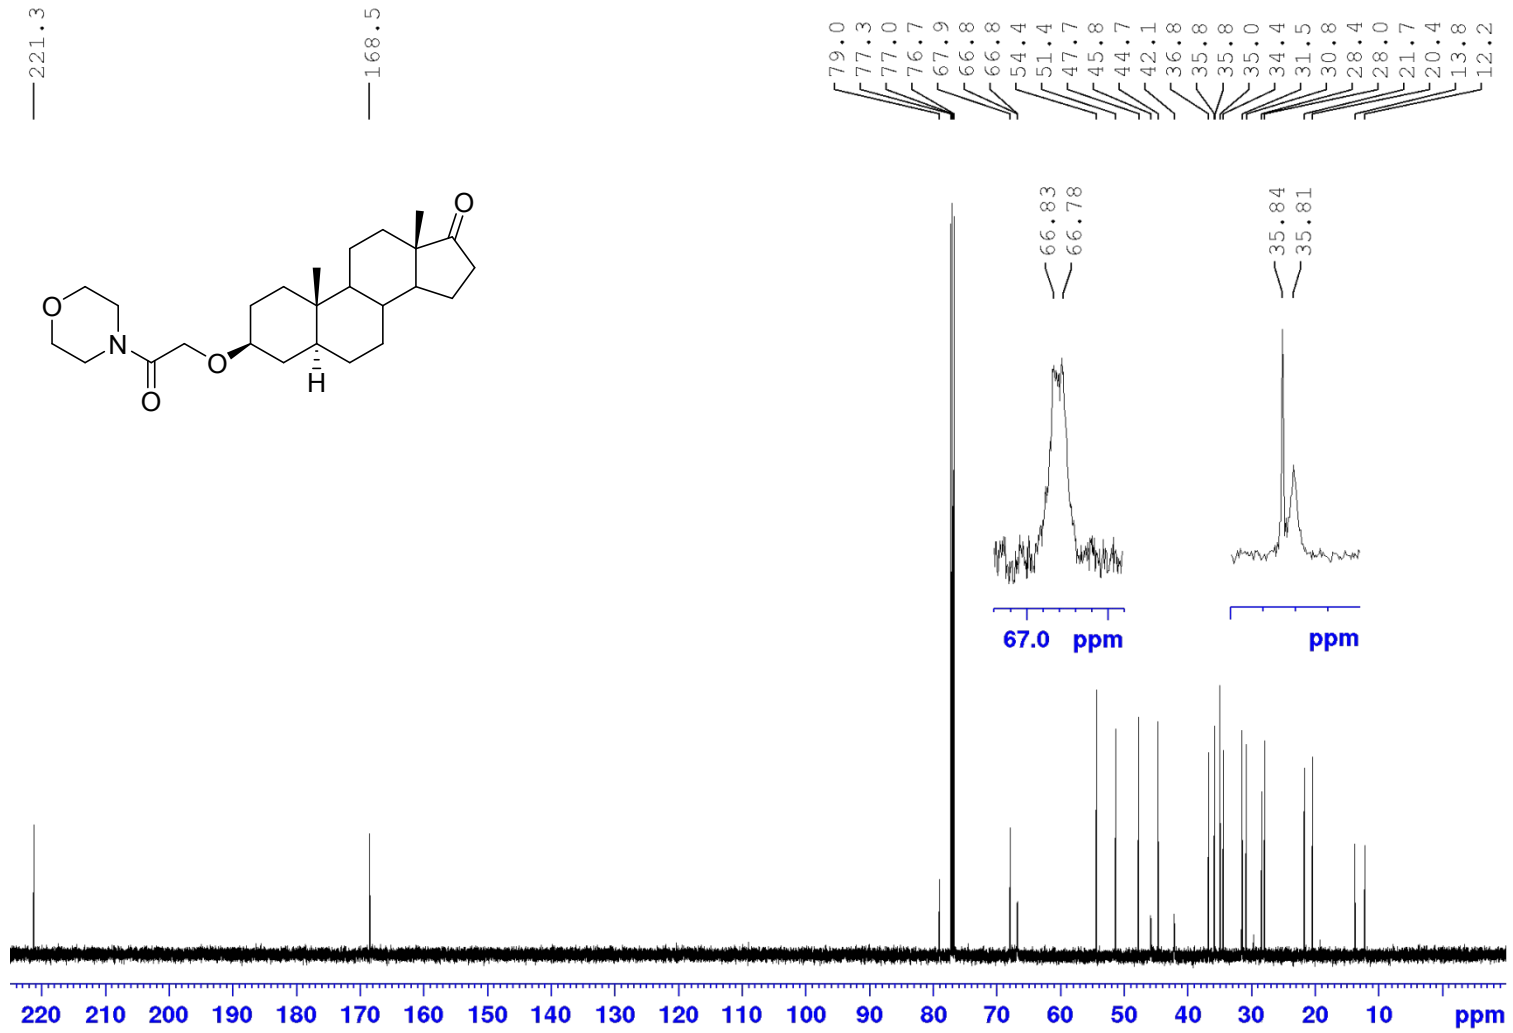

Epiandrosterone 2-(morpholinosulfonyl)ethyl ether (34) –  $^1\text{H}$  –  $\text{CDCl}_3$  – 500 MHz

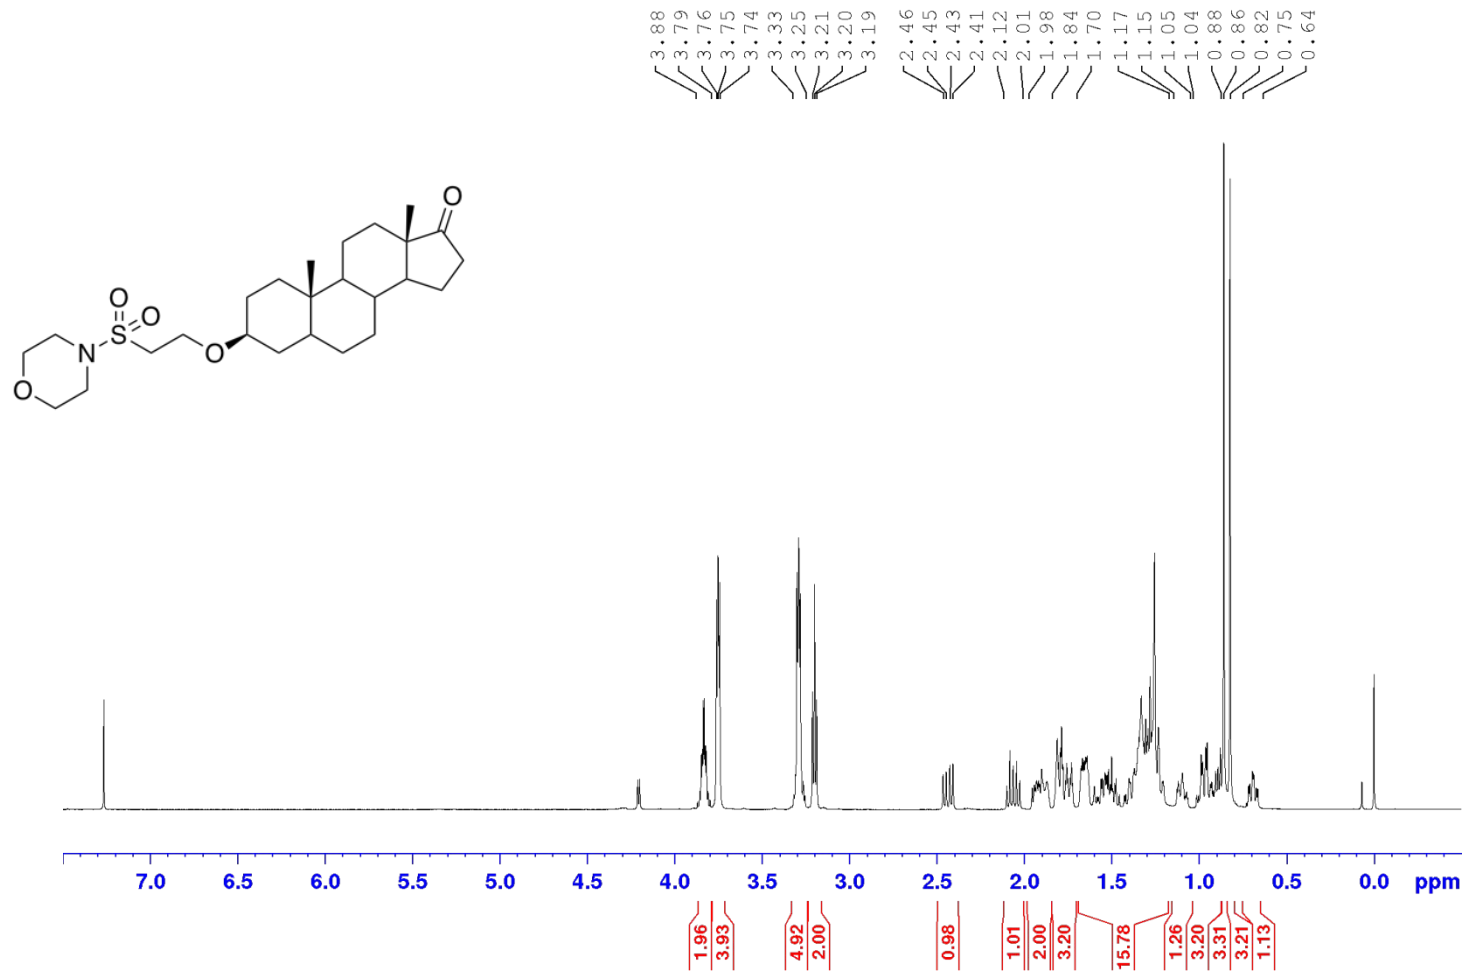

Epiandrosterone 2-(morpholinosulfonyl)ethyl ether (34) –  $^{13}\text{C}$  –  $\text{CDCl}_3$  – 125 MHz

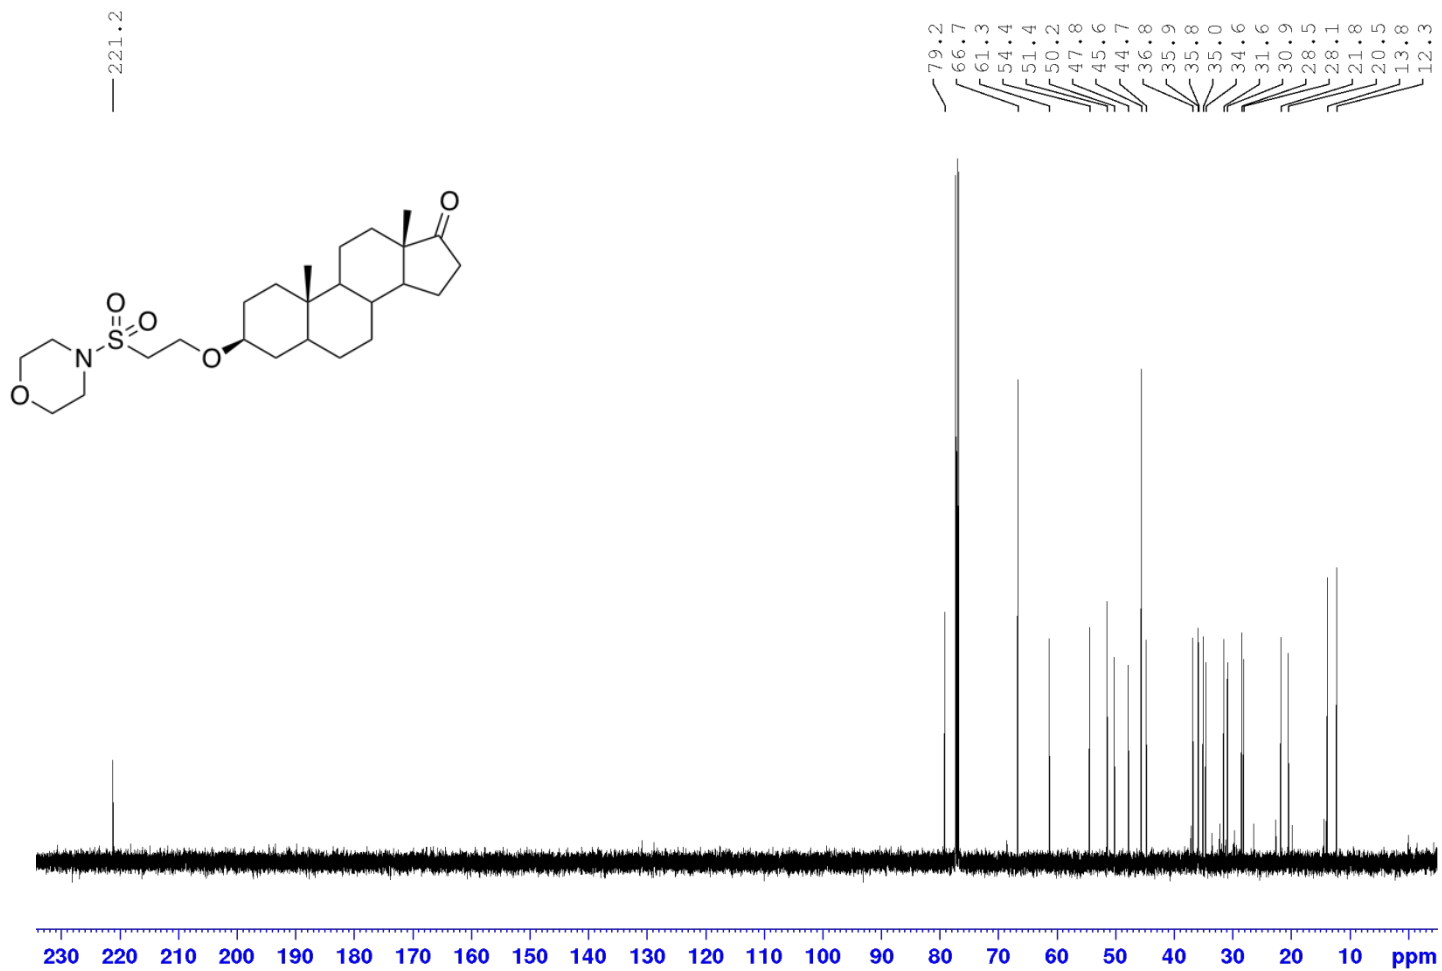

2-Bromo-1-morpholinoethan-1-one (35) –  $^1\text{H}$  –  $\text{CDCl}_3$  – 500 MHz

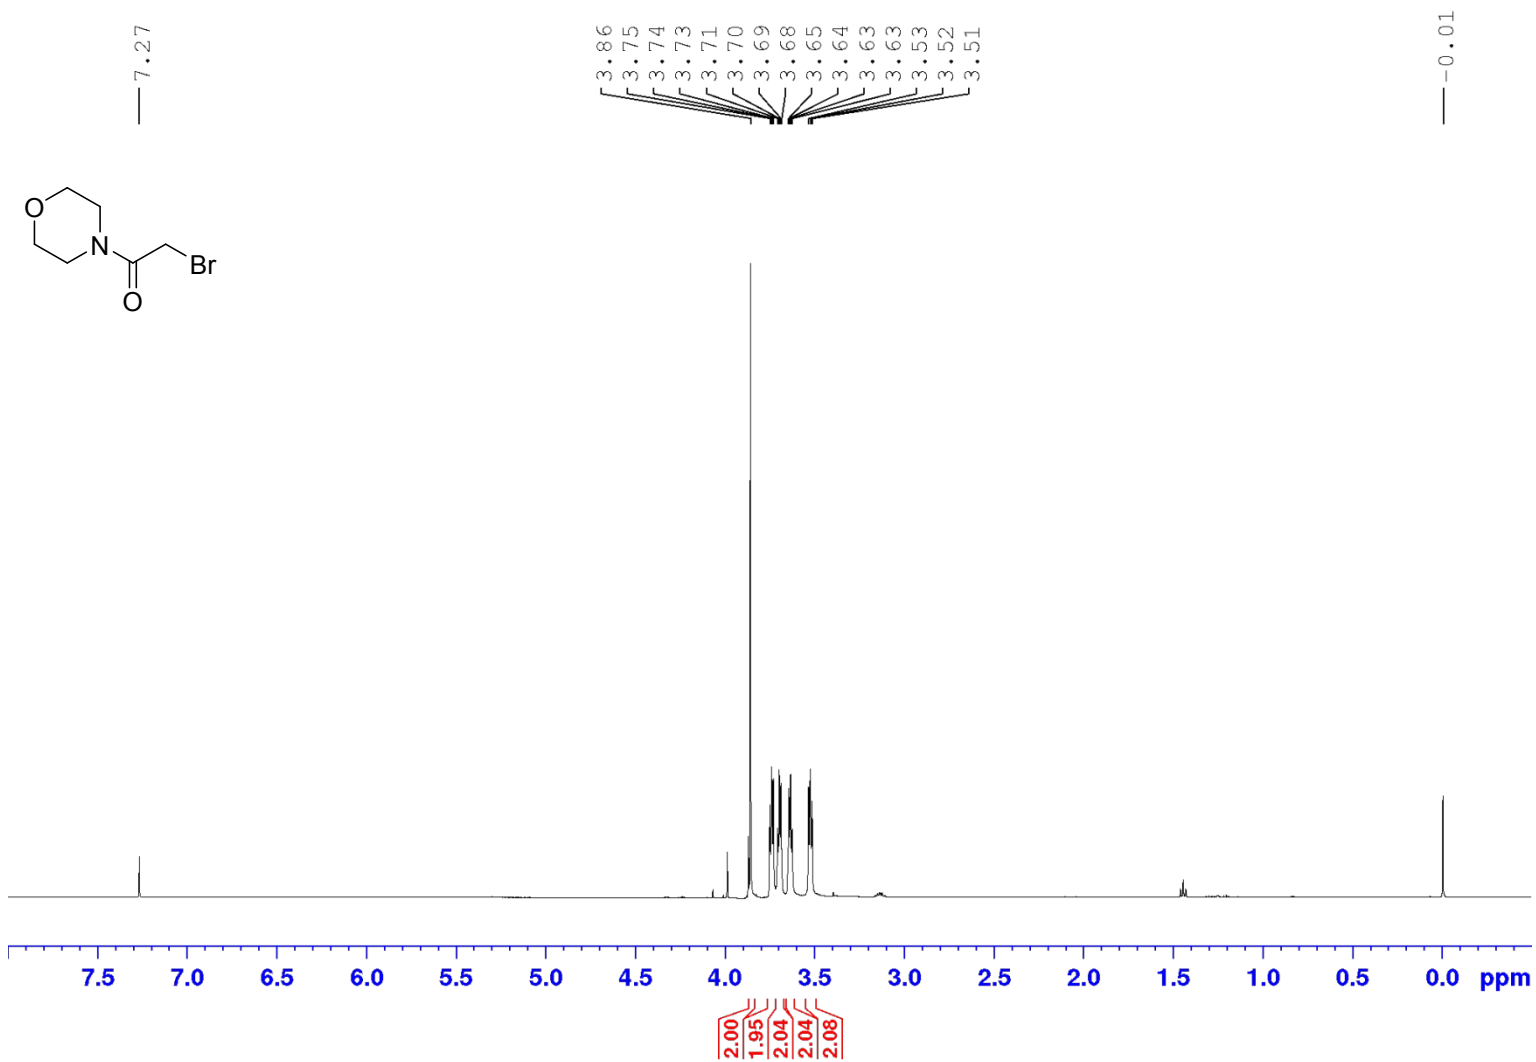

2-Bromo-1-morpholinoethan-1-one (35) –  $^{13}\text{C}$  –  $\text{CDCl}_3$  – 125 MHz

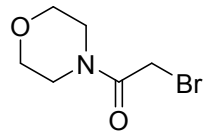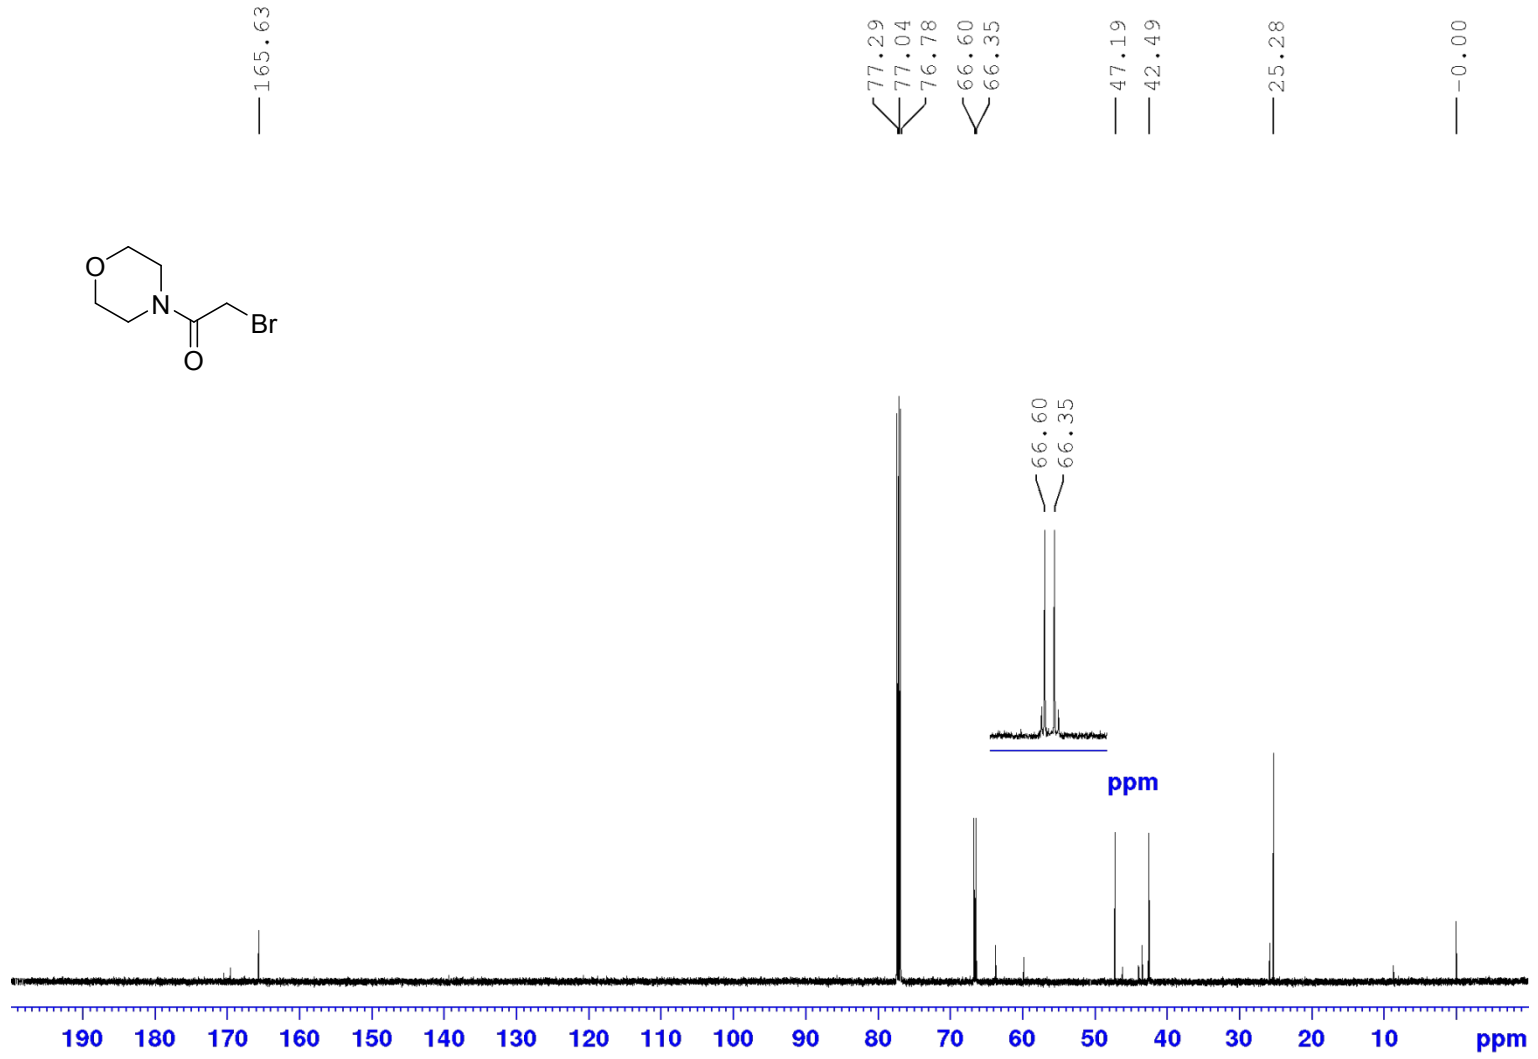

4-(Vinylsulfonyl)morpholine (36) –  $^1\text{H}$  –  $\text{CDCl}_3$  – 500 MHz

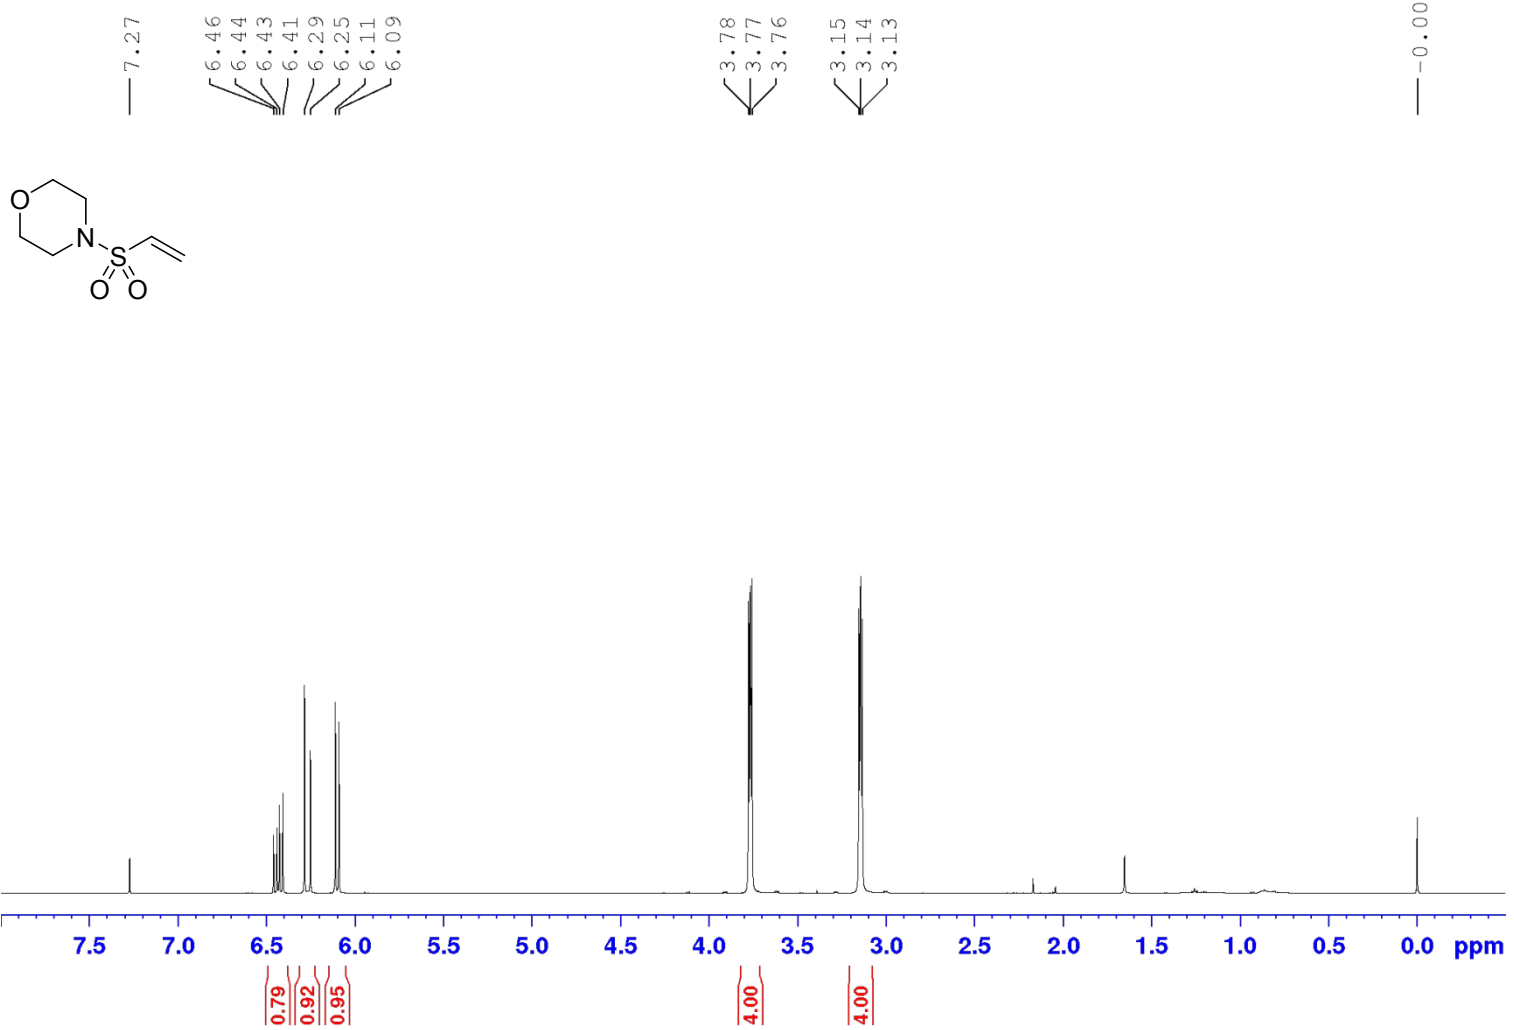

4-(Vinylsulfonyl)morpholine (36) –  $^{13}\text{C}$  –  $\text{CDCl}_3$  – 125 MHz

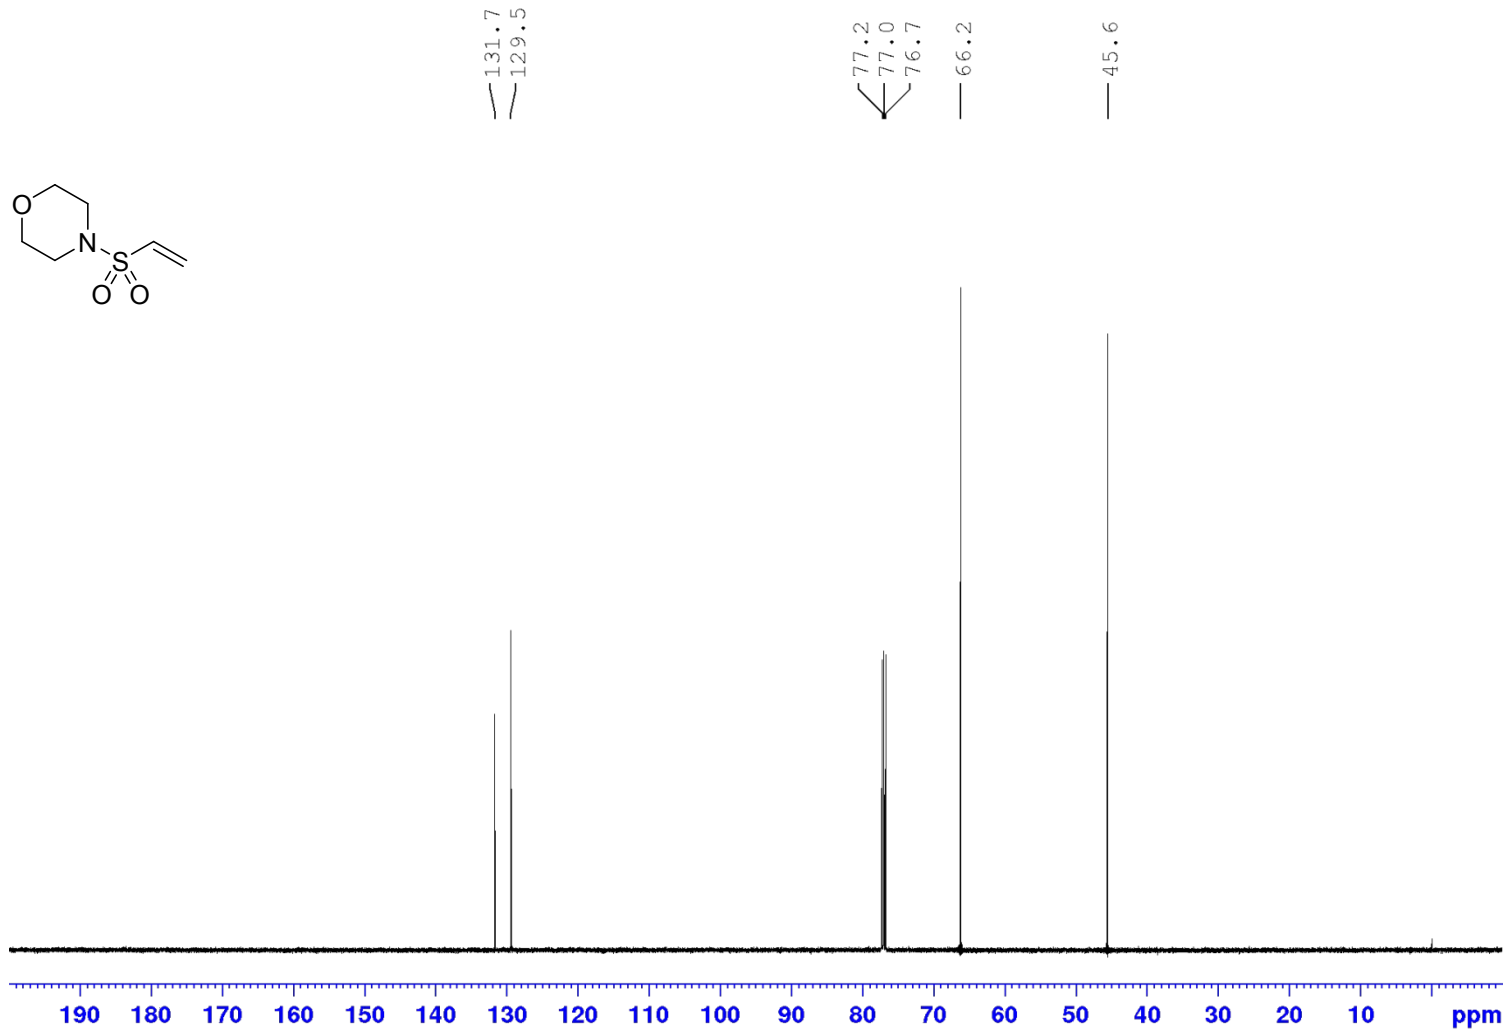

Epiandrosterone 17-acetal 2-morpholino-2-oxoethoxy ether (37) –  $^1\text{H}$  –  $\text{CDCl}_3$  – 500 MHz

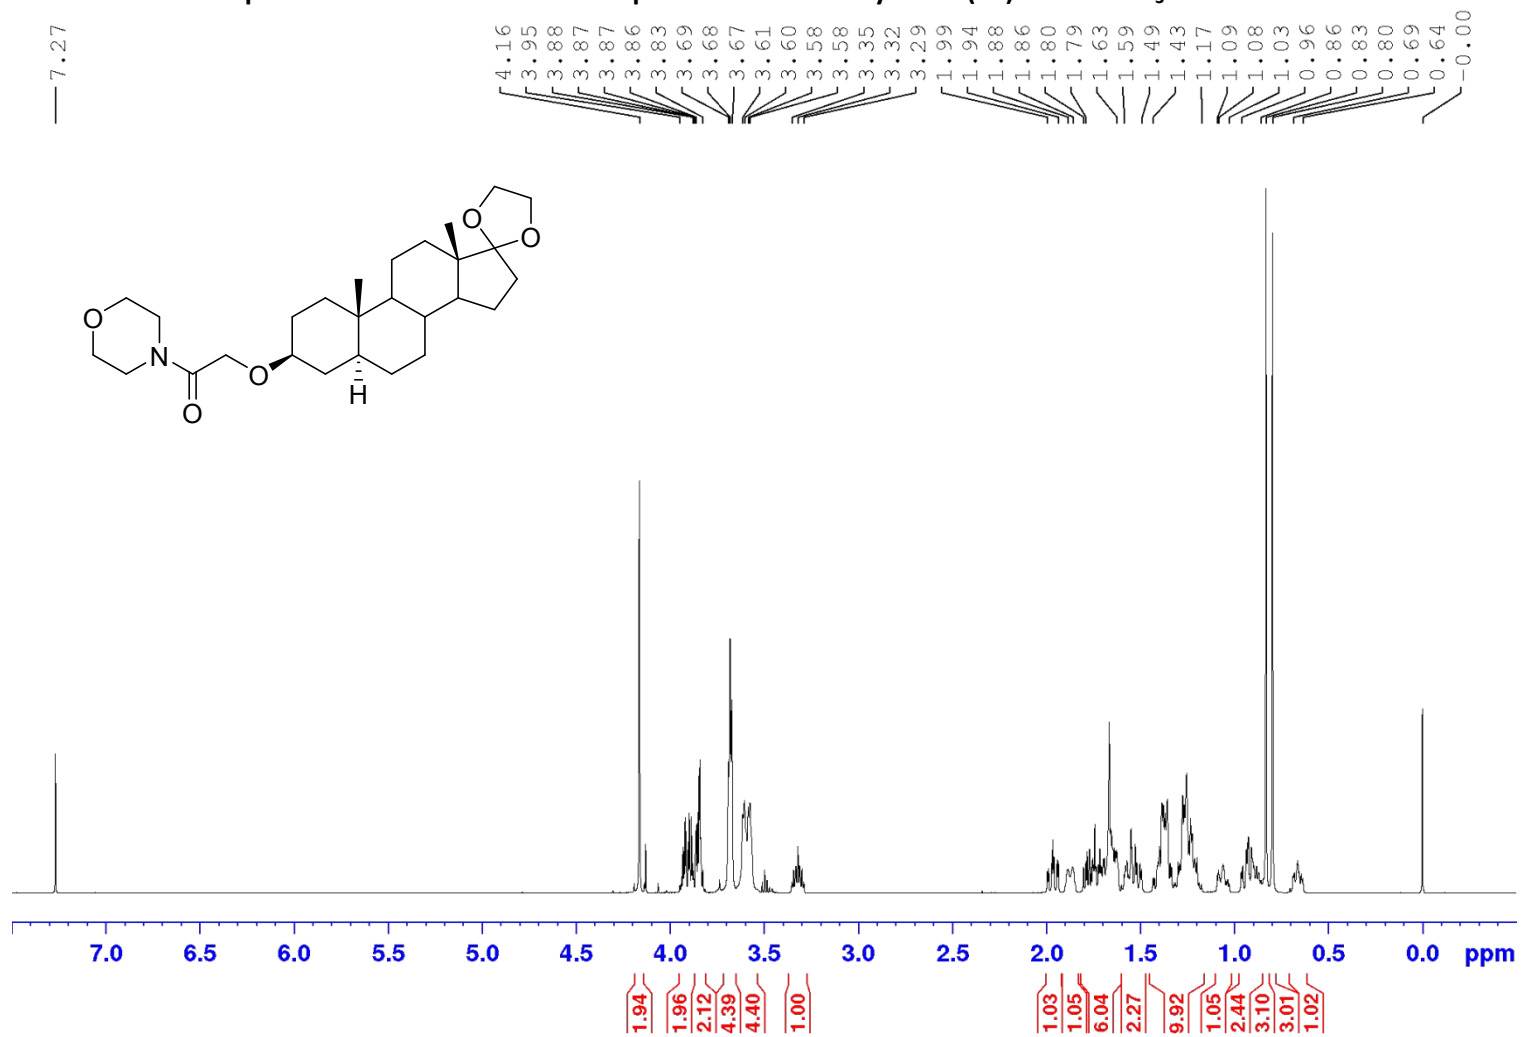



Epiandrosterone 17-acetal 2-morpholino-2-oxoethoxy ether (37) –  $^{13}\text{C}$  –  $\text{CDCl}_3$  – 125 MHz

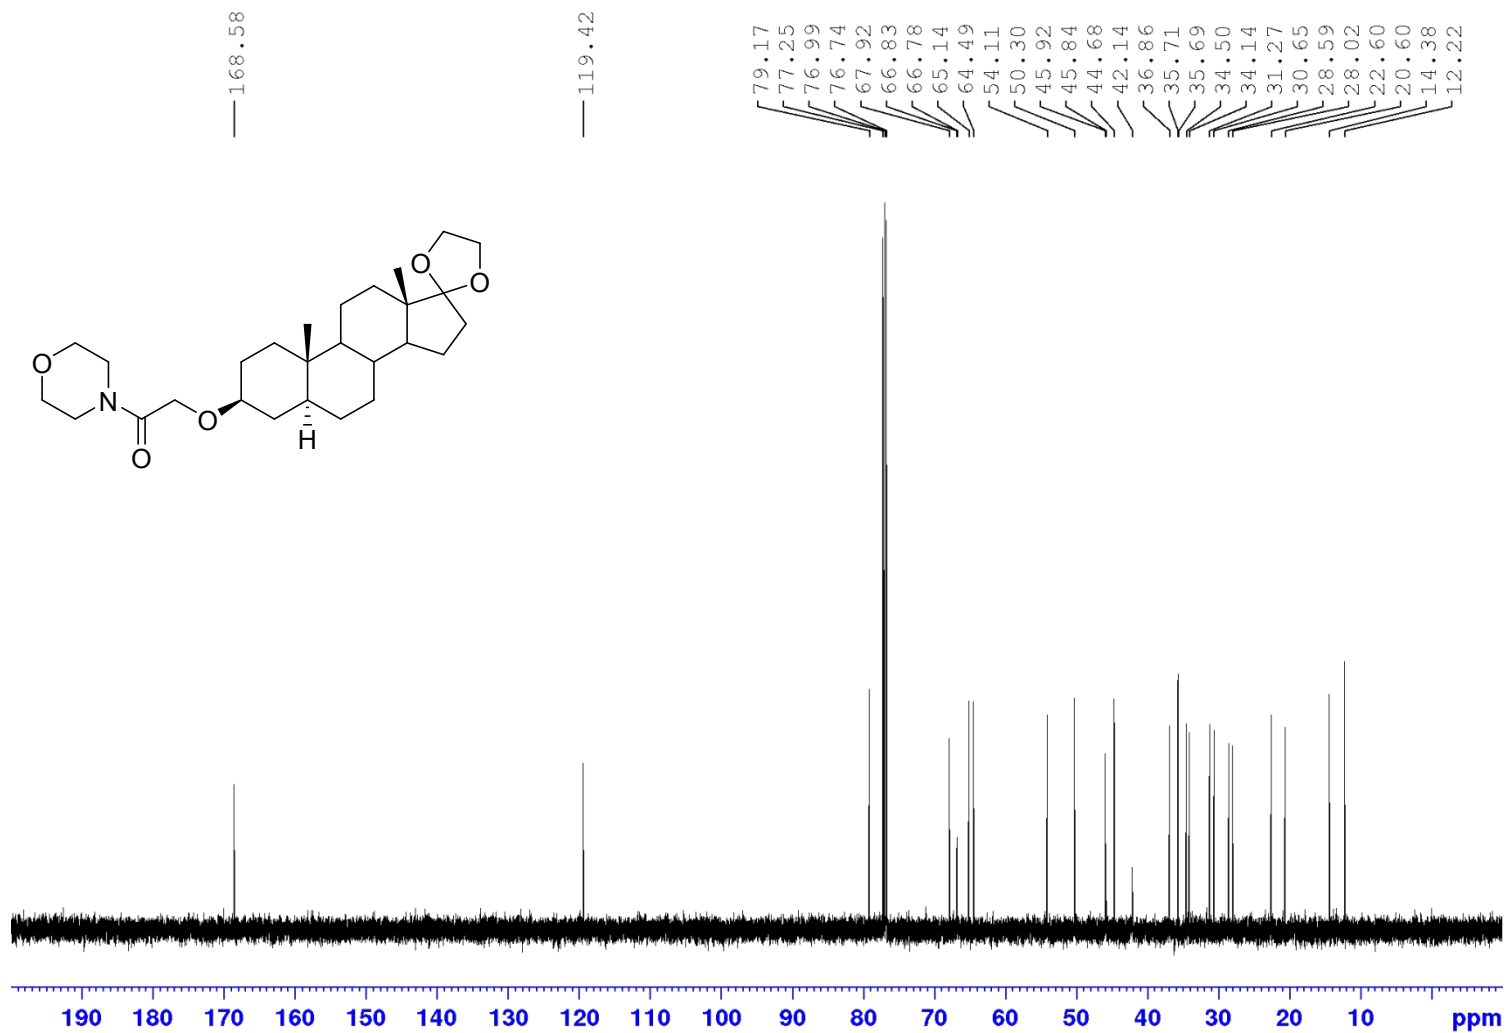

Epiandrosterone 17-acetal 2-(morphinosulfonyl)ethyl ether (38) –  $^1\text{H}$  –  $\text{CDCl}_3$  – 500 MHz

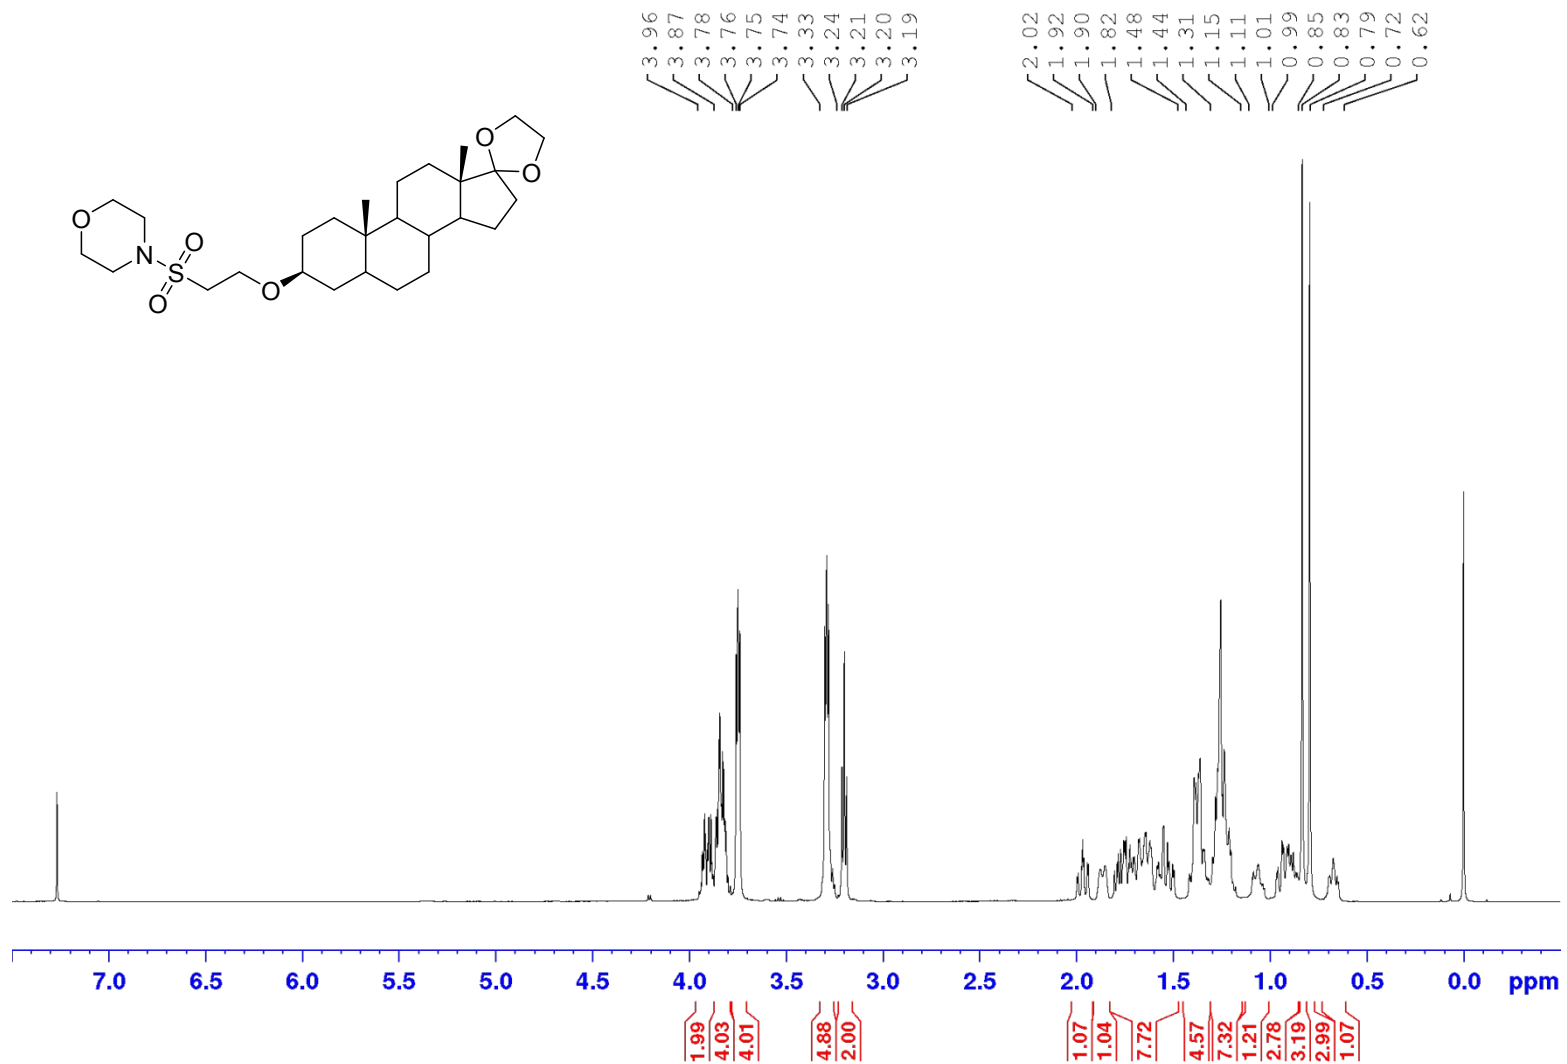

Epiandrosterone 17-acetal 2-(morpholinosulfonyl)ethyl ether (38) –  $^{13}\text{C}$  –  $\text{CDCl}_3$  – 125 MHz

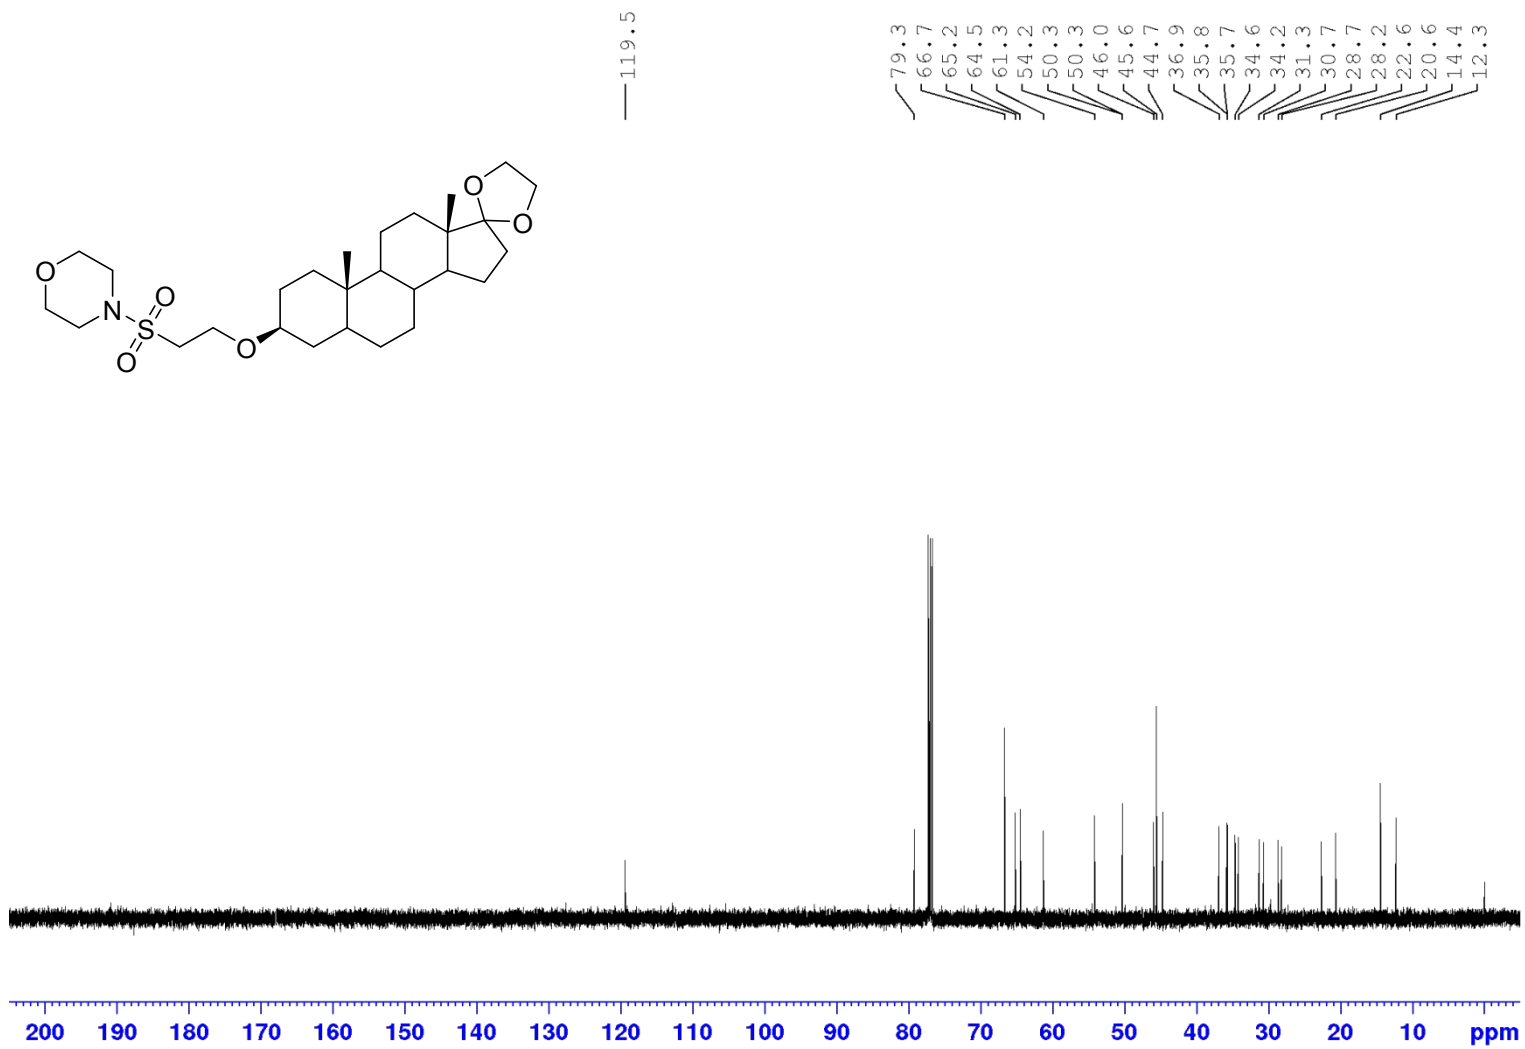

16 $\alpha$ -Bromoepiandrosterone 2-morpholino-2-oxoethoxy ether (39) –  $^1\text{H}$  –  $\text{CDCl}_3$  – 500 MHz

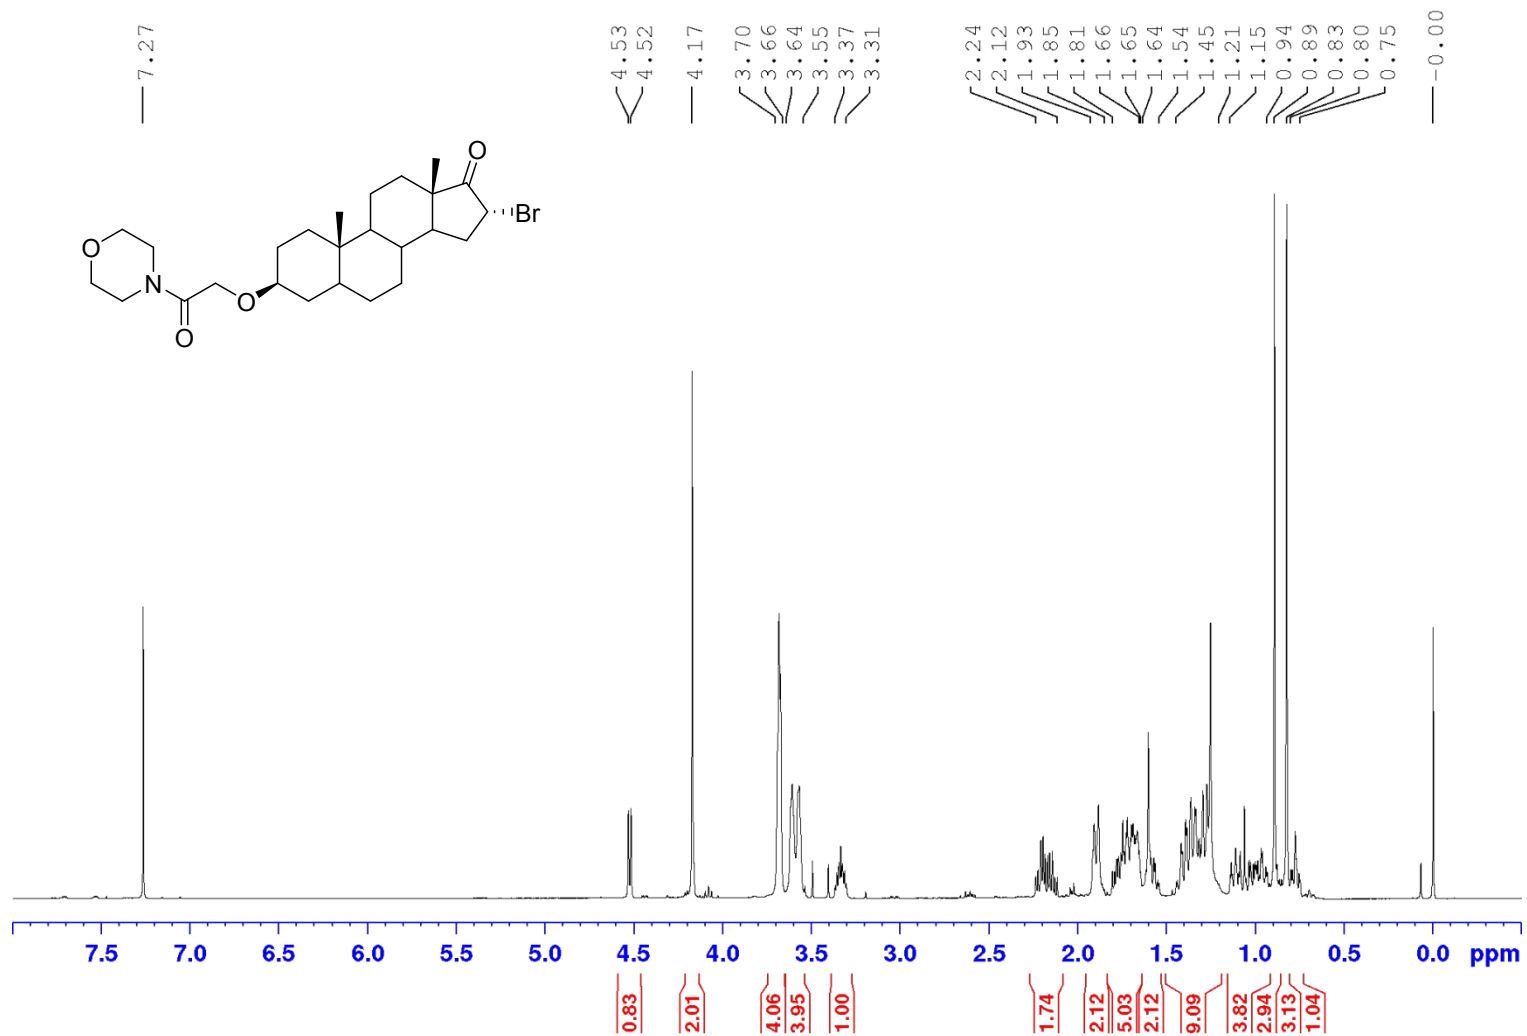

16 $\alpha$ -Bromoepiandrosterone 2-morpholino-2-oxoethoxy ether (39) –  $^{13}\text{C}$  –  $\text{CDCl}_3$  – 125 MHz

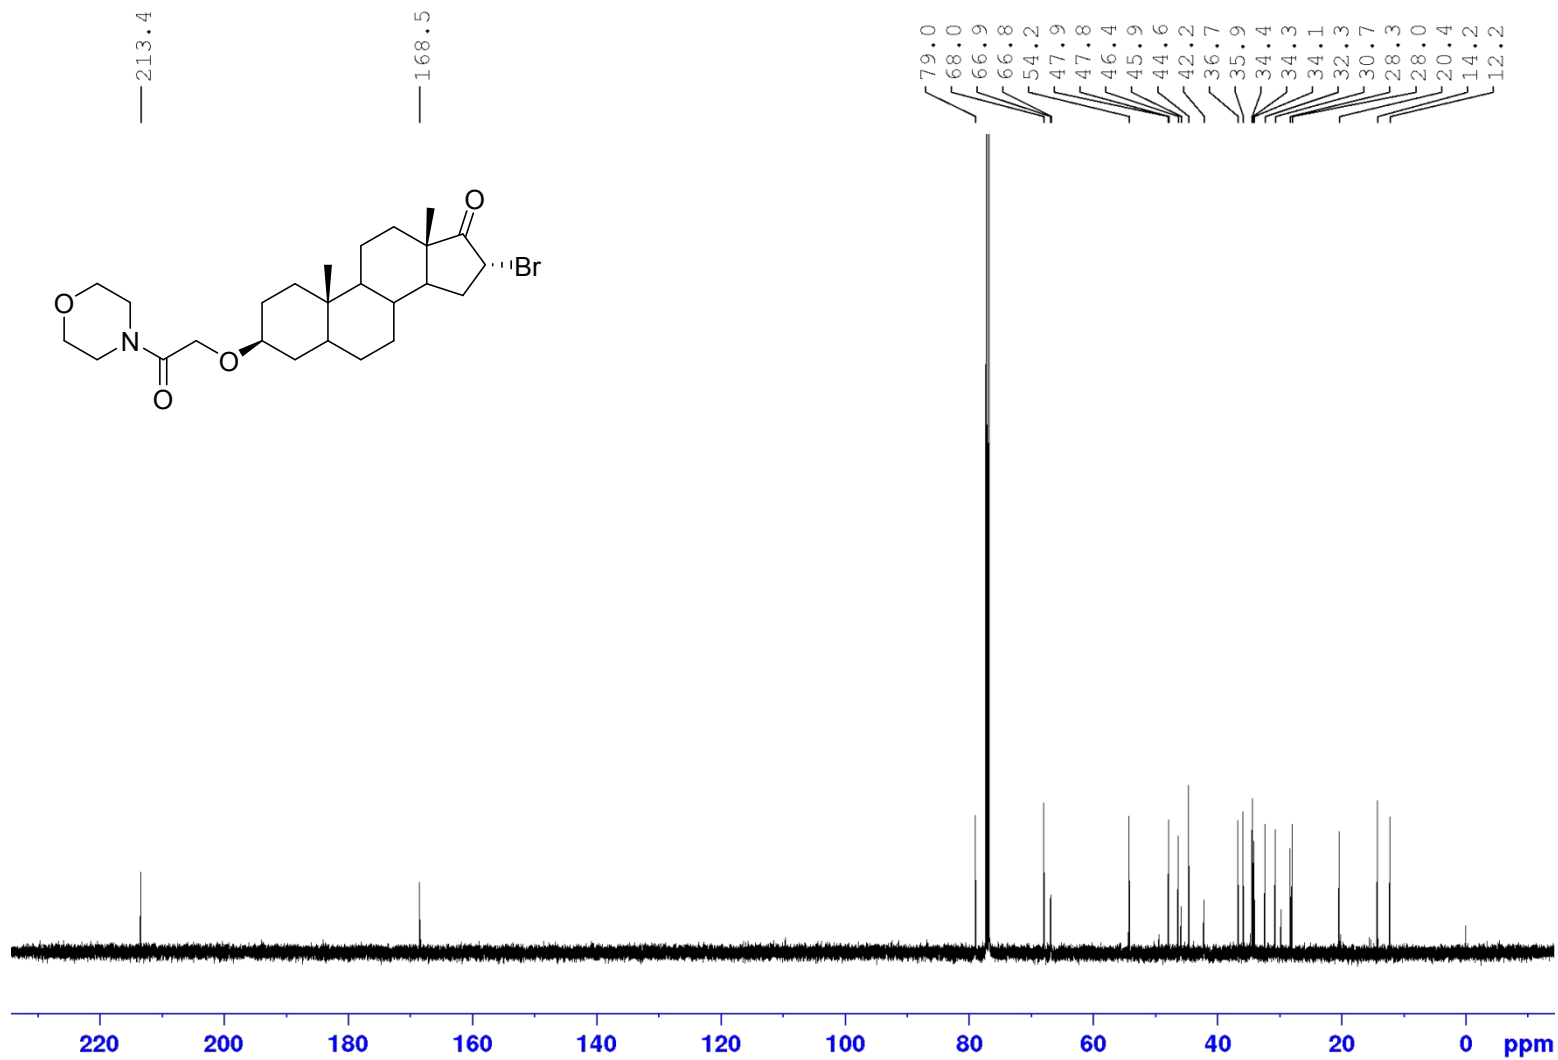

16 $\alpha$ -Bromoepiandrosterone 2-(morpholinosulfonyl)ethyl ether (40) –  $^1\text{H}$  –  $\text{CDCl}_3$  – 500 MHz

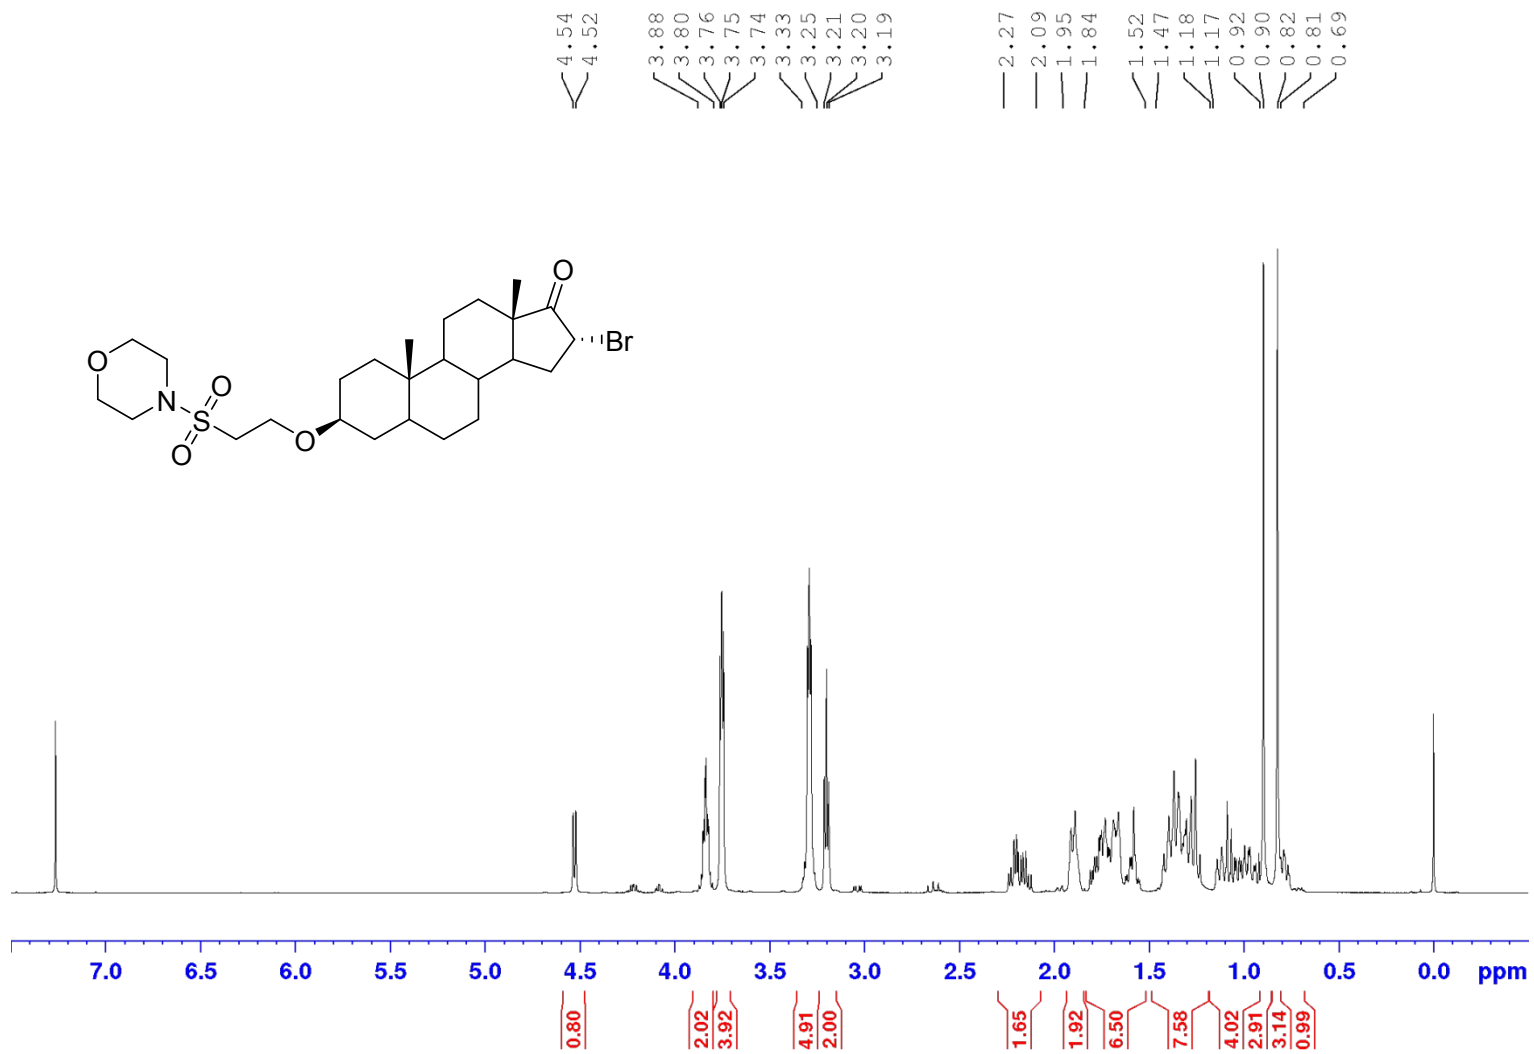

16 $\alpha$ -Bromoepiandrosterone 2-(morpholinosulfonyl)ethyl ether (40) –  $^{13}\text{C}$  –  $\text{CDCl}_3$  – 125 MHz

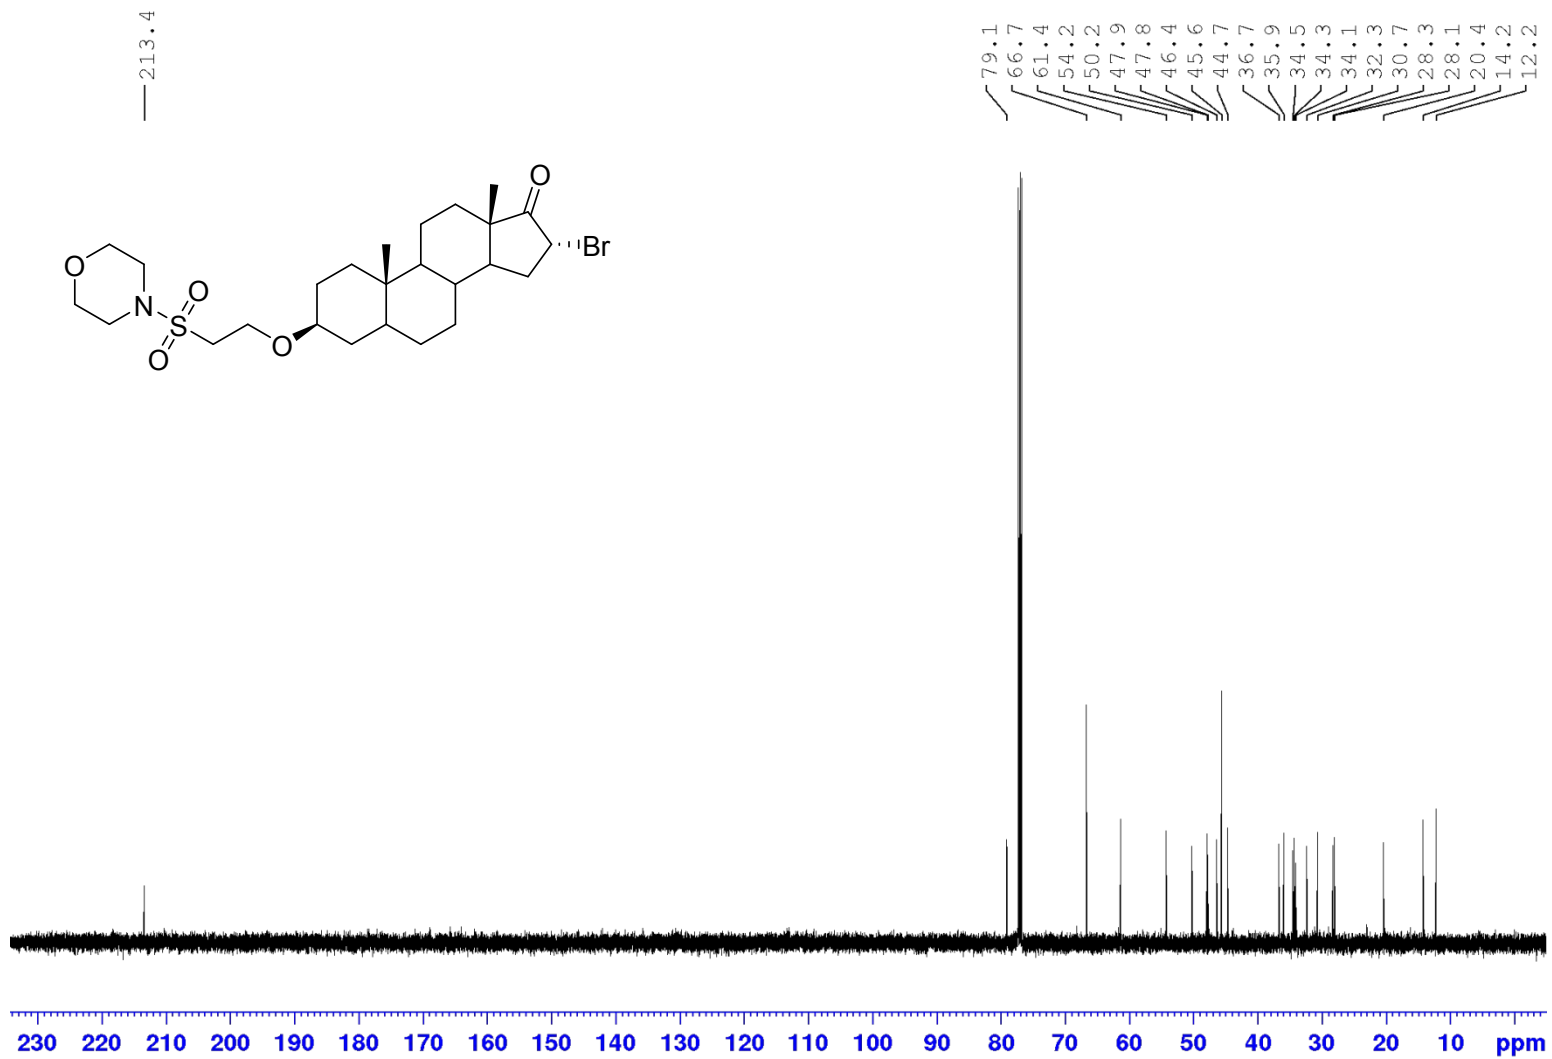

**(R)-Oxiran-2-ylmethyl 4-methylbenzenesulfonate (41) –  $^1\text{H}$  –  $\text{CDCl}_3$  – 500 MHz**

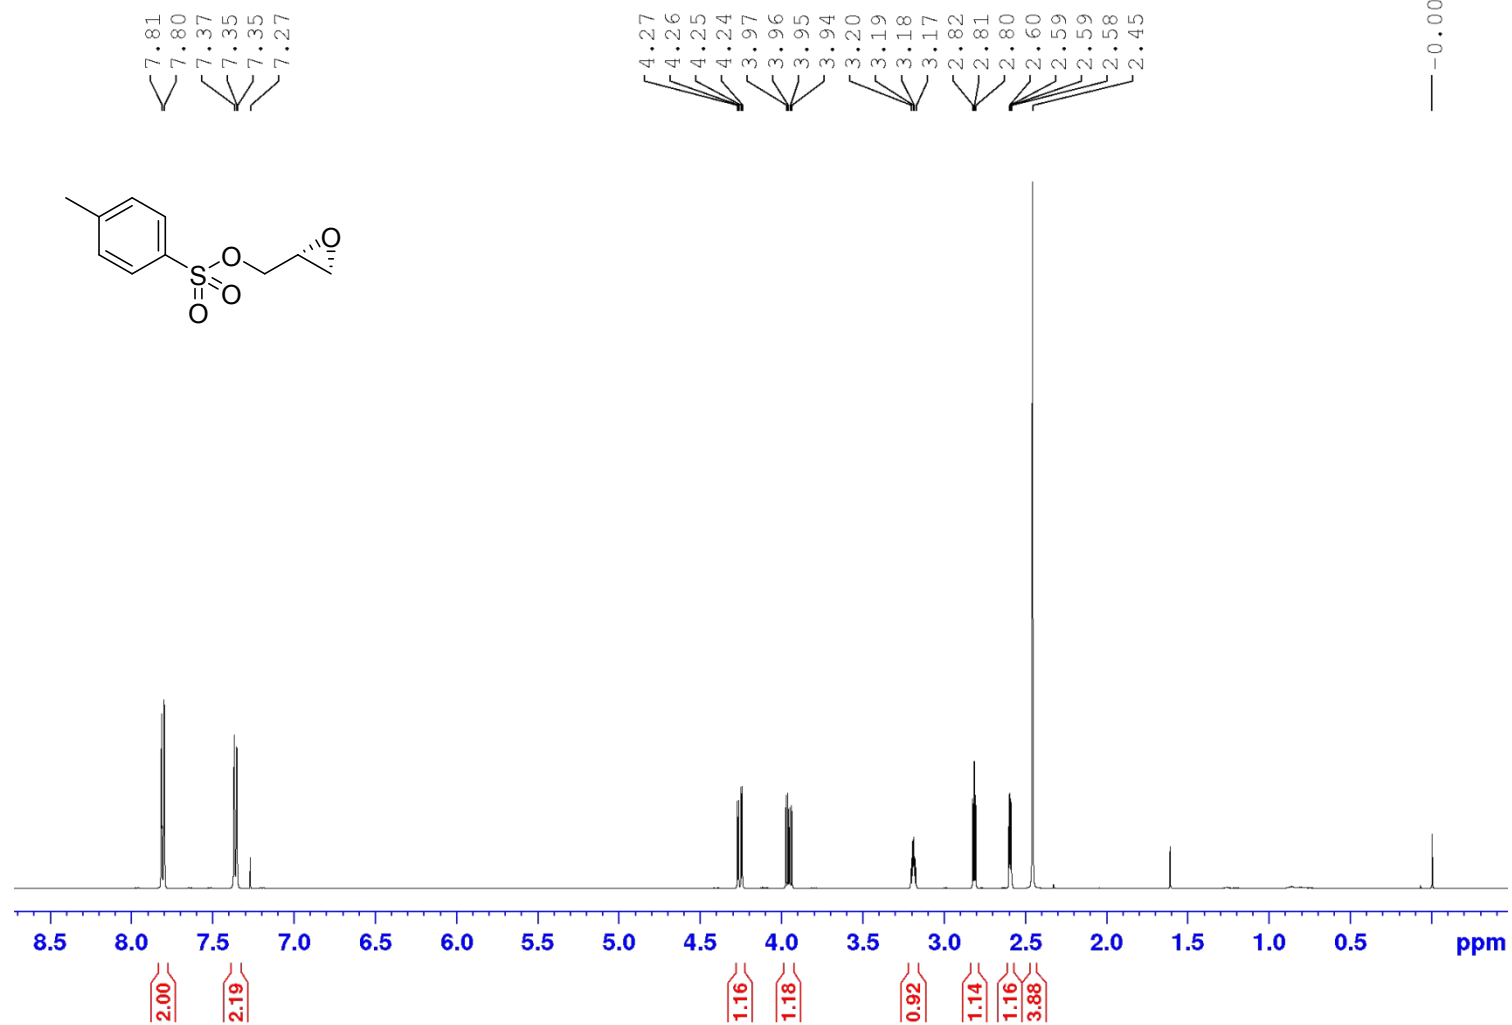

— — 0.00



**(R)-Oxiran-2-ylmethyl 4-methylbenzenesulfonate (41) –  $^{13}\text{C}$  –  $\text{CDCl}_3$  – 125 MHz**

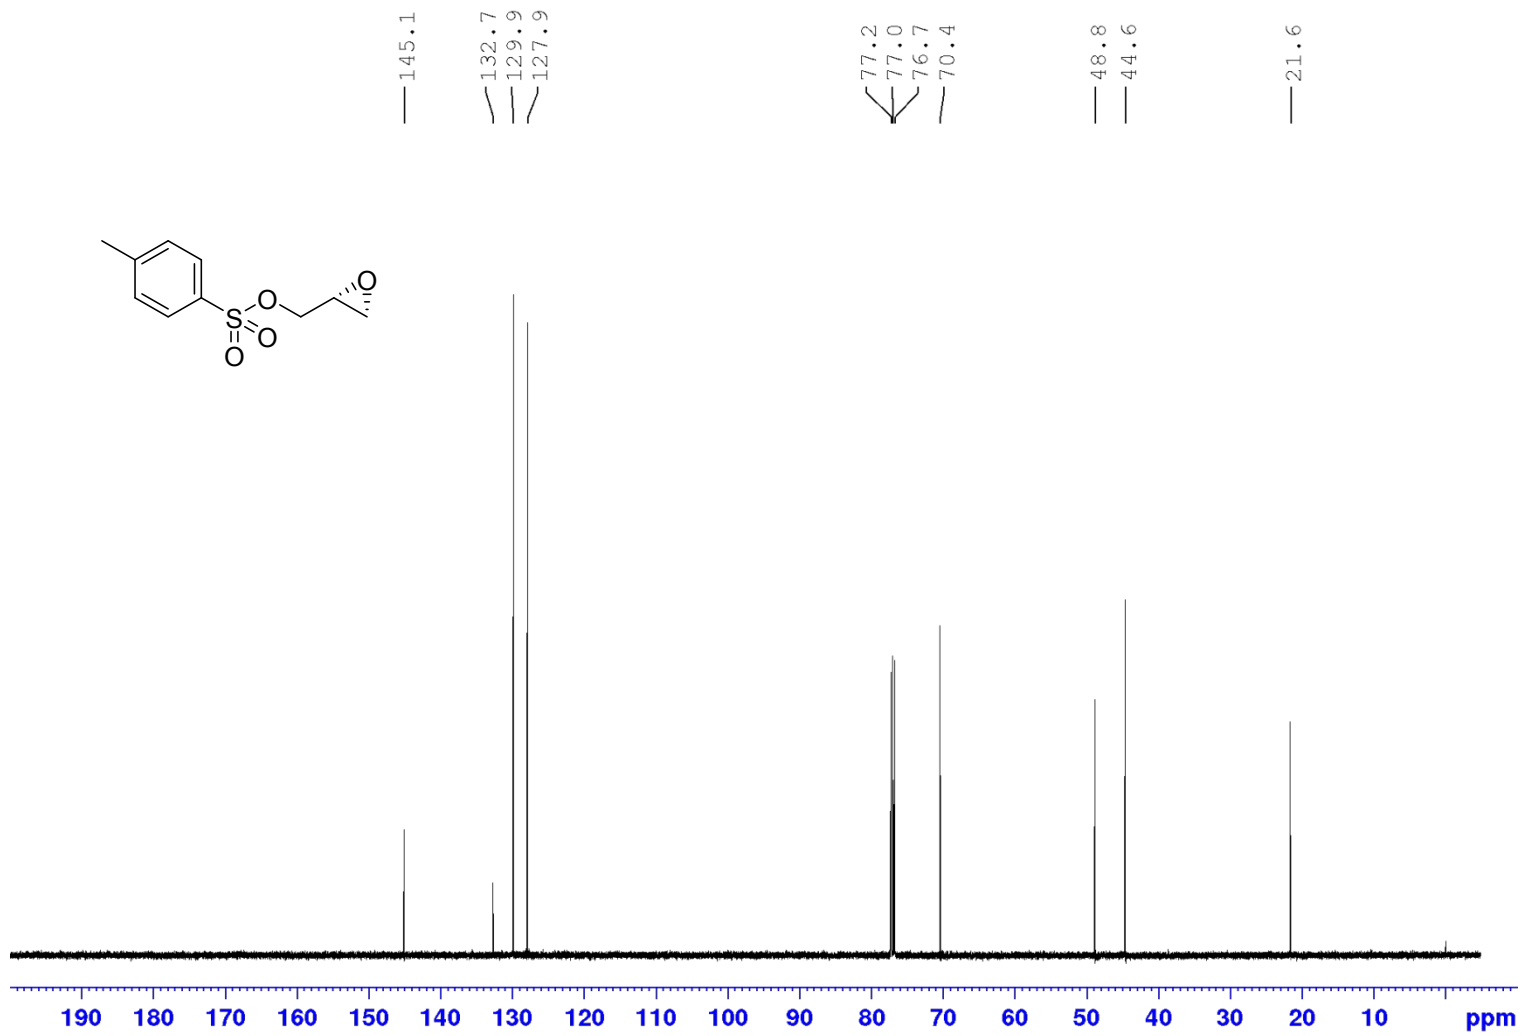

(S)-Oxiran-2-ylmethyl 4-methylbenzenesulfonate (42) –  $^1\text{H}$  –  $\text{CDCl}_3$  – 500 MHz

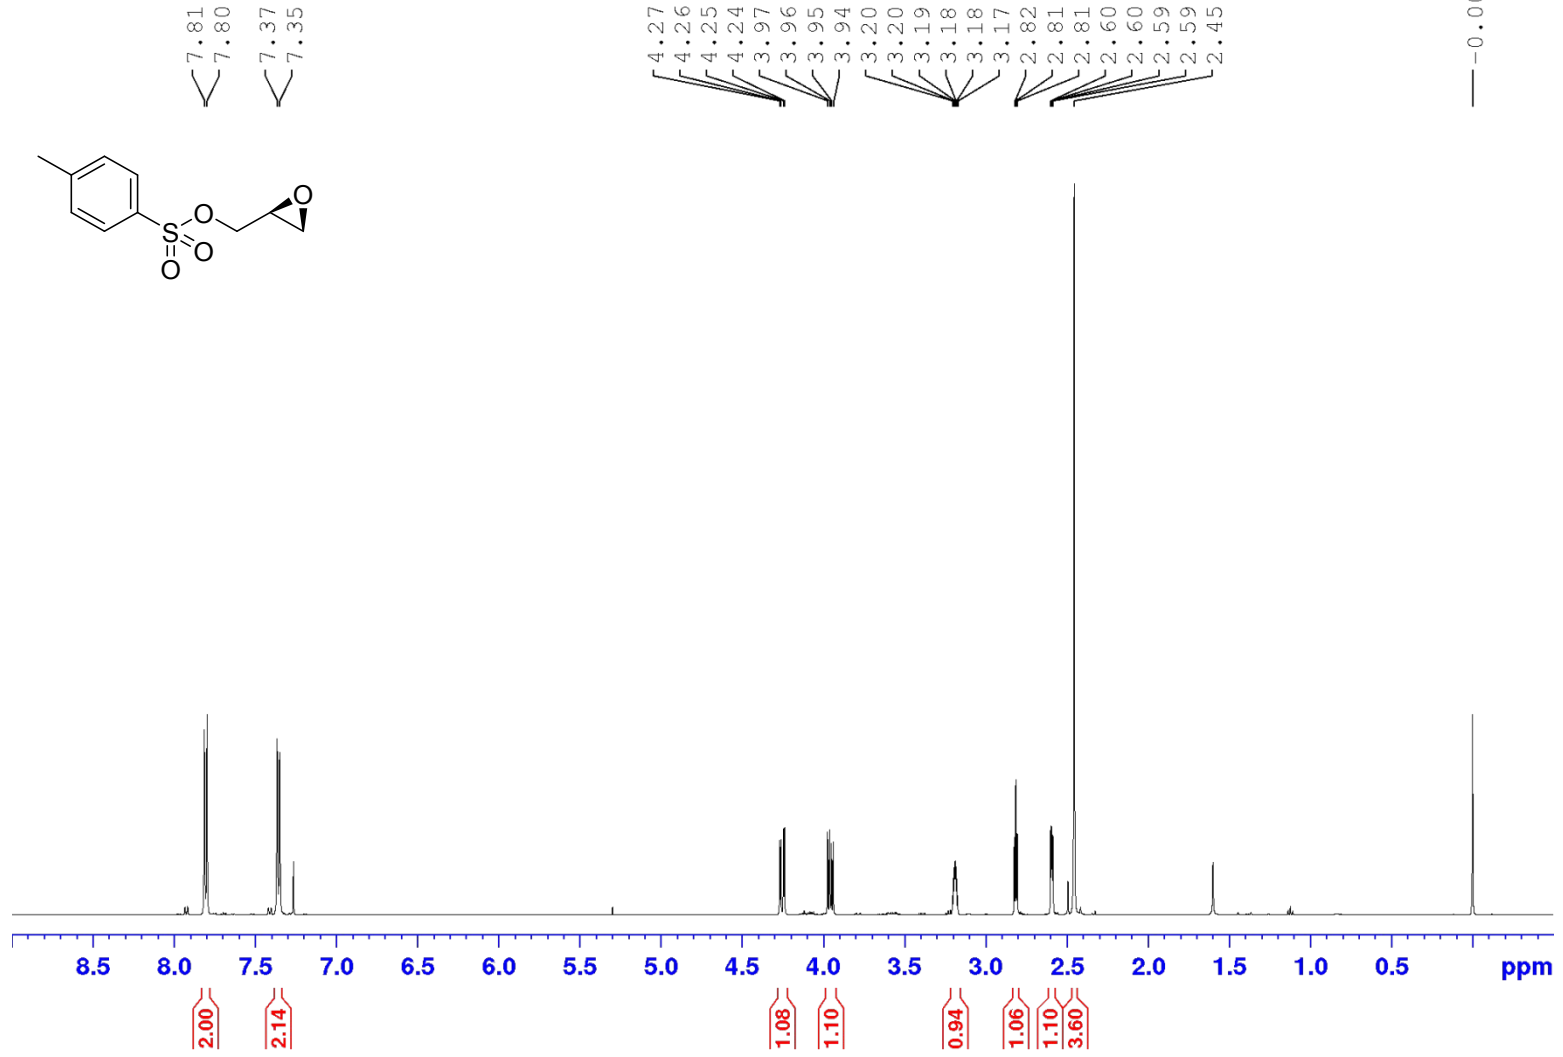

(S)-Oxiran-2-ylmethyl 4-methylbenzenesulfonate (42) –  $^{13}\text{C}$  –  $\text{CDCl}_3$  – 125 MHz

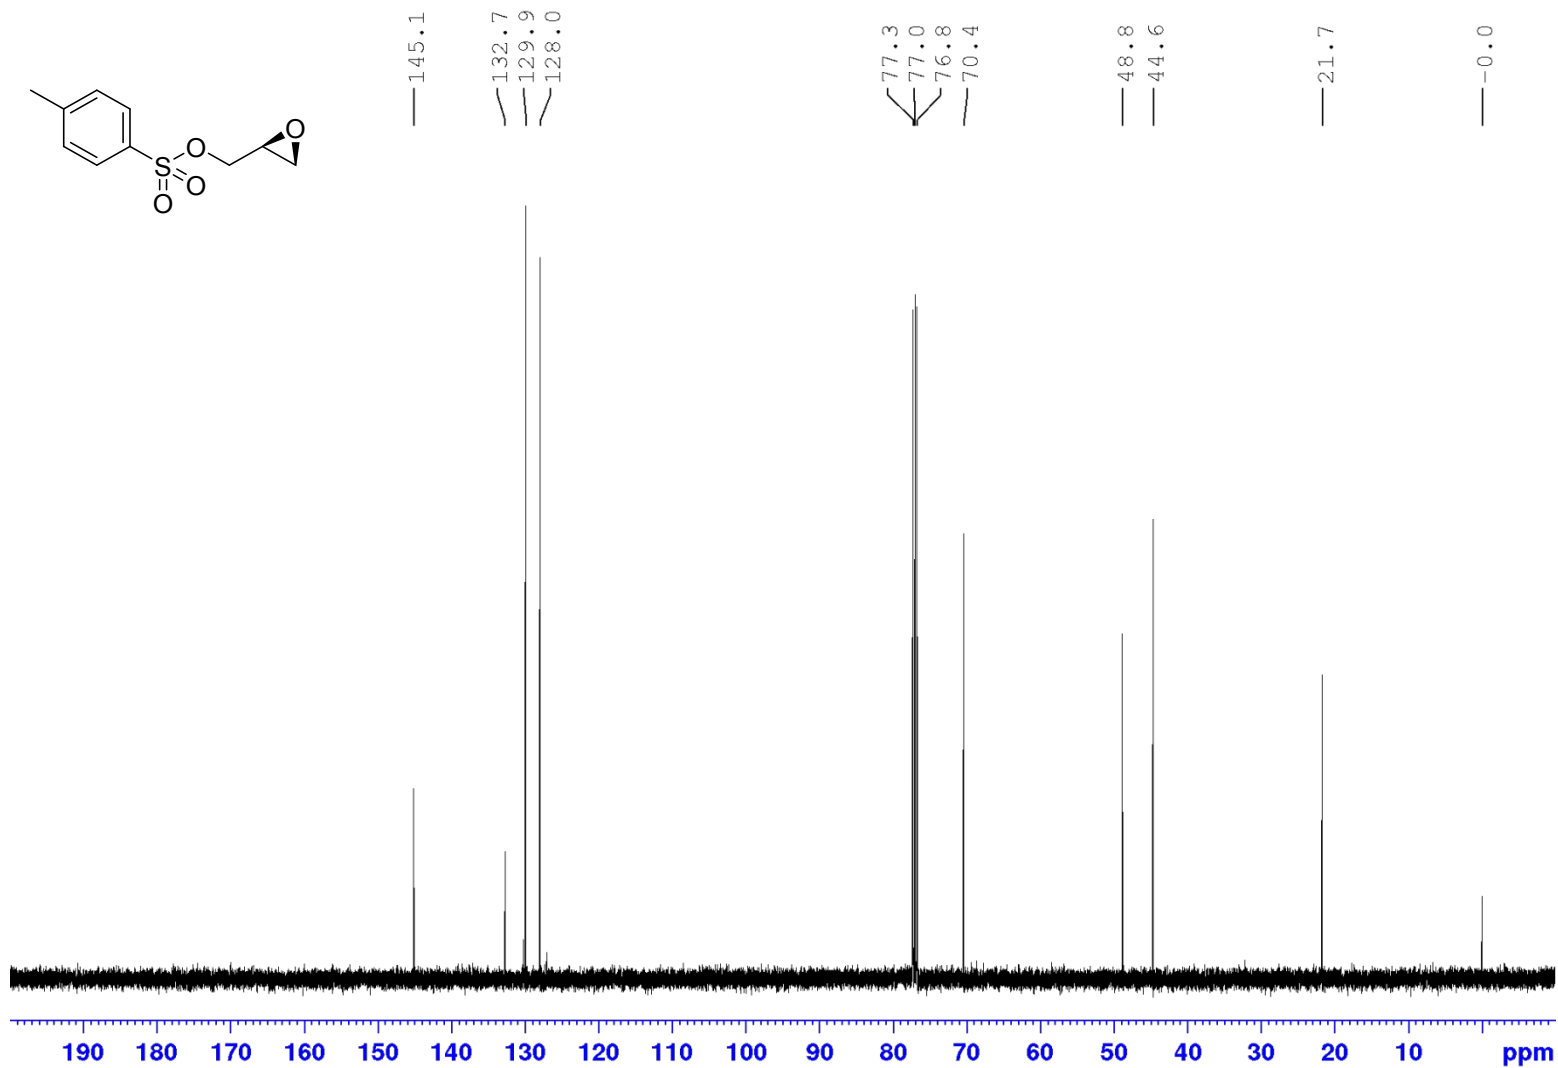

Epiandrosterone 17-acetal (*R*-oxiran-2-yl)methyl ether (45) -  $^1\text{H}$  -  $\text{CDCl}_3$  - 500 MHz

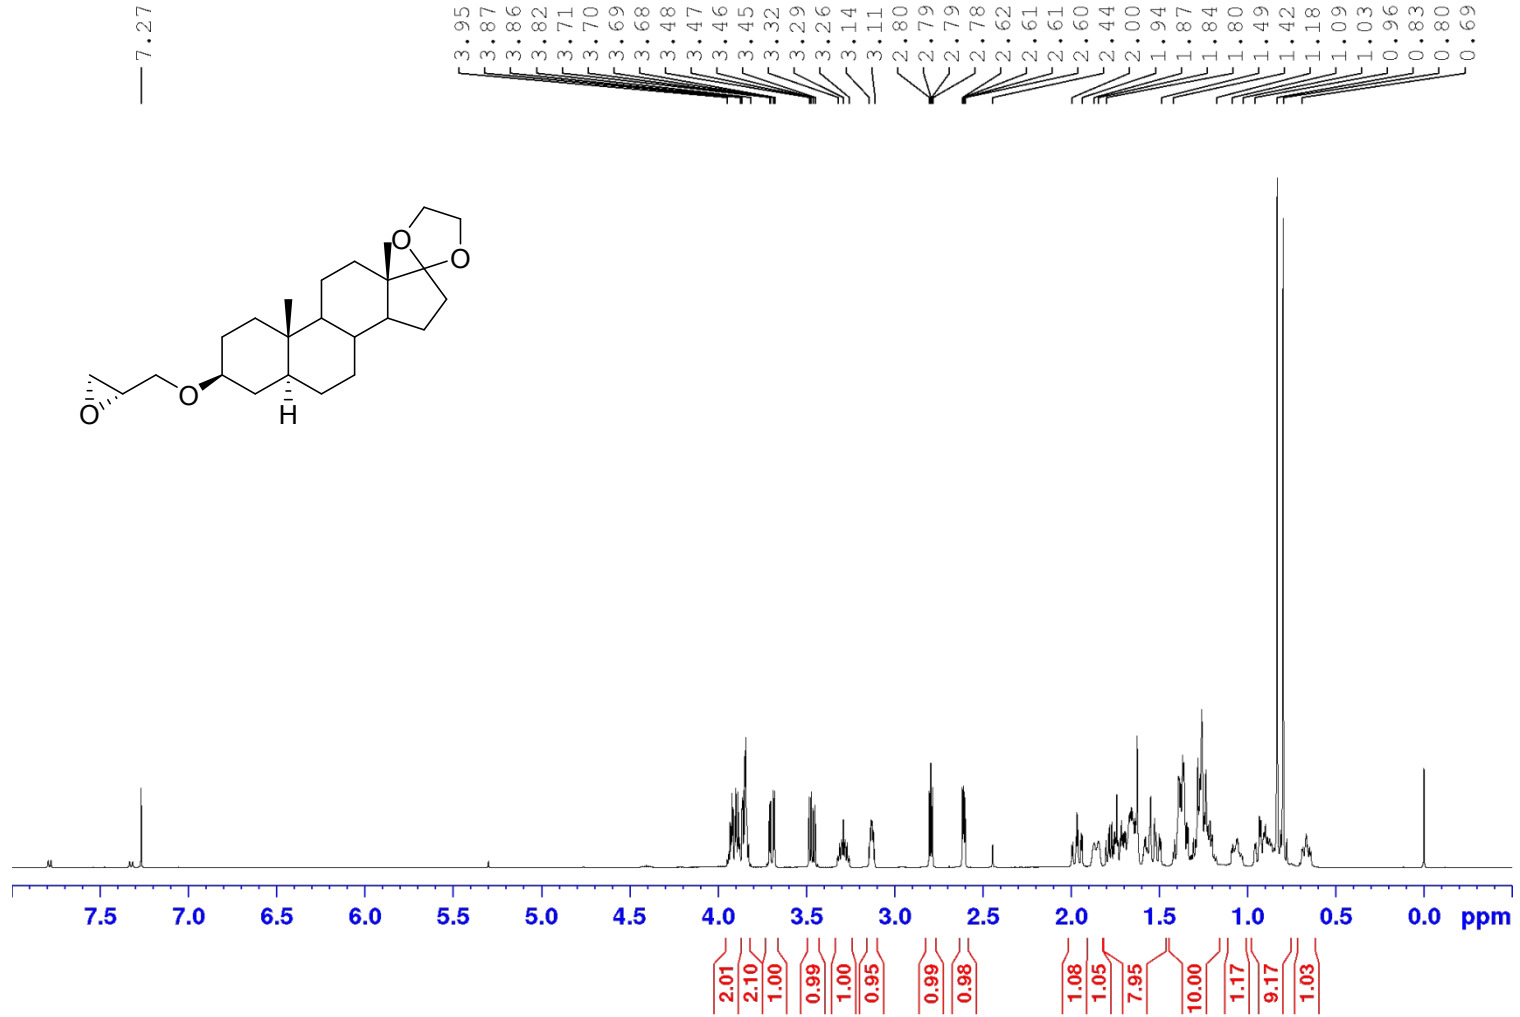

Epiandrosterone 17-acetal (*R*-oxiran-2-yl)methyl ether (45) –  $^{13}\text{C}$  –  $\text{CDCl}_3$  – 125 MHz

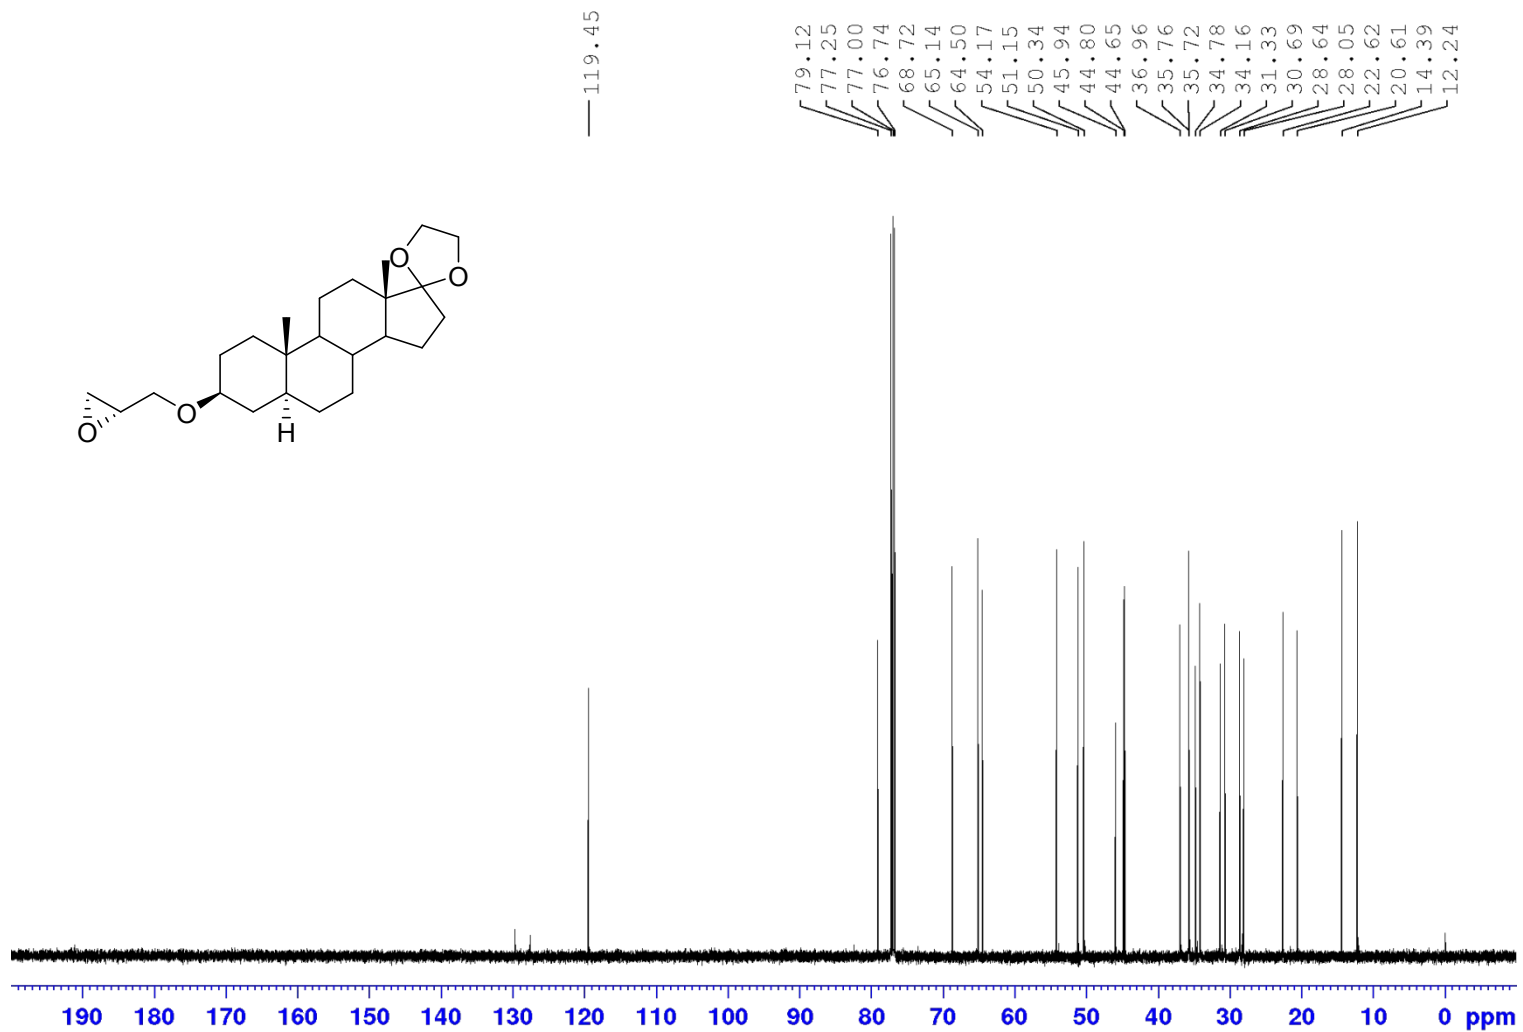

Epiandrosterone 17-acetal (*S*-oxiran-2-yl)methyl ether (46) –  $^1\text{H}$  –  $\text{CDCl}_3$  – 500 MHz

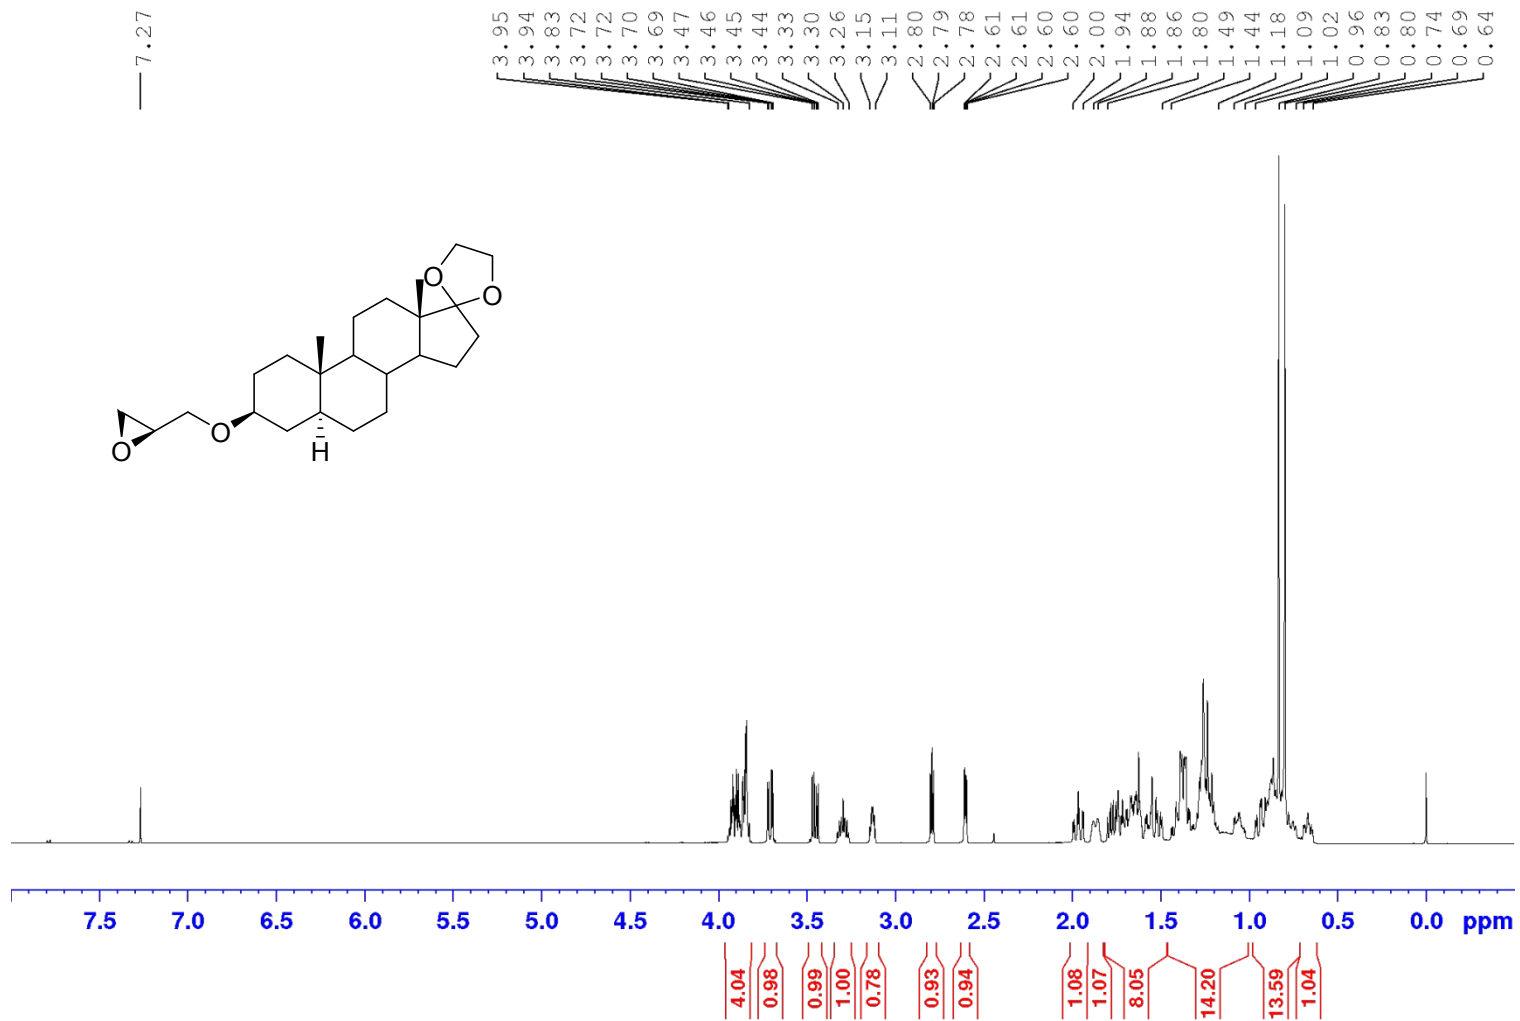

Epiandrosterone 17-acetal (*S*-oxiran-2-yl)methyl ether (46) –  $^{13}\text{C}$  –  $\text{CDCl}_3$  – 125 MHz

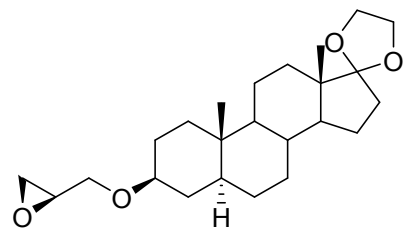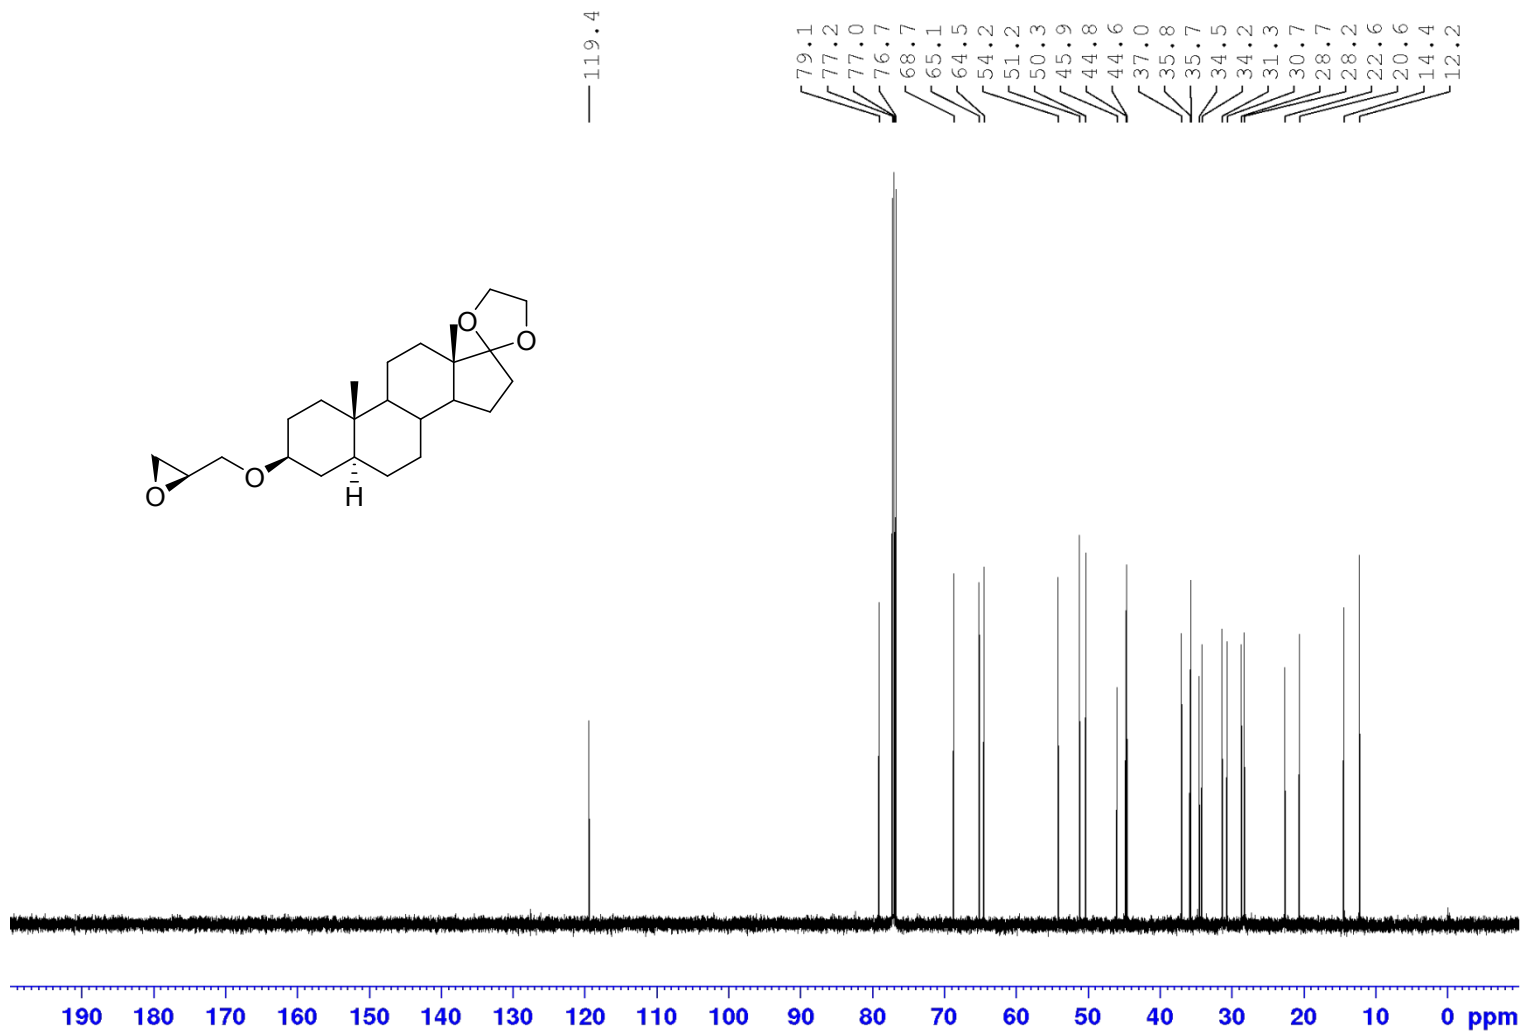

Epiandrosterone (*R*)-2-hydroxy-3-morpholinopropyl ether (47) – <sup>1</sup>H – CDCl<sub>3</sub> – 500 MHz

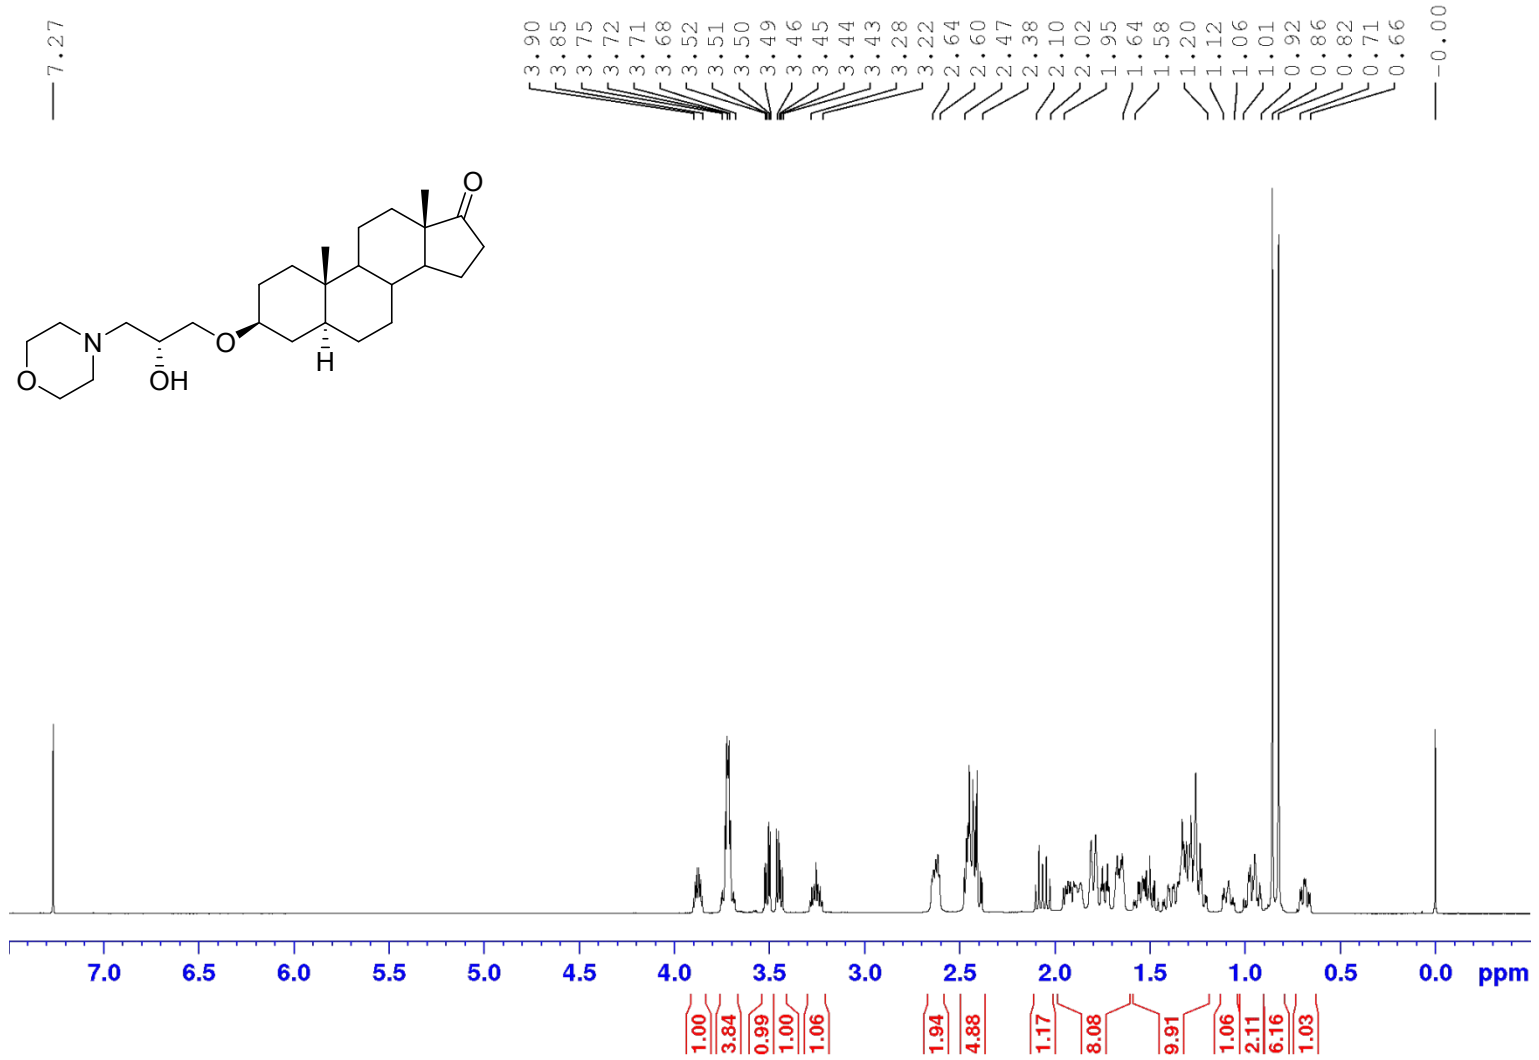



Epiandrosterone (*R*)-2-hydroxy-3-morpholinopropyl ether (47) –  $^{13}\text{C}$  –  $\text{CDCl}_3$  – 125 MHz

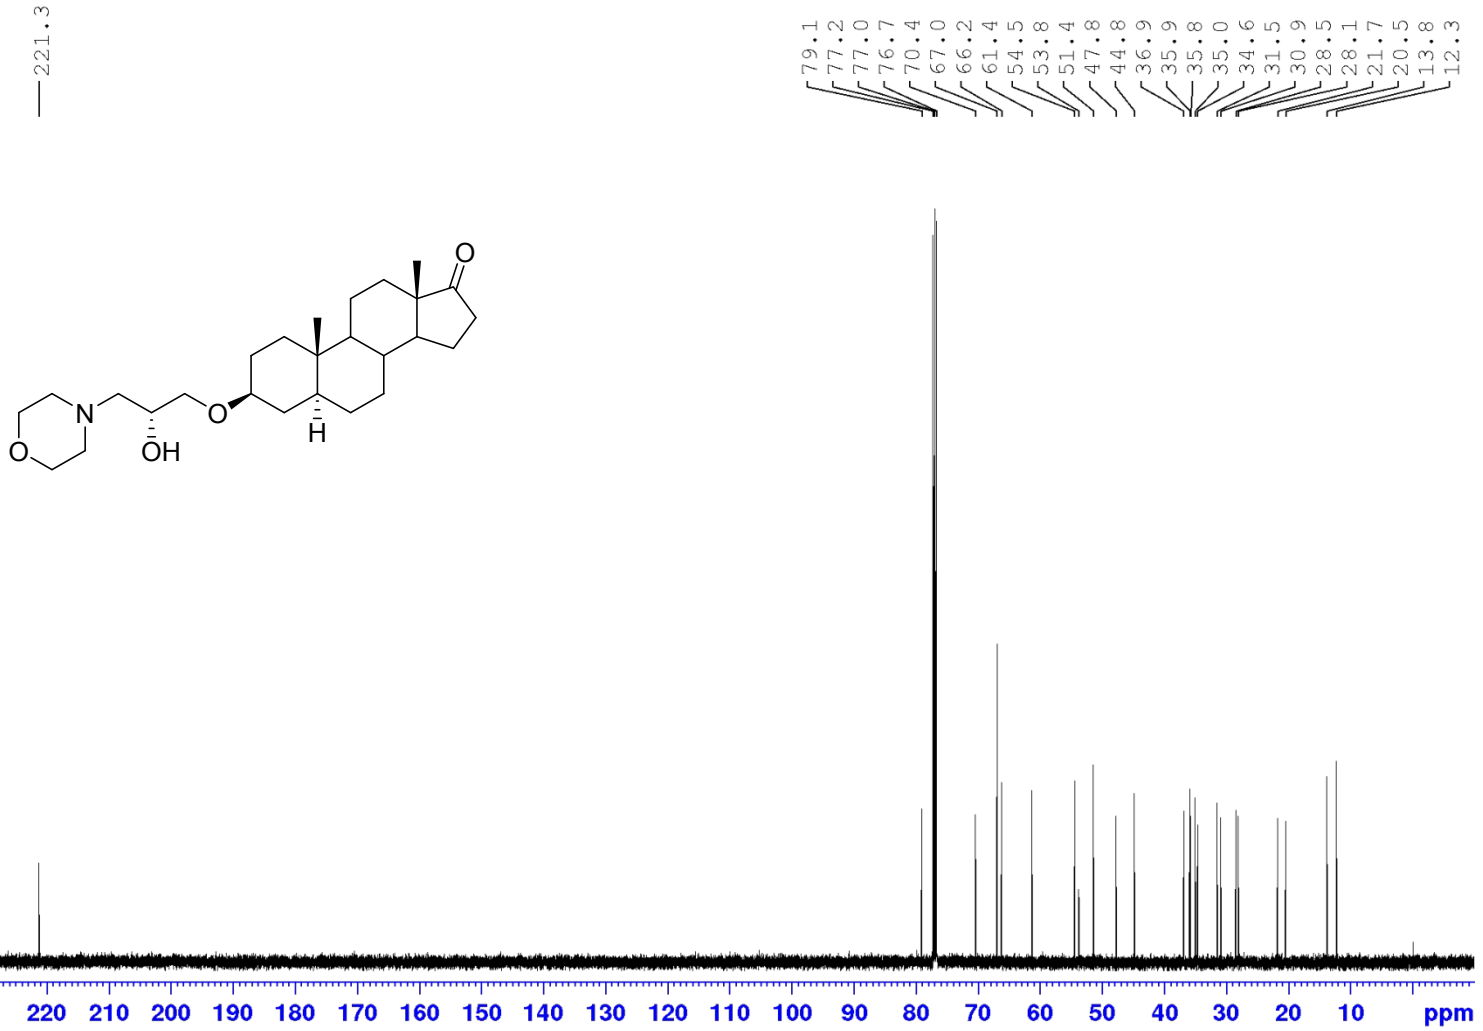

— 221.3

Epiandrosterone (*R*)-2-hydroxy-3-(4-methylpiperazin-1-yl)propyl ether (48) –  $^1\text{H}$  –  $\text{CDCl}_3$  – 500 MHz

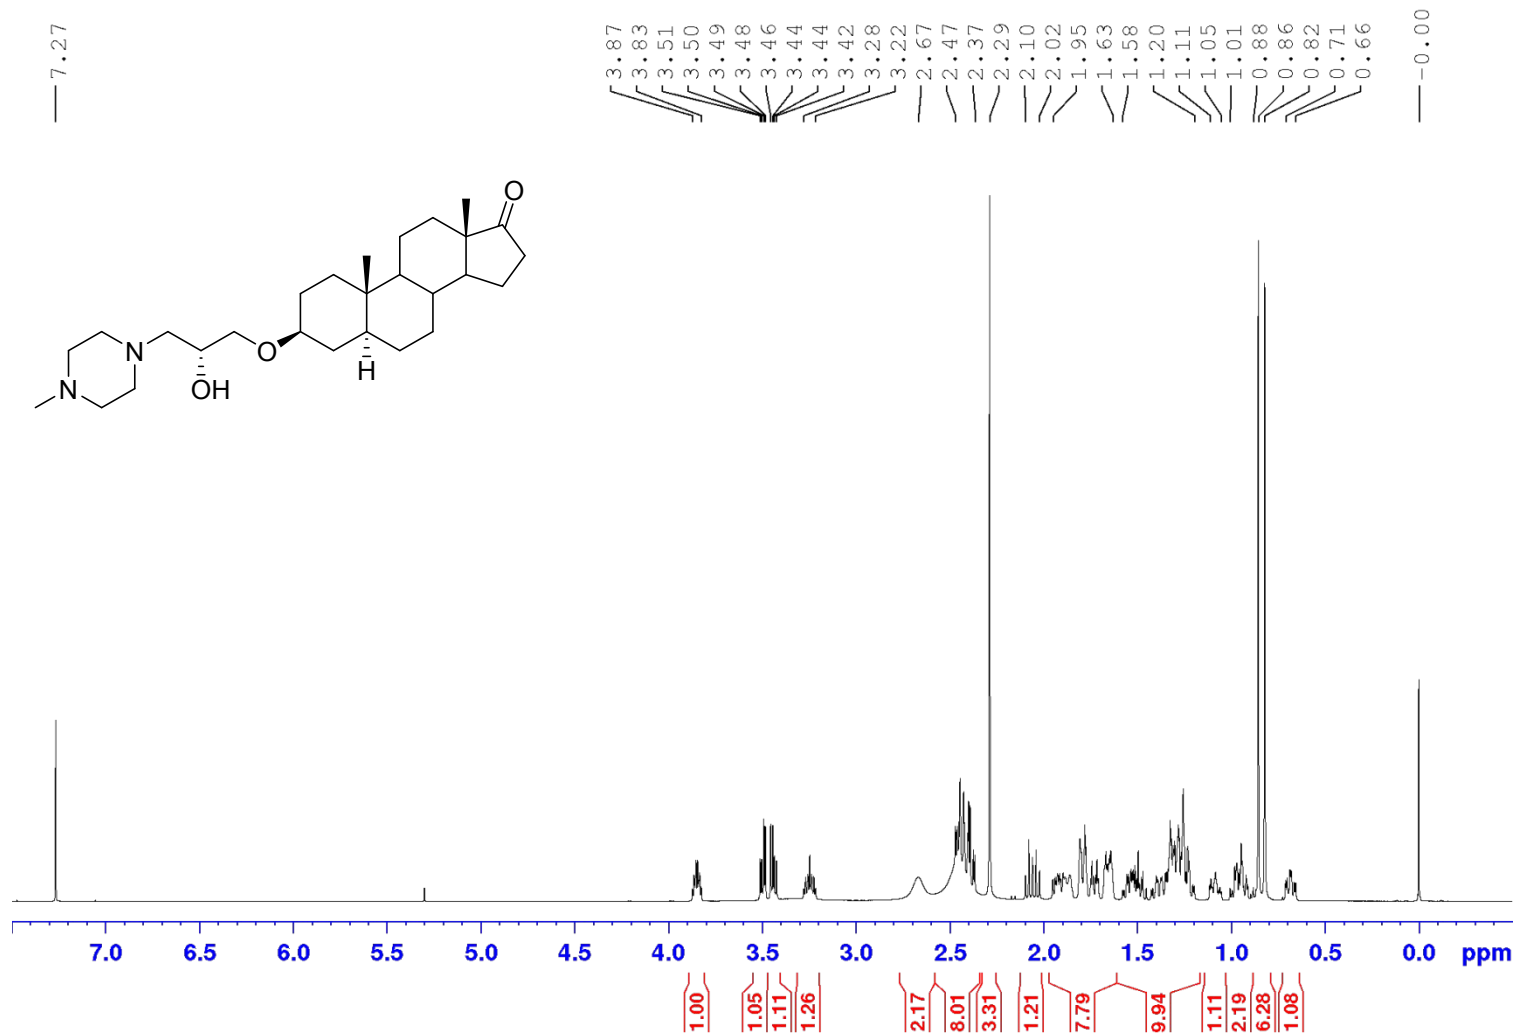

— 221.3

Epiandrosterone (*R*)-2-hydroxy-3-(4-methylpiperazin-1-yl)propyl ether (48) –  $^{13}\text{C}$  –  $\text{CDCl}_3$  – 125 MHz

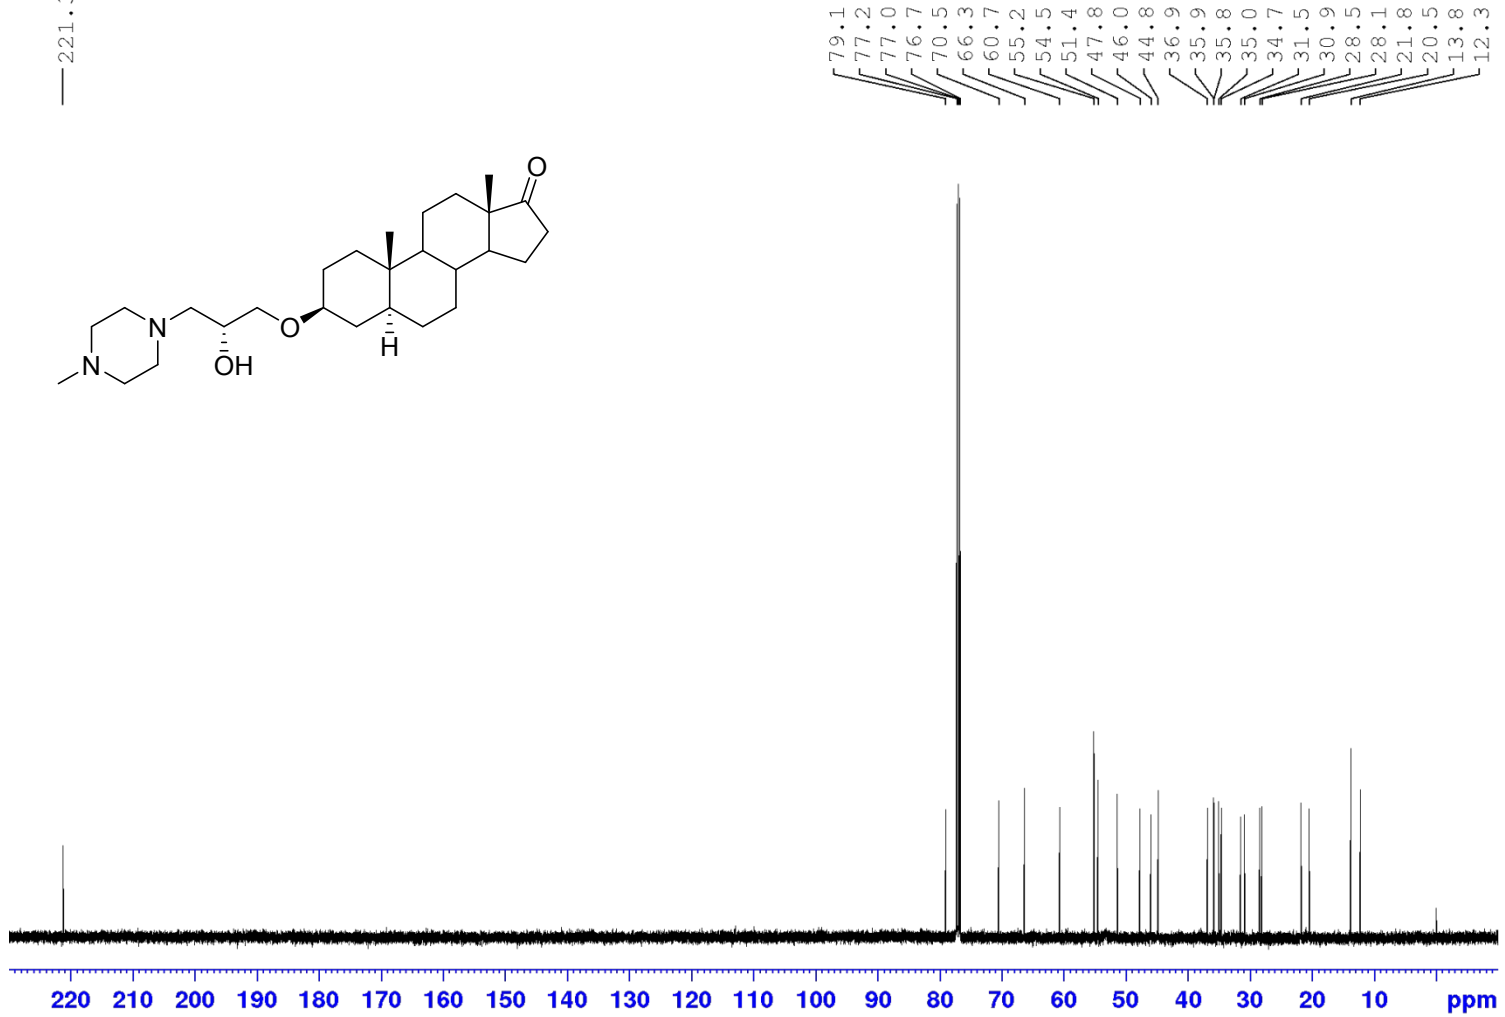

Epiandrosterone (S)-2-hydroxy-3-morpholinopropyl ether (49) – <sup>1</sup>H – CDCl<sub>3</sub> – 500 MHz

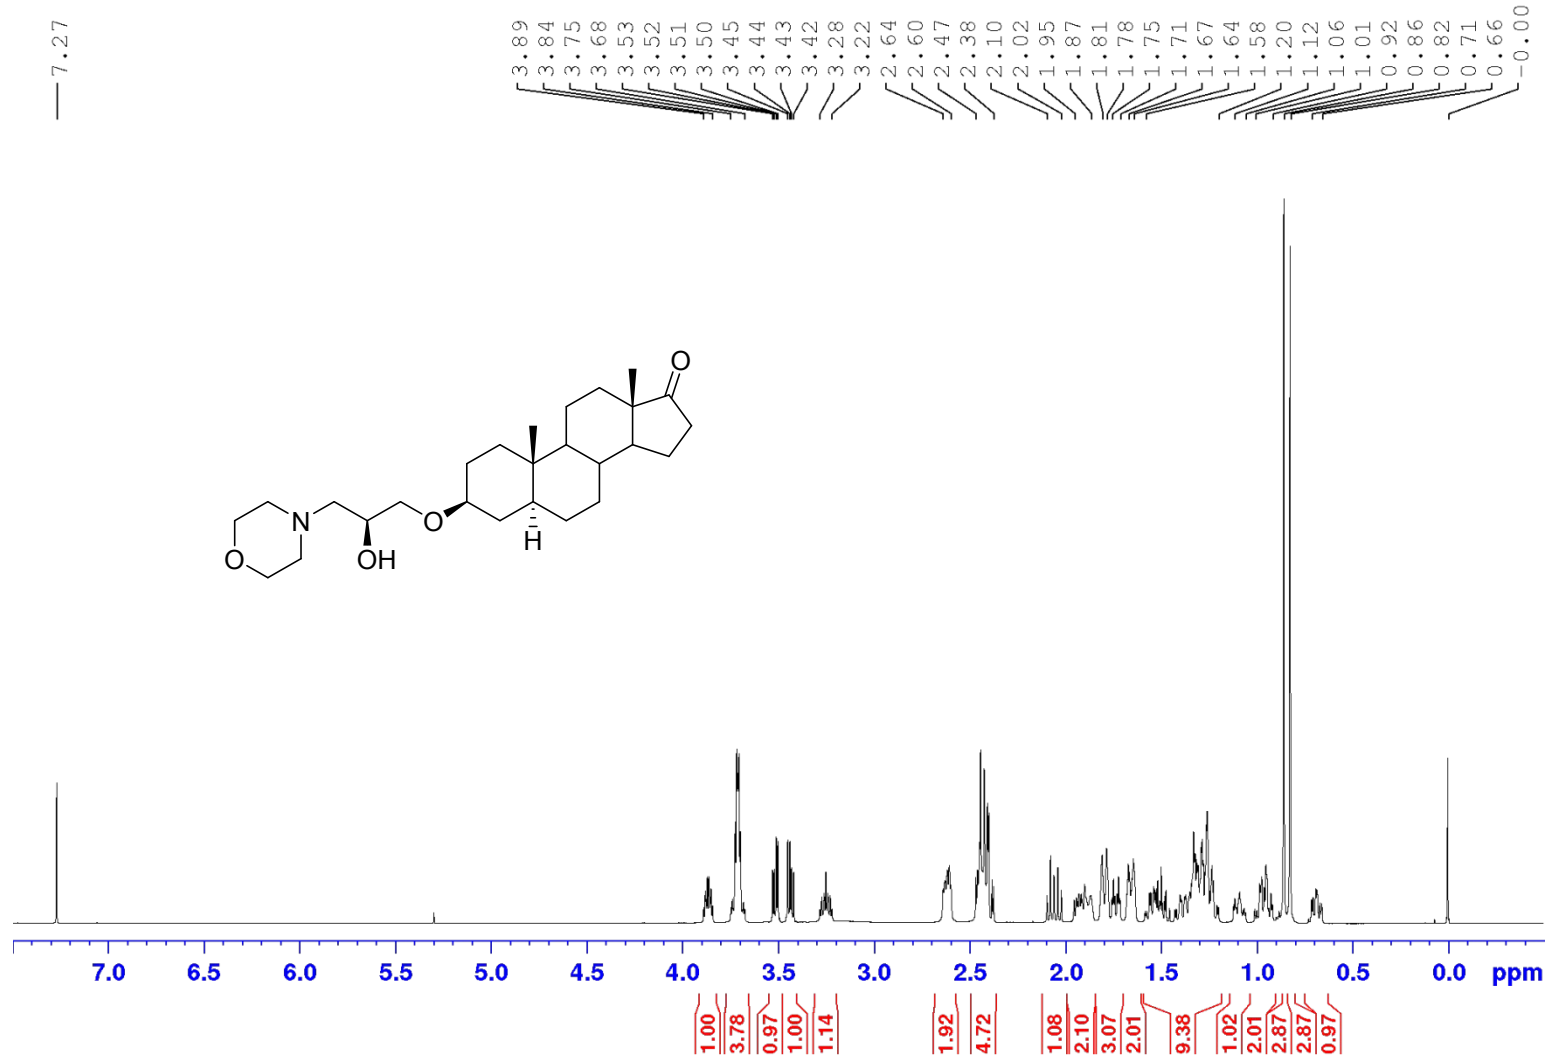

Epiandrosterone (S)-2-hydroxy-3-morpholinopropyl ether (49) –  $^{13}\text{C}$  –  $\text{CDCl}_3$  – 125 MHz

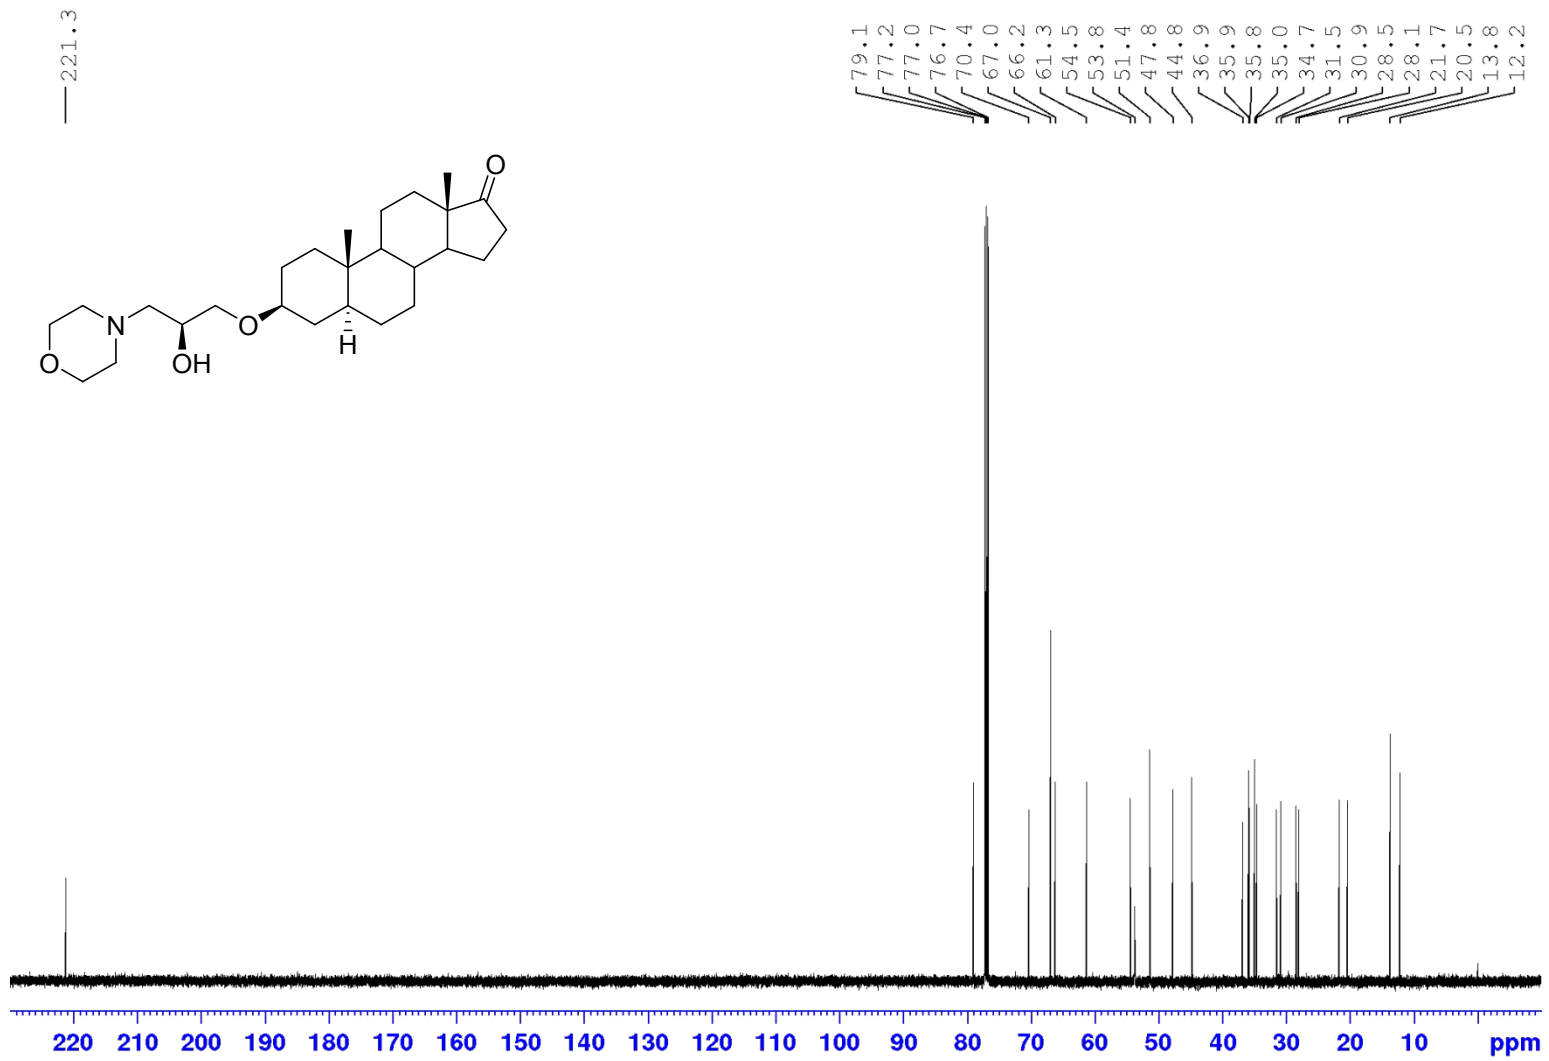

Epiandrosterone (S)-2-hydroxy-3-(4-methylpiperazin-1-yl)propyl ether (50) –  $^1\text{H}$  –  $\text{CDCl}_3$  – 500 MHz

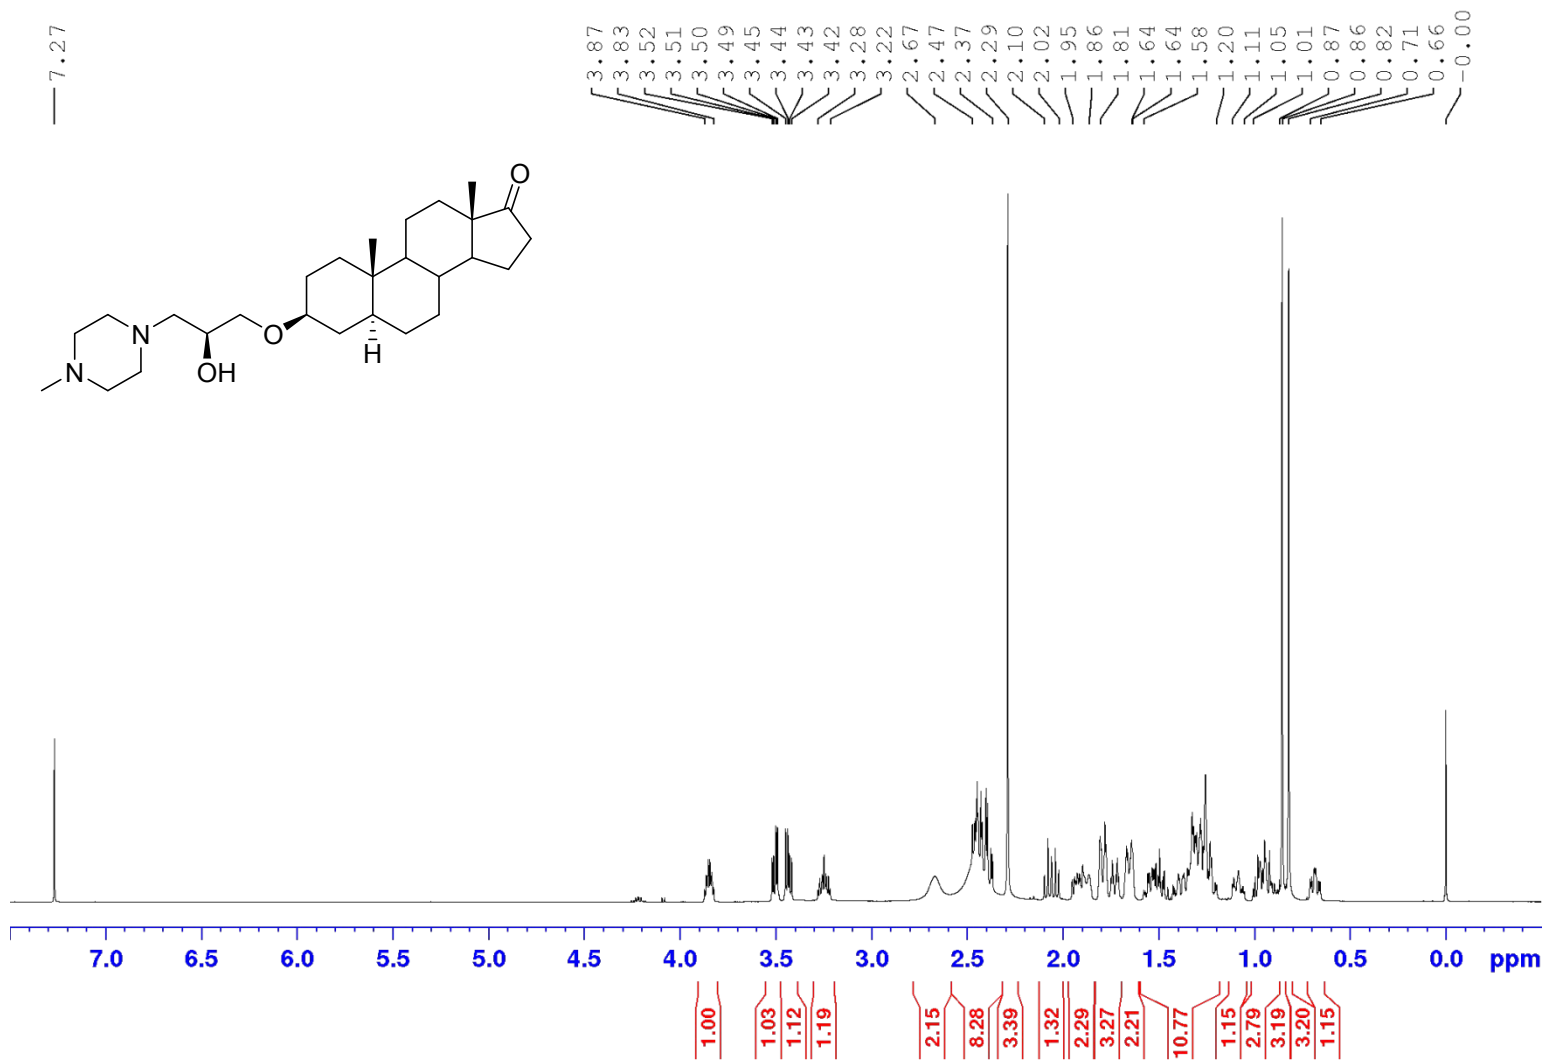

— 221.3

Epiandrosterone (S)-2-hydroxy-3-(4-methylpiperazin-1-yl)propyl ether (50) –  $^{13}\text{C}$  –  $\text{CDCl}_3$  – 125 MHz

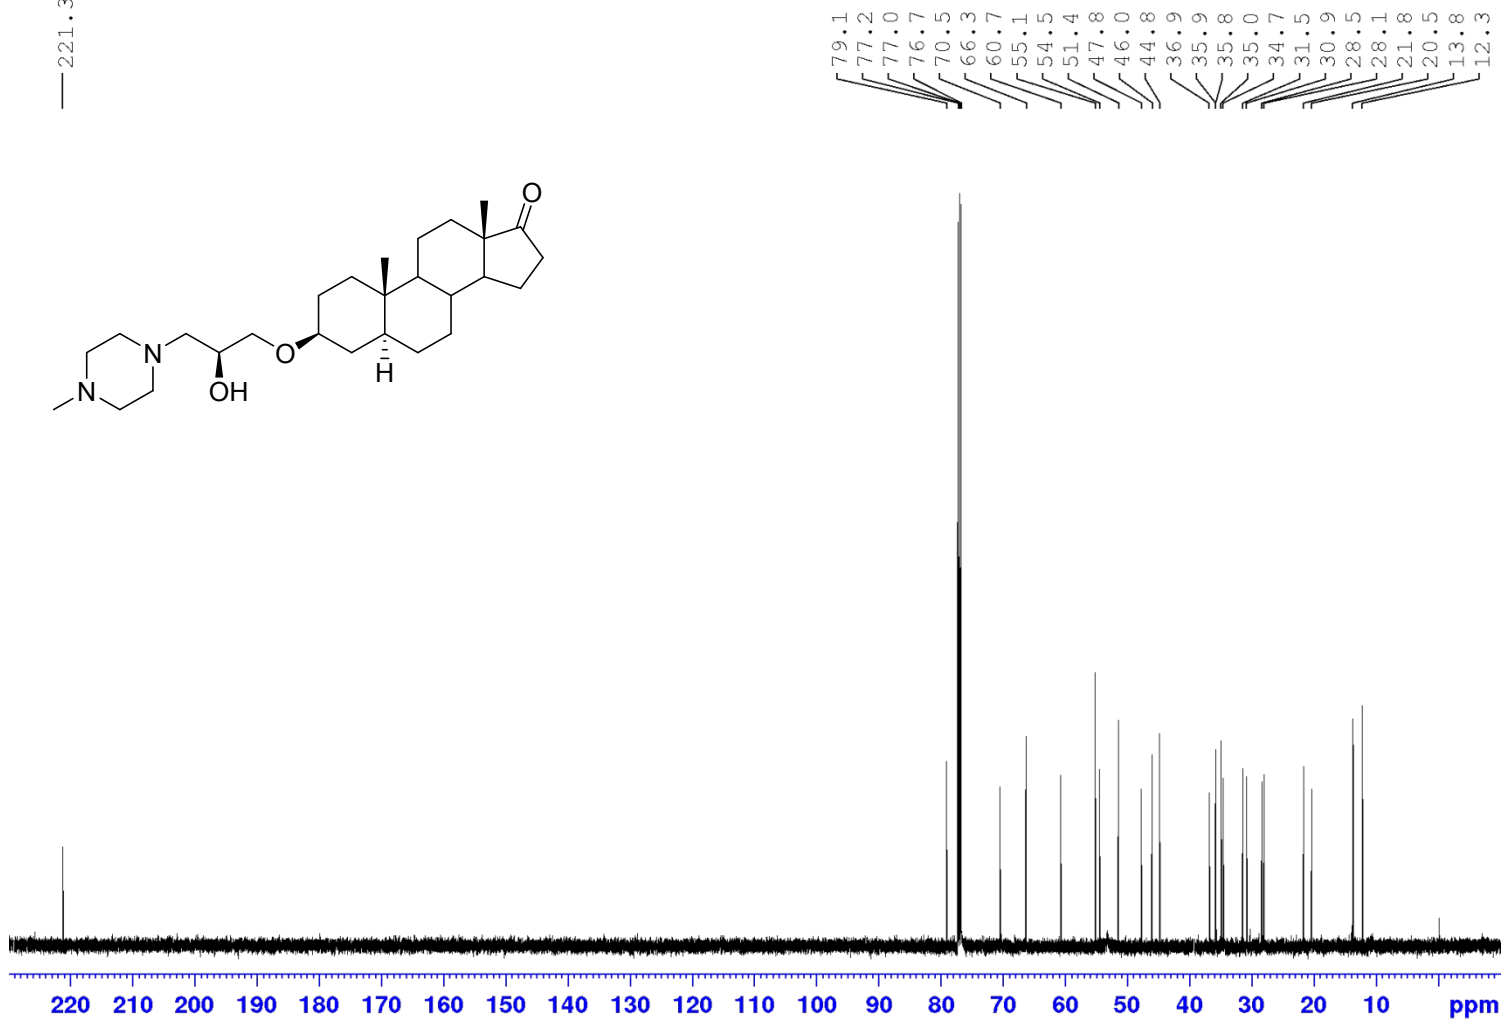

Supplement: ml0c00106_si_002.pdf [file ml0c00106_si_002.pdf]
